# Supplementary material for: A change in metal cation switches selectivity of a phospholipid sensor from phosphatidic acid to phosphatidylserine
Source: Royal Society of Chemistry journal article supplement (doi:10.1039/d4ob00418c), 2024-01-01
Supplement: d4ob00418c1.pdf [file d4ob00418c1.pdf]

# A change in metal cation switches selectivity of a phospholipid sensor from phosphatidic acid to phosphatidylserine

## Supplementary Information

Stephen M. Butler,<sup>a,b,‡</sup> Bilge Ercan,<sup>a,b,‡</sup> Jingyao You,<sup>a,b</sup> Luke P. Schulz,<sup>a</sup> and Katrina A. Jolliffe<sup>a,b,c,\*</sup>

---

<sup>a</sup> School of Chemistry, The University of Sydney, NSW, 2006, Australia

<sup>b</sup> Australian Research Council Centre of Excellence for Innovations in Peptide and Protein Science, The University of Sydney, NSW, 2006, Australia

<sup>c</sup> The University of Sydney Nano Institute (Sydney Nano), The University of Sydney, NSW, 2006, Australia

<sup>‡</sup> These authors contributed equally

### Table of Contents

|                                                     |    |
|-----------------------------------------------------|----|
| Supplementary Figures.....                          | 2  |
| Materials and Methods .....                         | 8  |
| Synthesis.....                                      | 9  |
| <sup>1</sup> H and <sup>13</sup> C NMR spectra..... | 19 |
| Mass Spectra .....                                  | 33 |
| Excitation-Emission Spectra.....                    | 47 |

# Supplementary Figures

## Figure S1

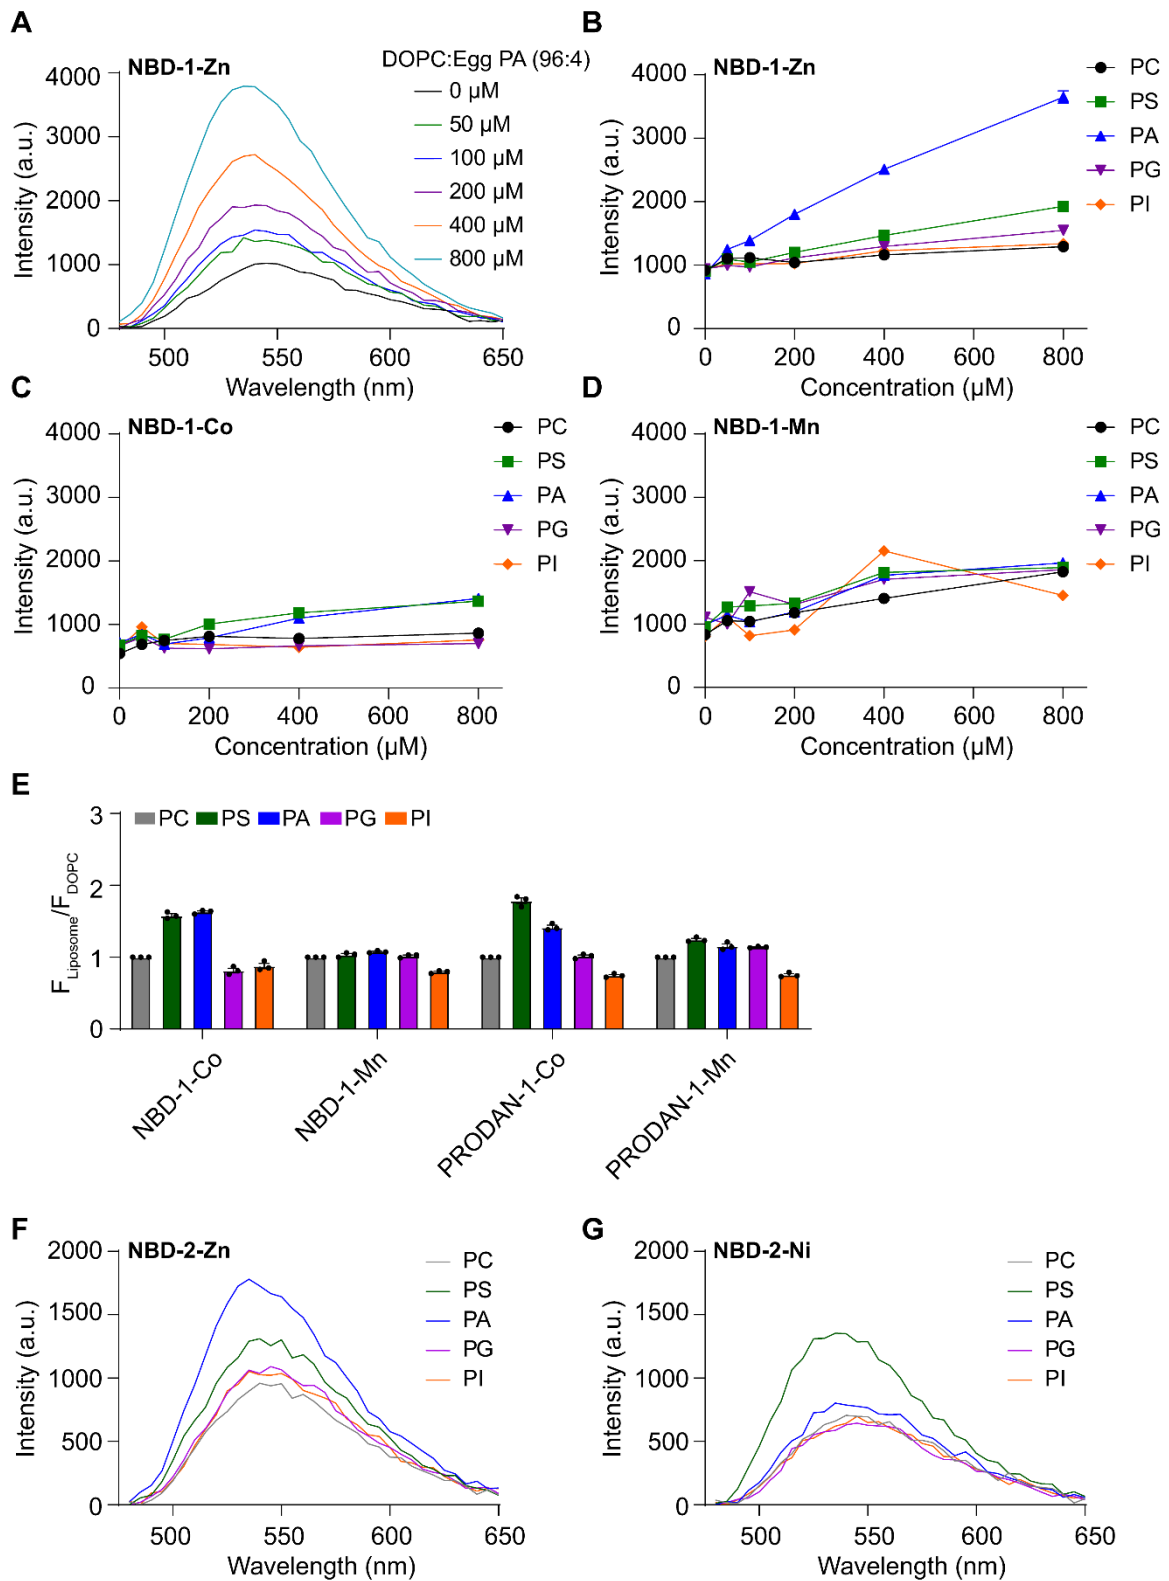

**Figure S1—(A)** Representative emission spectra of **NBD-1-Zn** (8  $\mu$ M) in the presence of liposomes containing 96% PC and 4% PA with increasing liposome concentrations (0  $\mu$ M, 50  $\mu$ M, 100  $\mu$ M, 200  $\mu$ M, 400  $\mu$ M, and 800  $\mu$ M), 50 mM HEPES, 120 mM KOAc, pH 7.5,  $\lambda_{\text{ex}}$ = 460 nm; NBD fluorescence intensity measured at 530 nm for different membrane compositions (100% PC vs. 96% PC and 4% indicated phospholipids) as a function of total lipid concentration for: **(B) NBD-1-Zn**; **(C) NBD-1-Co**; **(D) NBD-1-Mn** [mean  $\pm$  SEM, n=3 independent experiments for each condition]. Fluorescence intensity measured at 530 nm; **(E)** Comparison of fluorescence responses of metal complexes (Co(II) and Mn(II)) of sensors **NBD-1** and **PRODAN-1** to 800  $\mu$ M of liposomes containing 4% of indicated phospholipids and 96% PC. Fluorescence intensity measured at 530 nm for NBD compounds and at 500 nm for PRODAN compounds. Data were normalised to the response obtained from 100% PC liposomes [mean  $\pm$  SEM, n=3 independent experiments for each condition]; Representative emission spectra of: **(F) NBD-2-Zn** (8  $\mu$ M) and **(G) NBD-2-Ni** (8  $\mu$ M) in the presence of liposomes (800  $\mu$ M) containing 100% PC or 96% PC and 4% of the indicated phospholipids (50 mM HEPES, 120 mM KOAc, pH 7.5).

Figure S2

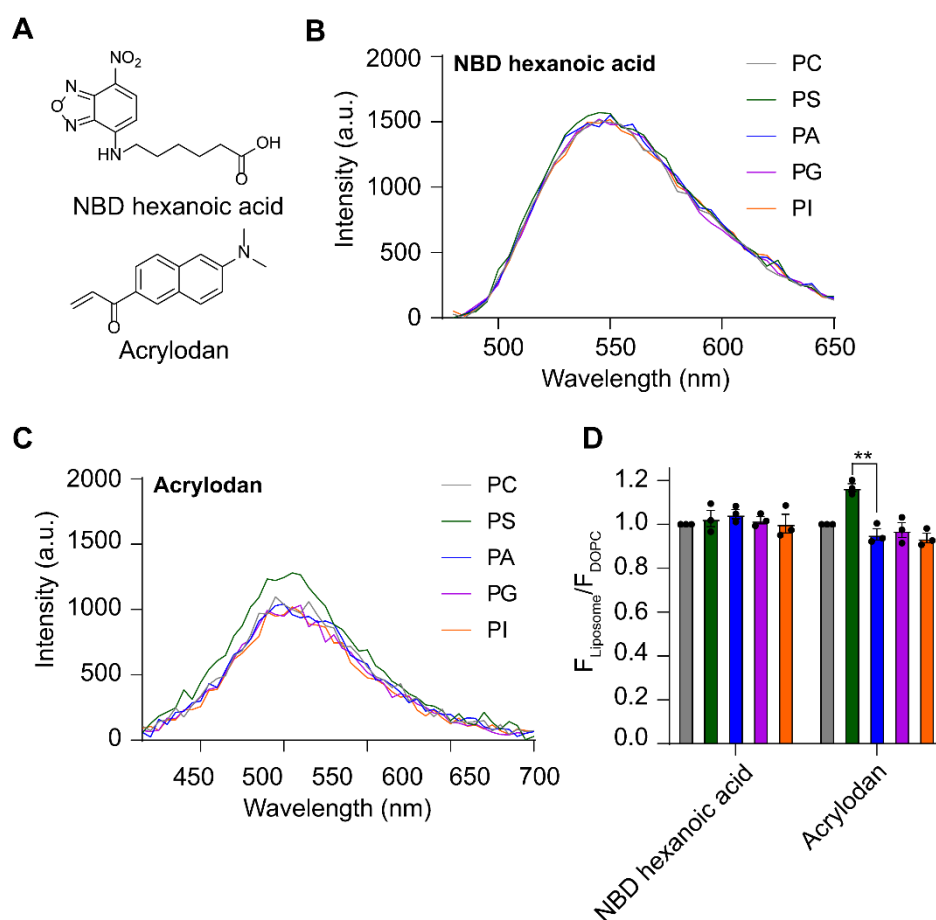

**Figure S2—(A)** Structures of NBD hexanoic acid and acrylodan. Representative emission spectra of: **(B)** NBD hexanoic acid (8  $\mu$ M,  $\lambda_{\text{ex}} = 460$  nm); and **(C)** acrylodan (8  $\mu$ M,  $\lambda_{\text{ex}} = 392$  nm) in the presence of liposomes (800  $\mu$ M) containing 100% PC, or 96% PC and 4% indicated phospholipids (50 mM HEPES, 120 mM KOAc, pH 7.5); **(D)** Comparison of fluorescence responses of fluorophores to 800  $\mu$ M of liposomes containing 4% of indicated phospholipids and 96% PC. Fluorescence intensity measured at 530 nm for NBD hexanoic acid and at 500 nm for acrylodan. Data were normalised to the response obtained from 100% PC liposomes [mean  $\pm$  SEM,  $n=3$  independent experiments for each condition; two-tailed unpaired Student's  $t$ -test, \*\* $P = 0.0024$ ].

Figure S3

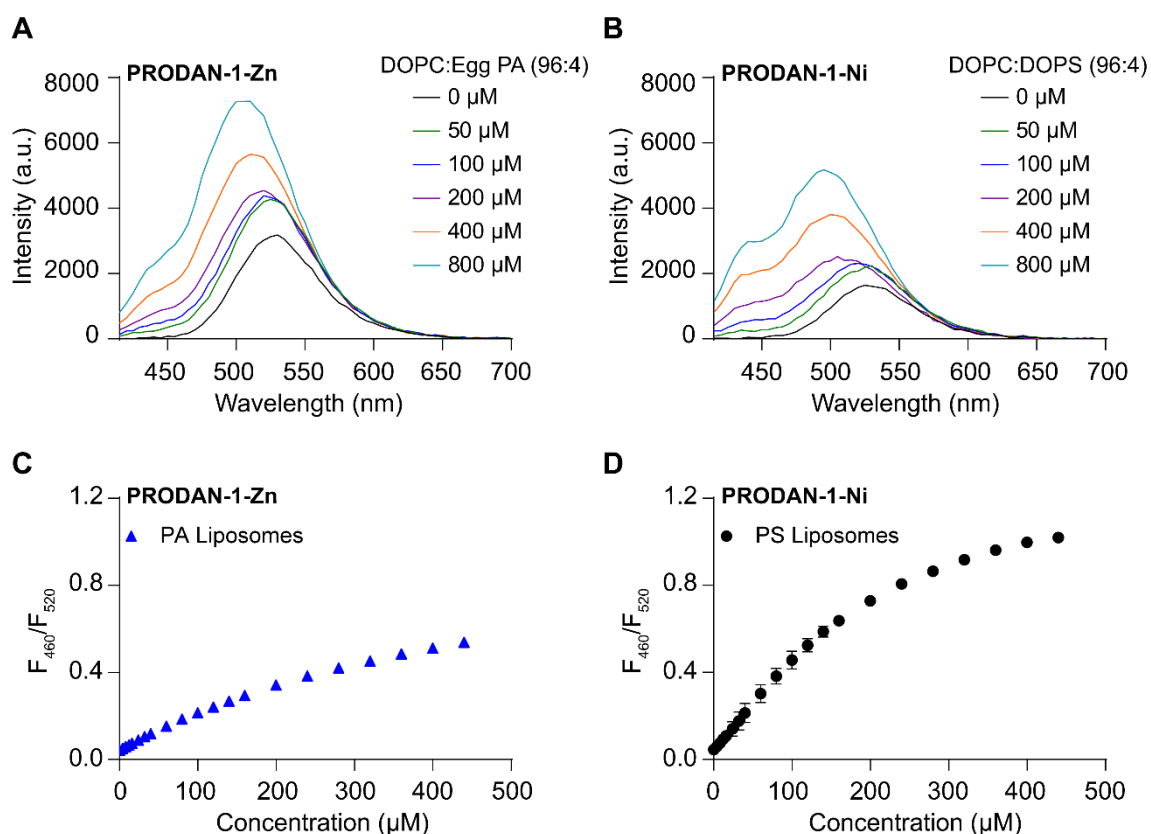

**Figure S3**—Representative emission spectra of: **(A) PRODAN-1-Zn** (8  $\mu\text{M}$ ) and **(B) PRODAN-1-Ni** (8  $\mu\text{M}$ ) in the presence of liposomes containing 96% PC and 4% PA with increasing liposome concentrations (0  $\mu\text{M}$ , 50  $\mu\text{M}$ , 100  $\mu\text{M}$ , 200  $\mu\text{M}$ , 400  $\mu\text{M}$ , and 800  $\mu\text{M}$ ), 50 mM HEPES, 120 mM KOAc, pH 7.5,  $\lambda_{\text{ex}}$ = 392 nm. The plot of the ratio of emission wavelengths at 460 nm and 520 nm ( $F_{460}/F_{520}$ ) versus liposome concentrations for **(C) PRODAN-1-Zn** and **(D) PRODAN-1-Ni** [mean  $\pm$  SD,  $n=2$  independent experiments for each condition].

Figure S4

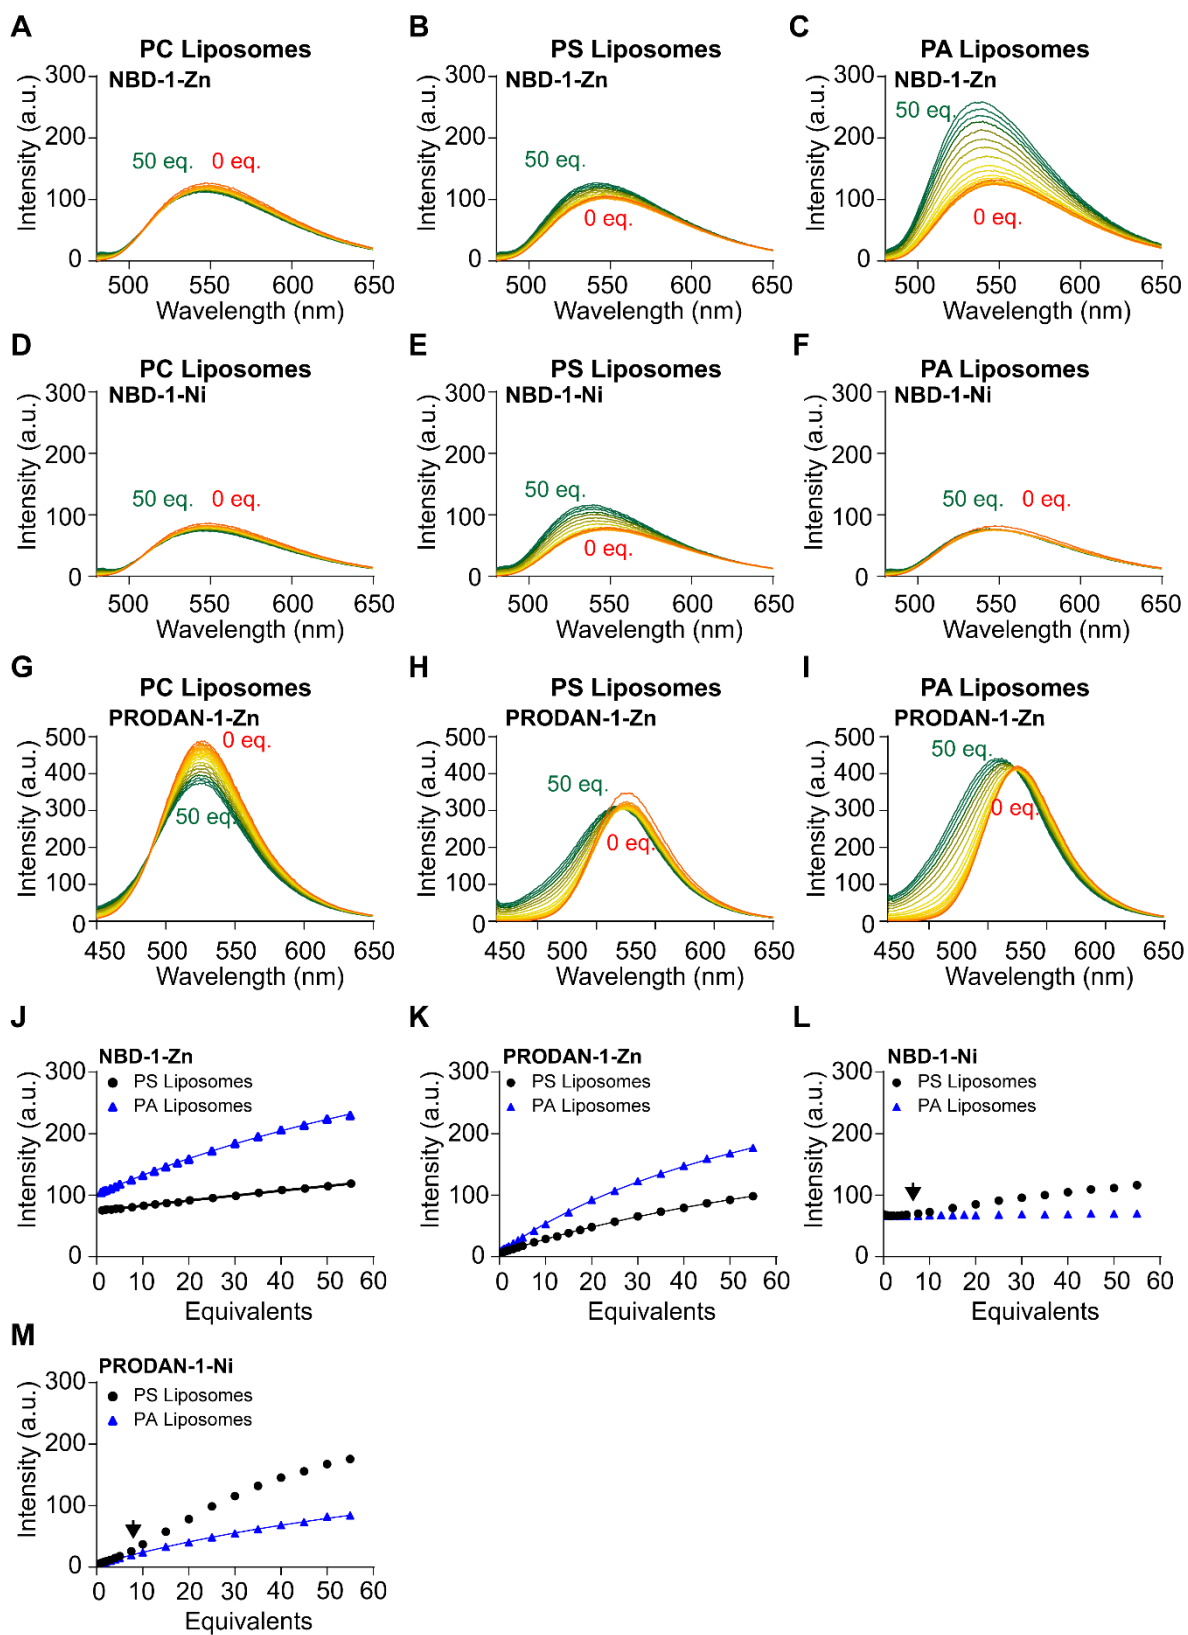

**Figure S4—A-C:** Fluorescence titrations of **NBD-1-Zn** (in 50 mM HEPES, 120 mM KOAc buffer, pH 7.5) with increasing concentrations of liposomes containing: **(A)** (100) DOPC; **(B)** (4:96) DOPS:DOPC; and **(C)** (4:96) Egg PA:DOPC;  $\lambda_{\text{ex}} = 460$  nm; **D-F** Fluorescence titrations of **NBD-1-Ni** (in 50 mM HEPES, 120 mM KOAc buffer, pH 7.5) with increasing concentrations of liposomes containing **(D)** (100) DOPC; **(E)** (4:96) DOPS:DOPC; and **(F)** (4:96) Egg PA:DOPC;  $\lambda_{\text{ex}} = 392$  nm. **G-I:** Fluorescence titrations of **PRODAN-1-Zn** (in 50 mM HEPES, 120 mM KOAc buffer, pH 7.5) with increasing concentrations of liposomes containing **(G)** (100) DOPC; **(H)** (4:96) DOPS:DOPC; and **(I)** (4:96) Egg PA:DOPC;  $\lambda_{\text{ex}} = 392$  nm. **J-M:** Representative binding isotherms indicating change in fluorescence intensity of: **(J)** **NBD-1-Zn**; **(K)** **PRODAN-1-Zn**; **(L)** **NBD-1-Ni**; **(M)** **PRODAN-1-Ni** in response to increasing concentrations of PA- and PS-containing liposomes. Experimental data points are indicated by symbols, and the calculated binding model by lines (Bindfit). Arrows show points of inflection in data. NBD compounds were analysed at 530 nm, and PRODAN compounds at 450 nm.

## Materials and Methods

### *Lipids*

DOPC (850375), DOPS (840035), Egg PA (840101), Egg PG (841138), Soy PI (840044) were purchased from Avanti Polar Lipids.

### *Liposome preparation*

Liposomes were prepared as previously described with slight modifications.<sup>1</sup> Briefly, lipids in chloroform were dried under a stream of N<sub>2</sub> gas, followed by further drying in the vacuum for 2 h. The dried lipid films were hydrated with HK buffer (50 mM HEPES, 120 mM potassium acetate, pH 7.5). Liposomes were then formed by five freeze-thaw cycles (liquid N<sub>2</sub> and 37°C water bath) followed by 11 times extrusion using Avanti Mini-Extruder with a pore size of 100 nm.

### *Liposome binding studies*

The sensors (8 μM) were mixed with indicated liposomes in concentrations 0 μM, 50 μM, 100 μM, 200 μM, 400 μM, and 800 μM followed by NBD and PRODAN excitation at λ<sub>ex</sub> = 460 nm and λ<sub>ex</sub> = 392 nm, respectively. The fluorescent maxima at 530 nm (for NBD) and at 500 nm (for PRODAN) were plotted as a function of liposome concentration in Figure 2B and Figures S1B, S1C, and S1D.

### *Compound characterisation*

Nuclear magnetic resonance (NMR) spectra were recorded at 300 K using either a 600 Bruker Avance (equipped with a high resolution cryogenic triple nucleus probehead), 500 Bruker Avance DPX 400 or a Bruker Avance 300 spectrometer. NMR spectra were calibrated to the residual proton solvent peak in CDCl<sub>3</sub> (δ 7.26 ppm), MeOD-d<sub>4</sub> (δ = 3.31 ppm) or DMSO-d<sub>6</sub> (δ = 2.50 ppm) at 300 K. <sup>1</sup>H NMR and <sup>13</sup>C NMR spectra were recorded at the indicated frequencies. Chemical shifts are expressed as parts per million (ppm) and are referenced to solvent residual signals. The data are reported as chemical shift, multiplicity (s = singlet, d = doublet, t = triplet, m = multiplet), coupling constant *J* in Hz and relative integral. High resolution mass spectra were recorded on a Bruker Apex II Fourier Transform Ion Cyclotron Resonance (FTICR) mass spectrometer with a 7.0 T magnet, fitted with an off-axis Analytic electrospray source with quadrupole mass analyser, and are reported as *m/z* (relative intensity).



## Determination of binding affinities

To a 1 cm quartz glass cuvette was added a solution of the sensor (2.5 mL, 8  $\mu$ M) and the fluorescence spectrum was recorded. Aliquots of a stock solution containing the sensor (8  $\mu$ M) and the indicated liposomes (1840  $\mu$ M lipid concentration) were then added to the cuvette. After each addition, the solution was mixed by stirring before the next fluorescence spectrum was taken. (For NBD,  $\lambda_{ex}$  = 460 nm,  $\lambda_{em}$  = 480–650 nm. For PRODAN,  $\lambda_{ex}$  = 392 nm,  $\lambda_{em}$  = 415–650 nm). Binding affinities were determined through analysis with the Bindfit web app.<sup>2,3</sup> Data were fit by inputting the fluorescence intensities observed across a range of liposome concentrations, in the regions 470 – 500 nm (**PRODAN-1**) and 520 – 580 nm (**NBD-1**). The raw data and results of fitting may be accessed through the URLs in the table below.

| Sensor      | Target phospholipid | Replicate | URL                                                                                                                                                                           |
|-------------|---------------------|-----------|-------------------------------------------------------------------------------------------------------------------------------------------------------------------------------|
| NBD-1-Zn    | PA                  | 1         | <a href="http://app.supramolecular.org/bindfit/view/1d157e89-79a6-426d-9c1c-9deee1c85f3c">http://app.supramolecular.org/bindfit/view/1d157e89-79a6-426d-9c1c-9deee1c85f3c</a> |
| NBD-1-Zn    | PA                  | 2         | <a href="http://app.supramolecular.org/bindfit/view/d8ef163a-f82b-4c18-81e0-2def32d2d862">http://app.supramolecular.org/bindfit/view/d8ef163a-f82b-4c18-81e0-2def32d2d862</a> |
| NBD-1-Zn    | PA                  | 3         | <a href="http://app.supramolecular.org/bindfit/view/cdce3ce1-dc08-4638-a453-72275d057c48">http://app.supramolecular.org/bindfit/view/cdce3ce1-dc08-4638-a453-72275d057c48</a> |
| NBD-1-Zn    | PS                  | 1         | <a href="http://app.supramolecular.org/bindfit/view/64c33a5b-c8f5-4db5-b391-94ff940f3636">http://app.supramolecular.org/bindfit/view/64c33a5b-c8f5-4db5-b391-94ff940f3636</a> |
| NBD-1-Zn    | PS                  | 2         | <a href="http://app.supramolecular.org/bindfit/view/e52667cb-f06f-49ff-bd77-3af35fcd47b7">http://app.supramolecular.org/bindfit/view/e52667cb-f06f-49ff-bd77-3af35fcd47b7</a> |
| NBD-1-Zn    | PS                  | 3         | <a href="http://app.supramolecular.org/bindfit/view/bc03ddfb-3c69-44c2-adea-3040bd235e9e">http://app.supramolecular.org/bindfit/view/bc03ddfb-3c69-44c2-adea-3040bd235e9e</a> |
| NBD-1-Ni    | PA                  | 1         | <a href="http://app.supramolecular.org/bindfit/view/3dcd97c0-70ce-4767-83b0-7777acb5ed2d">http://app.supramolecular.org/bindfit/view/3dcd97c0-70ce-4767-83b0-7777acb5ed2d</a> |
| NBD-1-Ni    | PS                  | 1         | <a href="http://app.supramolecular.org/bindfit/view/cfe51ea-9cea-4b17-9214-74cbaf664f61">http://app.supramolecular.org/bindfit/view/cfe51ea-9cea-4b17-9214-74cbaf664f61</a>   |
| NBD-1-Ni    | PS                  | 2         | <a href="http://app.supramolecular.org/bindfit/view/452217f5-c49b-442d-9f29-28e2a8c5642f">http://app.supramolecular.org/bindfit/view/452217f5-c49b-442d-9f29-28e2a8c5642f</a> |
| NBD-1-Ni    | PS                  | 3         | <a href="http://app.supramolecular.org/bindfit/view/1296d4c0-2fd1-4c14-a0e7-f6fb08b31fe">http://app.supramolecular.org/bindfit/view/1296d4c0-2fd1-4c14-a0e7-f6fb08b31fe</a>   |
| PRODAN-1-Zn | PA                  | 1         | <a href="http://app.supramolecular.org/bindfit/view/42f7b102-fa28-4a0e-affb-6e8f021ad367">http://app.supramolecular.org/bindfit/view/42f7b102-fa28-4a0e-affb-6e8f021ad367</a> |
| PRODAN-1-Zn | PA                  | 2         | <a href="http://app.supramolecular.org/bindfit/view/a3c02d7d-c47e-4350-a0cd-8ed0e8d6ef9c">http://app.supramolecular.org/bindfit/view/a3c02d7d-c47e-4350-a0cd-8ed0e8d6ef9c</a> |
| PRODAN-1-Zn | PA                  | 3         | <a href="http://app.supramolecular.org/bindfit/view/4169f80c-da3d-4c9b-83b6-589e0ca2ae72">http://app.supramolecular.org/bindfit/view/4169f80c-da3d-4c9b-83b6-589e0ca2ae72</a> |
| PRODAN-1-Zn | PS                  | 1         | <a href="http://app.supramolecular.org/bindfit/view/d212daf5-5e19-4548-9385-d6e4eaf0edc9">http://app.supramolecular.org/bindfit/view/d212daf5-5e19-4548-9385-d6e4eaf0edc9</a> |
| PRODAN-1-Zn | PS                  | 2         | <a href="http://app.supramolecular.org/bindfit/view/7048420f-81b3-4a9d-9cf8-77d9641837d5">http://app.supramolecular.org/bindfit/view/7048420f-81b3-4a9d-9cf8-77d9641837d5</a> |

|             |    |   |                                                                                                                                                                               |
|-------------|----|---|-------------------------------------------------------------------------------------------------------------------------------------------------------------------------------|
| PRODAN-1-Zn | PS | 3 | <a href="http://app.supramolecular.org/bindfit/view/fe1b5387-3275-4e09-889e-0356e7ded4b2">http://app.supramolecular.org/bindfit/view/fe1b5387-3275-4e09-889e-0356e7ded4b2</a> |
| PRODAN-1-Ni | PA | 1 | <a href="http://app.supramolecular.org/bindfit/view/7341390d-691e-40db-a9f4-ddb69888132c">http://app.supramolecular.org/bindfit/view/7341390d-691e-40db-a9f4-ddb69888132c</a> |
| PRODAN-1-Ni | PA | 2 | <a href="http://app.supramolecular.org/bindfit/view/98343455-836c-4136-8b8f-930988c2b602">http://app.supramolecular.org/bindfit/view/98343455-836c-4136-8b8f-930988c2b602</a> |
| PRODAN-1-Ni | PA | 3 | <a href="http://app.supramolecular.org/bindfit/view/749eaa96-bd36-49cf-9ba3-5c4b223906db">http://app.supramolecular.org/bindfit/view/749eaa96-bd36-49cf-9ba3-5c4b223906db</a> |
| PRODAN-1-Ni | PS | 1 | <a href="http://app.supramolecular.org/bindfit/view/80cf5bbe-790b-46a7-b2ce-633be567f854">http://app.supramolecular.org/bindfit/view/80cf5bbe-790b-46a7-b2ce-633be567f854</a> |
| PRODAN-1-Ni | PS | 2 | <a href="http://app.supramolecular.org/bindfit/view/bedba209-7668-4688-9bc5-28df3fed6d6c">http://app.supramolecular.org/bindfit/view/bedba209-7668-4688-9bc5-28df3fed6d6c</a> |
| PRODAN-1-Ni | PS | 3 | <a href="http://app.supramolecular.org/bindfit/view/0be8ba63-ca74-4897-b499-1e21d78b9323">http://app.supramolecular.org/bindfit/view/0be8ba63-ca74-4897-b499-1e21d78b9323</a> |

## Synthesis

All chemicals and solvents were of reagent grade (>95%) and used as received unless otherwise noted. NBD hexanoic acid was prepared as previously described.<sup>4</sup> Sensor **NBD-1** was synthesised by solid phase peptide synthesis (SPPS) from commercially available Fmoc-protected amino acids and NBD hexanoic acid on Rink amide resin. The DPA group was introduced on-resin by reductive amination with pyridine-2-carboxaldehyde onto the free amine of a Dab side chain, following deprotection of an allyloxycarbamate protecting group. The peptide backbone of sensor **NBD-2** was synthesised on Rink amide resin by SPPS, with on-resin introduction of the DPA group, and solution phase attachment of the NBD fluorophore with NBD-Cl. Sensor **PRODAN-1** was similarly synthesised on Rink amide resin by SPPS, with on-resin introduction of the DPA group, and solution-phase conjugation of the PRODAN fluorophore using acrylodan. The completed peptides were complexed with each divalent metal utilizing exactly one equivalent of metal salt. Complexation was confirmed by HRMS and by <sup>1</sup>H/<sup>13</sup>C NMR (Zn only).

### Loading of Rink amide resin

Rink amide resin (loading 0.463 mmol/g) in a fritted syringe was swollen in DMF for 15 minutes, then washed with DMF (x3), CH<sub>2</sub>Cl<sub>2</sub> (x3), and DMF (x3). The resin was treated with 20% piperidine (v/v) in DMF (2x 5 mins) to remove the Fmoc protecting group, and the resin subsequently washed with DMF (x3), CH<sub>2</sub>Cl<sub>2</sub> (x3), and DMF (x1). A solution of Fmoc-protected amino acid, preactivated for 5 mins with PyBOP (2.5 eq) and DIPEA (8 eq.) in DMF (0.05 M) was drawn into the syringe, and the resulting suspension agitated at r.t. for 1 h. The solution was ousted, and the resin washed with DMF (x3), CH<sub>2</sub>Cl<sub>2</sub> (x3), and DMF (x3).

### N-terminal Fmoc deprotection

The resin was treated with 20% piperidine (v/v) in DMF (2x 5 mins) to remove the Fmoc protecting group, and the resin subsequently washed with DMF (x3), CH<sub>2</sub>Cl<sub>2</sub> (x3), and DMF (x1). The free amine was immediately coupled with the next amino acid.

### Estimation of resin loading

The ousted Fmoc deprotection solution was diluted with fresh 20% piperidine (v/v) in DMF, to produce two solutions of differing concentration, such that the concentration of the fulvene-piperidine adduct for each was in the range of 25 – 75 μM. A sample of each of these solutions was transferred to a clean 1 cm quartz glass cuvette, and the absorbance measured at 301 nm, using fresh 20% piperidine (v/v) in DMF solution as a reference. The concentration of fulvene adduct in each dilution was calculated using  $\epsilon = 7800 \text{ M}^{-1} \text{ cm}^{-1}$ , and the final resin loading calculated from the average calculated values of the original deprotection solution.

### Amino acid coupling

A solution of Fmoc-protected amino acid, preactivated for 5 mins with PyBOP (2.5 eq) and DIPEA (8 eq.) in DMF (0.05 M) was drawn into the syringe, and the resulting suspension agitated at r.t. for 1 h. The solution was ousted, and the resin washed with DMF (x3), CH<sub>2</sub>Cl<sub>2</sub> (x3), and DMF (x3).

### **Alloc deprotection**

The resin was swollen in CH<sub>2</sub>Cl<sub>2</sub> for 15 mins, then agitated with a solution of Pd(PPh<sub>3</sub>)<sub>4</sub> (0.8 eq) and phenylsilane (25 eq) in CH<sub>2</sub>Cl<sub>2</sub> (0.05 M) for 1 h at r.t.. The syringe was vented several times to avoid excess pressure build up. The resin was washed with CH<sub>2</sub>Cl<sub>2</sub> (x3) and agitated with Pd(PPh<sub>3</sub>)<sub>4</sub>/phenylsilane solution for a further 1 h. The resin was washed with CH<sub>2</sub>Cl<sub>2</sub> (x3), sodium diethyldithiocarbamate (20 mg/mL) with 1% NEt<sub>3</sub> (v/v) in DMF (x10), 1% NEt<sub>3</sub> (v/v) in DMF (x10), DMF (x3) and CH<sub>2</sub>Cl<sub>2</sub> (x3).

### **Reductive amination**

A suspension of Na(OAc)<sub>3</sub>BH (25 eq) and 2-pyridinecarboxaldehyde (20 eq) in 1% AcOH (v/v) in DMF (0.05 M) or in 1% AcOH (v/v) in 1:1 CH<sub>2</sub>Cl<sub>2</sub>:DMF was added to the resin *via* the back of the syringe, and the resulting suspension agitated overnight at r.t.. The resin was washed with methanol (x10), DMF (x3), and CH<sub>2</sub>Cl<sub>2</sub> (x3).

### **Cleavage of peptides from resin**

The resin was treated with a solution of trifluoroacetic acid/H<sub>2</sub>O/triisopropylsilane (95:2.5:2.5 v/v/v) (0.05 M) for 1 h at r.t.. The solution was ousted into a weighed centrifuge tube. The resin was treated with the same solution twice more (15 mins, 5 mins) and the solution collected again. Chilled diethyl ether was added to the combined ousted deprotection solutions, and the resulting suspension centrifuged (4000 rpm, 5 mins). The supernatant solution was decanted off, and pellet dried under vacuum to afford the crude peptide as the trifluoroacetate salt.

### **Purification**

Peptides were purified by flash column chromatography on C8 silica, eluting with gradients of H<sub>2</sub>O/MeCN (0.1% v/v of a 25% NH<sub>4</sub>OH solution in H<sub>2</sub>O was used as an additive). Fractions containing product were lyophilised, to afford the pure peptides as fluffy solids.

### **Complexation**

An aqueous solution of Zn(NO<sub>3</sub>)<sub>2</sub>.4H<sub>2</sub>O, NiCl<sub>2</sub>.6H<sub>2</sub>O, MnCl<sub>2</sub>.2H<sub>2</sub>O, or CoCl<sub>2</sub>.6H<sub>2</sub>O (1 eq) was added to a solution of peptide in MeOH/H<sub>2</sub>O (ratios and quantities were varied as necessary to dissolve the peptide). The solution was thoroughly mixed, and allowed to stand for 2 h at r.t.. The MeOH was removed under a flow of nitrogen, and the resulting residue dissolved in MeCN/H<sub>2</sub>O, then lyophilised to afford the metal complex.

## NBD-1-M Synthesis

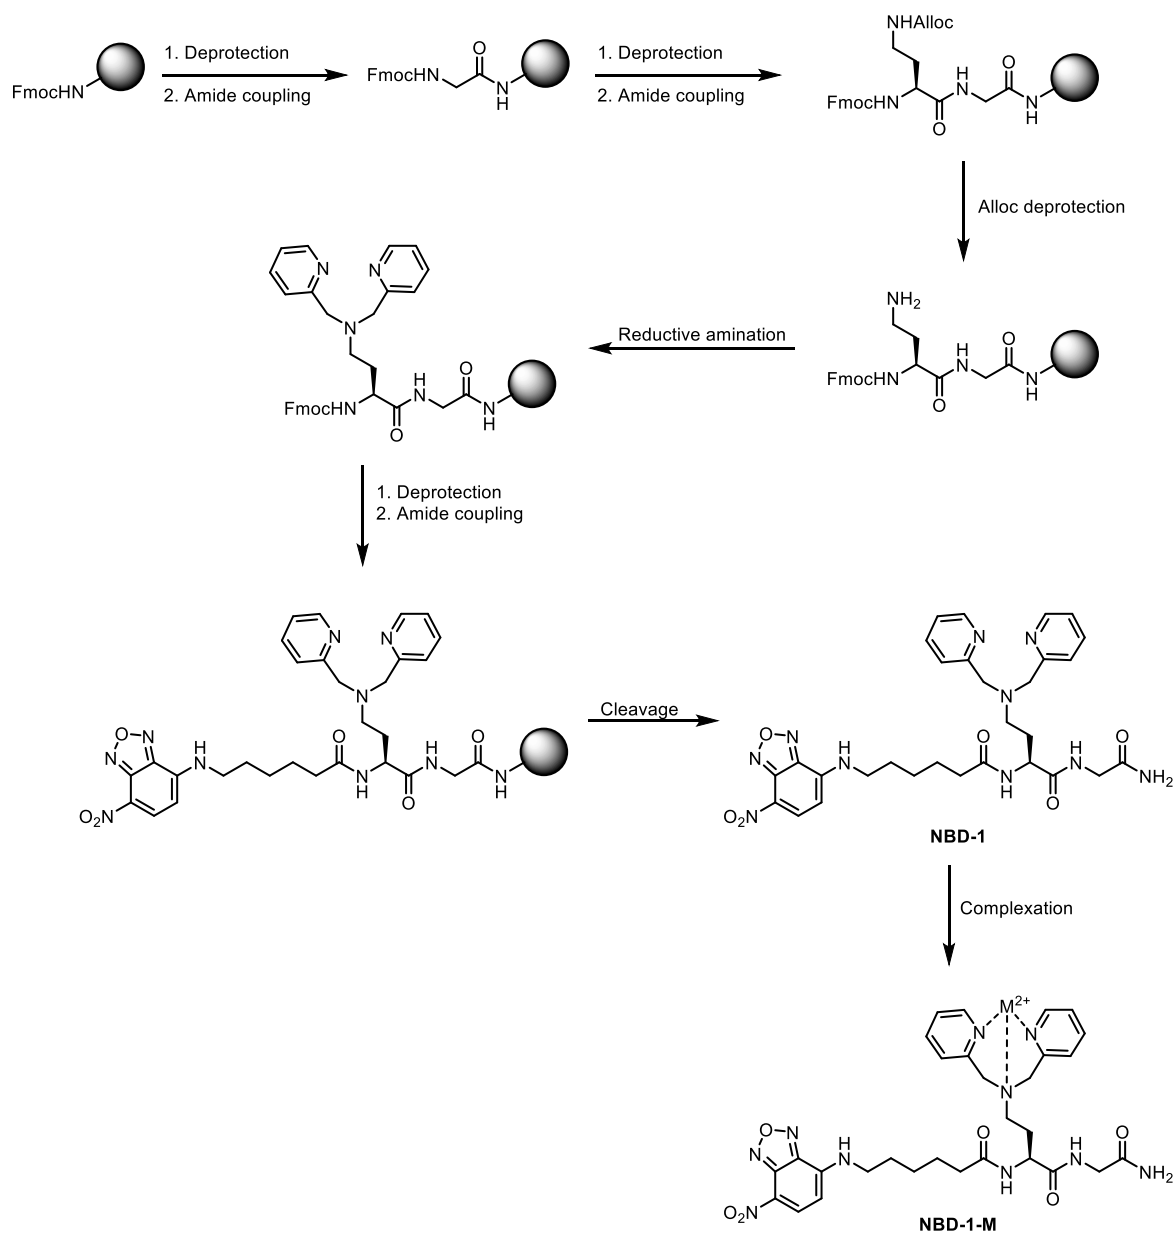

## NBD-2-M Synthesis

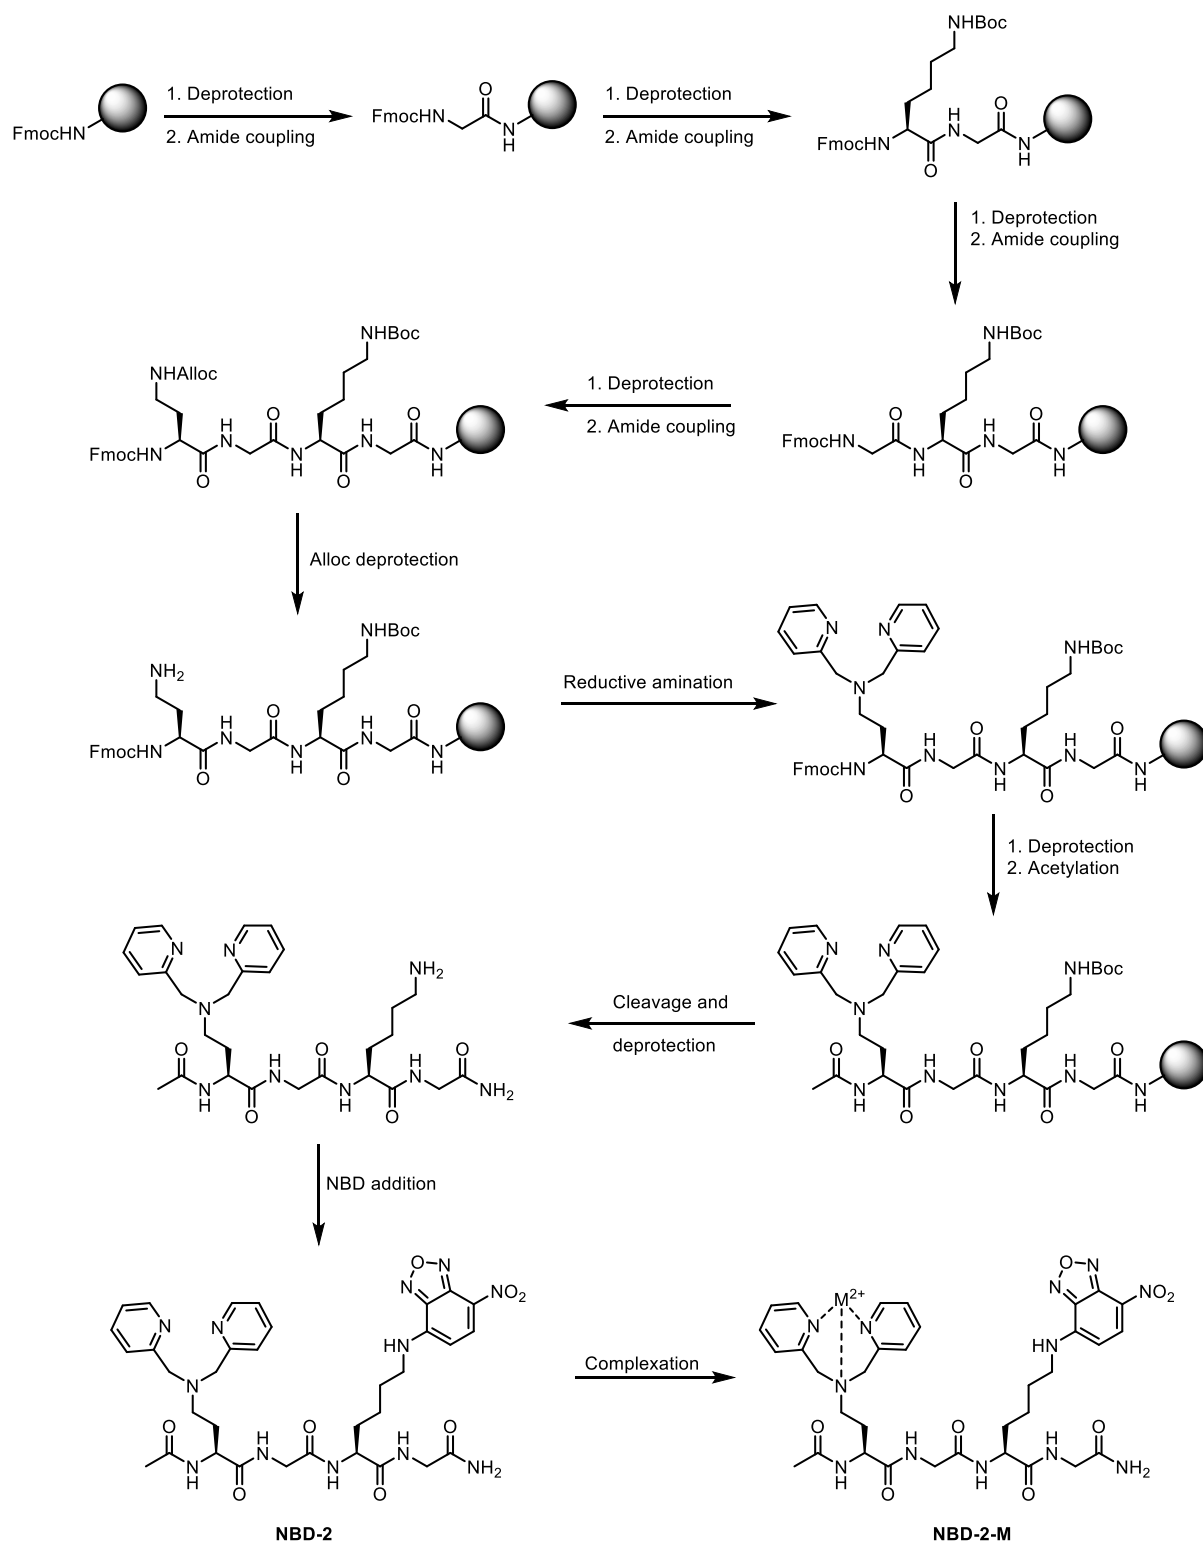

## PRODAN-1-M Synthesis

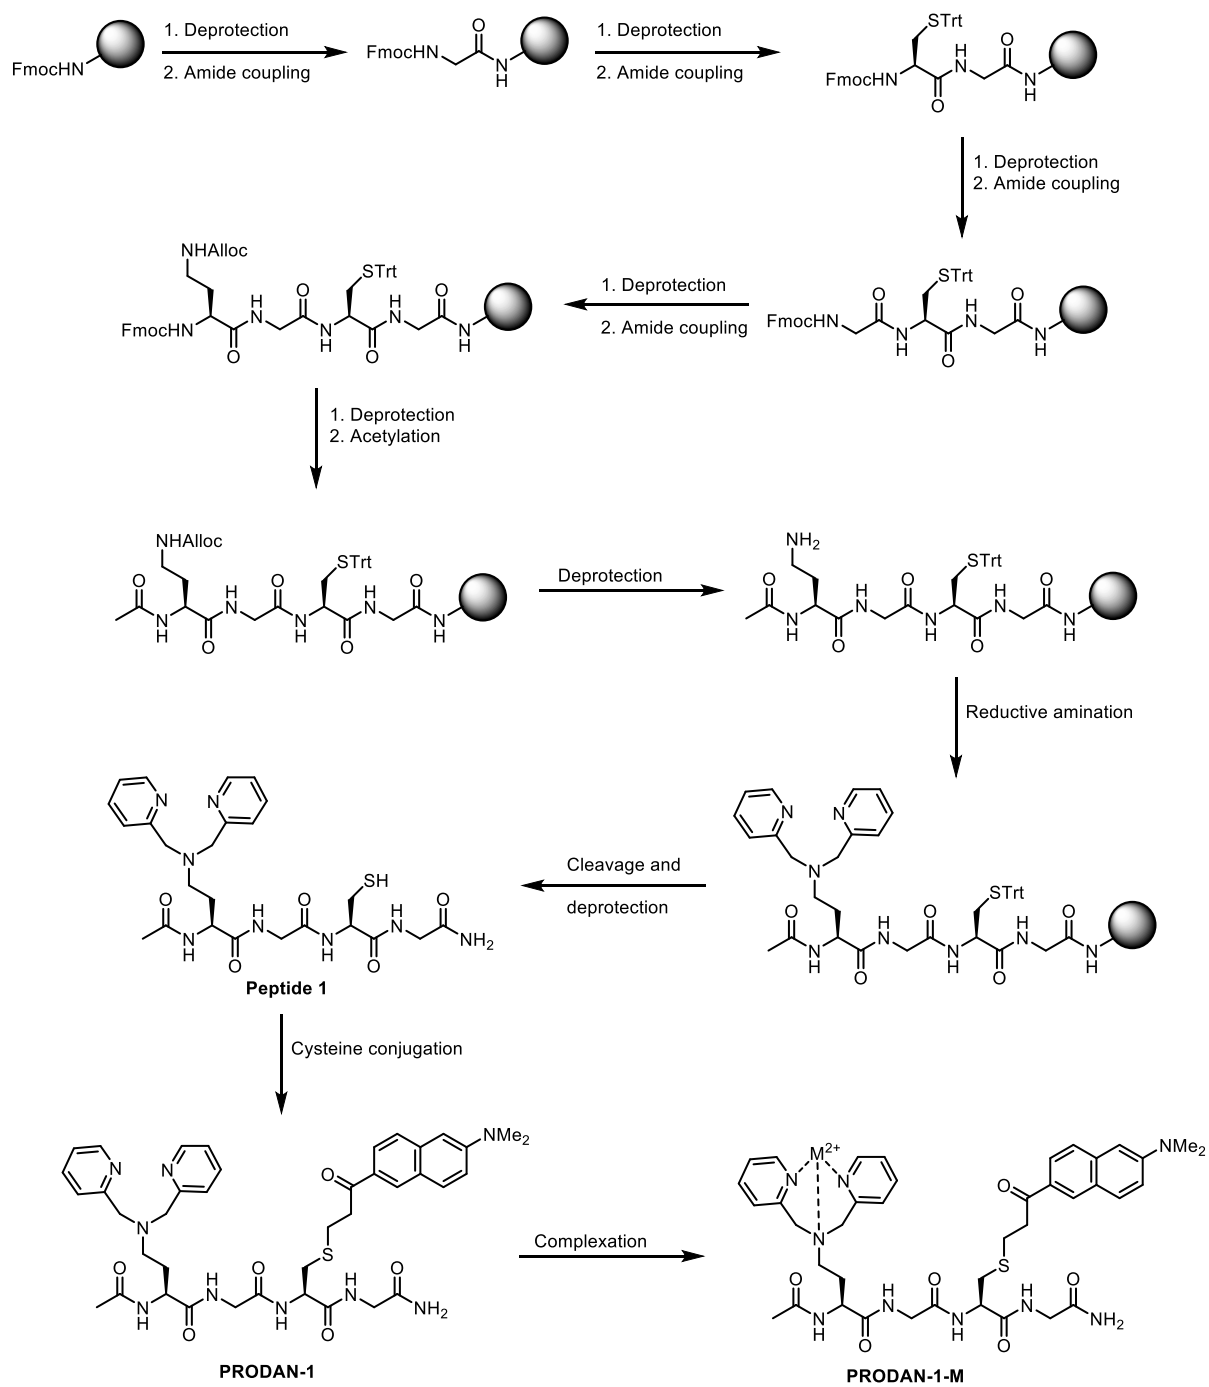

## NBD-1

Peptide 1 was synthesised on Rink amide resin (212 mg, 0.463 mol/g loading), following the procedure outlined above. Following purification and lyophilisation, the peptide was obtained as a fluffy orange solid (45 mg, 72 %).  $^1\text{H}$  NMR (400 MHz, DMSO-*d*6)  $\delta$  9.52 (broad s, 1H), 8.50 (d,  $J$  = 8.8 Hz, 1H), 8.47 – 8.43 (m, 2H), 8.08 – 8.02 (m, 2H), 7.75 – 7.69 (m, 2H), 7.45 (d,  $J$  = 7.7 Hz, 2H), 7.24 – 7.19 (m, 2H), 7.17 (s, 1H), 7.05 (s, 1H), 6.39 (d,  $J$  = 8.8 Hz, 1H), 4.31 – 4.22 (m, 1H), 3.83 – 3.50 (m, 6H), 3.49 – 3.39 (m, 2H), 2.64 – 2.50 (m, 2H), 2.12 – 2.04 (m, 2H), 2.02 – 1.91 (m, 1H), 1.79 – 1.60 (m, 3H), 1.56 – 1.43 (m, 2H) 1.38 – 1.27 (m, 2H);  $^{13}\text{C}$  NMR (101 MHz, DMSO-*d*6)  $\delta$  172.5, 171.9, 170.8, 158.9\*, 148.6, 145.1\*, 137.9\*, 136.4, 122.7, 122.0, 119.7\*, 99.0\*, 59.3, 51.2, 50.4, 43.2, 41.9, 34.9, 28.9, 27.3\*, 26.0, 24.7; HRMS (ESI) Calc. for  $\text{C}_{30}\text{H}_{37}\text{N}_{10}\text{O}_6$  (M+H) $^+$  633.28921, found 633.28880;  $[\alpha]_D^{22.7} = +9.4$  (c = 0.25, MeOH).

\*Broad peaks in  $^{13}\text{C}$  NMR. Identified from HSQC and HMBC experiments.

## NBD-1-Zn

A stock solution of  $\text{Zn}(\text{NO}_3)_2 \cdot 4\text{H}_2\text{O}$  in water (377  $\mu\text{L}$ , 0.0353 M) was added to a solution of **NBD-1** (8.41 mg, 0.0133 mmol) in  $\text{H}_2\text{O}$  (4.0 mL) and MeOH (2.0 mL). The resulting solution was stirred at room temperature for 2 hours. Following removal of the organic solvent under a flow of nitrogen and subsequent lyophilisation, the peptide was obtained as a fluffy orange solid.  $^1\text{H}$  NMR (400 MHz, MeOD)  $\delta$  8.75 – 8.69 (m, 2H), 8.50 (d,  $J$  = 8.8 Hz, 1H), 8.18 – 8.12 (m, 2H), 7.72 – 7.64 (m, 4H), 6.35 (d,  $J$  = 8.8 Hz, 1H), 4.37 (dd,  $J$  = 16.1 Hz, 7.1 Hz, 2H), 4.15 (dd,  $J$  = 16.1 Hz, 2.9 Hz, 2H), 4.11 – 4.06 (m, 1H), 3.83 – 3.72 (m, 2H), 3.60 – 3.45 (m, 2H), 2.84 – 2.74 (m, 2H), 2.25 – 2.16 (m, 2H), 2.13 – 2.02 (m, 1H), 1.99 – 1.87 (m, 1H), 1.80 – 1.70 (m, 2H), 1.65 – 1.55 (m, 2H), 1.46 – 1.36 (m, 2H);  $^{13}\text{C}$  NMR (101 MHz, MeOD)  $\delta$  176.4, 174.0, 173.7, 156.6, 156.4, 149.4, 145.9\*, 142.8, 142.7, 138.6, 126.4, 126.12, 126.08, 123.0\*, 99.9\*, 58.5, 57.9, 53.1, 52.3, 42.9, 36.4, 29.0\*, 27.5, 26.8, 26.2; HRMS (ESI) Calc. for  $\text{C}_{30}\text{H}_{36}\text{N}_{10}\text{O}_6\text{Zn}^{2+}$  (M) $^{2+}$  348.10499, found 348.10497.

\*Broad peaks in  $^{13}\text{C}$  NMR. Identified from HSQC and HMBC experiments.

## NBD-2

NBD-2 was synthesised on Rink amide resin (383 mg, 0.463 mol/g loading), following the procedure outlined above. The crude peptide pellet obtained from cleavage off the resin was dissolved in MeOH (2 mL), followed by addition of DIPEA (155  $\mu\text{L}$ , 0.885 mmol) and 4-chloro-7-nitrobenzofurazan (46 mg, 0.230 mmol). The resulting solution was heated to 50  $^\circ\text{C}$  for 3 hours. Following completion of reaction, the solvent was removed *in vacuo*. The residue was partitioned between dichloromethane and dilute aqueous hydrochloric acid (pH 1). The aqueous phase was washed with dichloromethane (3x 30 mL), then lyophilised. Following purification and lyophilisation, the peptide was obtained as a fluffy orange solid (21 mg, 16 %).  $^1\text{H}$  NMR (500 MHz, DMSO-*d*6)  $\delta$  9.42 (broad s, 1H), 8.53 – 8.42 (m, 3H), 8.21 (t,  $J$  = 5.8 Hz, 1H), 8.16 – 8.08 (m, 2H), 7.93 – 7.86 (m, 1H), 7.77 – 7.67 (m, 2H), 7.49 – 7.42 (m, 2H), 7.26 –



7.19 (m, 2H), 7.16 (s, 1H), 7.05 (s, 1H), 6.43 – 6.35 (m, 1H), 4.31 – 4.17 (m, 2H), 3.85 – 3.54 (m, 11H), 2.61 – 2.52 (m, 2H), 1.99 – 1.92 (m, 2H), 1.77 (s, 3H), 1.76 – 1.53 (m, 5H), 1.45 – 1.30 (m, 2H);  $^{13}\text{C}$  NMR (125 MHz, DMSO-*d*6)  $\delta$  172.3, 171.6, 170.8, 169.8, 169.0, 148.7, 145.1, 144.2, 138.0, 136.6, 122.8, 122.2, 120.5, 99.2, 59.2, 52.6, 51.3, 50.3, 43.2, 42.2, 41.8, 31.2, 28.7, 27.2, 22.6, 22.5; HRMS (ESI) Calc. for  $\text{C}_{34}\text{H}_{43}\text{N}_{12}\text{O}_8$  (M+H) $^+$  747.33300, found 747.33213.

### NBD-2-Zn

A stock solution of  $\text{Zn}(\text{NO}_3)_2 \cdot 4\text{H}_2\text{O}$  in water (689  $\mu\text{L}$ , 0.0302 M) was added to a solution of **NBD-2** (15.53 mg, 0.0208 mmol) in  $\text{H}_2\text{O}$  (5.0 mL) and MeOH (4.0 mL). The resulting solution was stirred at room temperature for 2 hours. Following removal of the organic solvent under a flow of nitrogen and subsequent lyophilisation, the peptide was obtained as a fluffy orange solid.  $^1\text{H}$  NMR (500 MHz, DMSO-*d*6)  $\delta$  9.53 (s, 1H), 8.71 – 8.39 (m, 3H), 8.30 – 7.39 (m, 6H), 7.76 – 7.39 (m, 4H), 7.19 (s, 1H), 7.05 (s, 1H), 6.49 – 6.30 (m, 1H), 4.35 – 4.08 (m, 4H), 4.04 – 3.88 (m, 2H), 3.84 – 3.51 (m, 6H), 2.83 – 2.58 (m, 2H), 2.18 – 2.02 (m, 1H), 1.95 – 1.49 (m, 5H), 1.77 (s, 3H), 1.47 – 1.24 (m, 2H);  $^{13}\text{C}$  NMR (125 MHz, DMSO-*d*6)  $\delta$  171.7, 171.6, 170.8, 169.7, 168.8, 154.6, 145.2, 144.5, 144.2, 140.5, 138.0, 124.7, 124.5, 120.5, 99.2, 56.2, 52.7, 50.8, 43.2, 42.0, 41.8, 31.4, 27.2, 25.1, 22.7, 22.5; HRMS (ESI) Calc. for  $\text{C}_{34}\text{H}_{42}\text{N}_{12}\text{O}_8\text{Zn}^{2+}$  (M) $^{2+}$  405.12645, found 405.12668.

### Peptide 1

Peptide 1 was synthesised on Rink amide resin (244 mg, 0.463 g/mol loading), following the procedure outlined above. Following purification and lyophilisation, the peptide was obtained as a fluffy, pale green solid (56 mg, 89 %).  $^1\text{H}$  NMR (300 MHz, DMSO-*d*6)  $\delta$  8.50 – 8.44 (m, 2H), 8.28 (t,  $J = 5.7$  Hz, 1H), 8.19 (t,  $J = 6.0$  Hz, 1H), 8.16 – 8.12 (m, 1H), 7.94 (d,  $J = 7.7$  Hz, 1H), 7.72 (dd,  $J = 7.6$  Hz,  $J = 1.8$  Hz, 2H), 7.47 (d,  $J = 7.6$  Hz, 2H), 7.26 – 7.21 (m, 2H), 7.18 (s, 1H), 7.08 (s, 1H), 4.42 – 4.34 (m, 1H), 4.31 – 4.24 (m, 1H), 3.84 – 3.59 (m, 8H), 2.77 (broad s, 2H), 2.61 – 2.45 (m, 3H), 2.03 – 1.91 (m, 1H), 1.84 – 1.66 (m, 4H);  $^{13}\text{C}$  NMR (101 MHz, DMSO-*d*6)  $\delta$  172.5, 170.6, 169.8, 169.7, 169.1, 159.1, 148.7, 136.4, 122.7, 122.0, 59.4, 55.2, 51.4, 50.2, 42.2, 42.0, 28.9, 26.0, 22.4; HRMS (ESI) Calc. for  $\text{C}_{25}\text{H}_{33}\text{N}_8\text{O}_5\text{S}$  (M-H) $^-$  557.23001, found 557.22977;  $[\alpha]_D^{21.8} = +19.4$  ( $c = 0.25$ , MeOH).

### PRODAN-1

A solution of acrylodan (35 mg, 0.156 mmol) in MeCN (5 mL) was added to a solution of **Peptide 1** (29 mg, 0.0519 mmol) in 5 mM HEPES buffer (pH 7, 5 mL) at room temperature. The resulting solution was agitated for 4 hours, at which point the solvent was removed by lyophilisation. Following purification and lyophilisation, the peptide was obtained as a fluffy, pale green solid (22 mg, 54 %).  $^1\text{H}$  NMR (400 MHz, MeOD)  $\delta$  8.46 – 8.36 (m, 3H), 7.88 – 7.81 (m, 2H), 7.75 – 7.68 (m, 2H), 7.63 (d,  $J = 8.8$  Hz, 1H), 7.50 – 7.45 (m, 2H), 7.26 – 7.19 (m, 3H), 6.94 – 6.90 (m, 1H), 4.56 – 4.50 (m, 1H), 4.45 – 4.39 (m, 1H), 3.95 – 3.78 (m, 6H), 3.72 – 3.64

(m, 2H), 3.15 – 3.07 (m, 1H), 3.09 (s, 6H), 2.99 – 2.89 (m, 3H), 2.72 – 2.60 (m, 2H), 2.14 – 2.03 (m, 1H), 1.91 – 1.77 (m, 4H);  $^{13}\text{C}$  NMR (101 MHz, MeOD)  $\delta$  200.5, 175.5, 174.1, 173.7, 172.1, 160.3, 152.2, 149.6, 139.4, 138.5, 131.9, 131.8, 131.5, 131.5, 127.4, 127.3, 126.6, 125.1, 123.70, 123.67, 117.6, 106.4, 61.1, 55.0, 54.5, 54.0, 52.4, 43.9, 43.6, 43.5, 40.5, 34.6, 30.2, 30.0, 27.9, 22.7; HRMS (ESI) Calc. for  $\text{C}_{40}\text{H}_{50}\text{N}_9\text{O}_6\text{S}$  ( $\text{M}+\text{H}$ ) $^+$  784.35993, found 784.35927;  $[\alpha]_D^{22.1} = -6.9$  (c = 0.25, MeOH).

### PRODAN-1-Zn

A stock solution of  $\text{Zn}(\text{NO}_3)_2 \cdot 4\text{H}_2\text{O}$  in water (614  $\mu\text{L}$ , 0.0109 M) was added to a solution of **PRODAN-1** (5.23 mg, 0.00671 mmol) in  $\text{H}_2\text{O}$  (3.0 mL) and MeOH (3.0 mL). The resulting solution was stirred at room temperature for 2 hours. Following removal of the organic solvent under a flow of nitrogen and subsequent lyophilisation, the peptide was obtained as a fluffy pale green solid.  $^1\text{H}$  NMR (400 MHz, MeOD)  $\delta$  8.73 – 8.64 (m, 2H), 8.42 (s, 1H), 8.18 – 8.09 (m, 2H), 7.86 (d,  $J = 8.8$  Hz, 1H), 7.71 – 7.59 (m, 5H), 7.29 – 7.22 (m, 1H), 6.94 (s, 1H), 4.65 – 4.54 (m, 2H), 4.52 – 4.45 (m, 1H), 4.40 – 4.31 (m, 2H), 4.13 – 4.04 (m, 3H), 3.97 – 3.80 (m, 5H), 3.46 – 3.40 (m, 1H), 3.15 – 3.06 (m, 8H), 3.01 – 2.88 (m, 3H), 2.80 – 2.71 (m, 2H), 2.12 – 2.00 (m, 1H), 1.98 – 1.91 (m, 1H), 1.89 (s, 3H);  $^{13}\text{C}$  NMR (101 MHz, MeOD)\*  $\delta$  200.2, 174.3, 173.7, 173.1, 171.6, 156.5, 156.3, 152.2, 149.3, 149.2, 142.8, 142.7, 139.5, 131.9, 131.6, 127.4, 126.5, 126.4, 126.2, 126.15, 125.1, 117.6, 106.4, 58.6, 58.0, 54.8, 53.1, 52.1, 43.6, 43.3, 40.5, 39.4, 34.7, 27.9, 26.9, 22.5; HRMS (ESI) Calc. for  $\text{C}_{40}\text{H}_{50}\text{N}_9\text{O}_6\text{SZn}^{2+}$  ( $\text{M}$ ) $^{2+}$  423.64035, found 423.64107;  $[\alpha]_D^{22.5} = -3.4$  (c = 0.25, MeOH).

\*Dipicolylamine groups appear as two separate sets of signals

# <sup>1</sup>H and <sup>13</sup>C NMR spectra

## NBD-1—<sup>1</sup>H NMR, 400 MHz, DMSO-d<sub>6</sub>

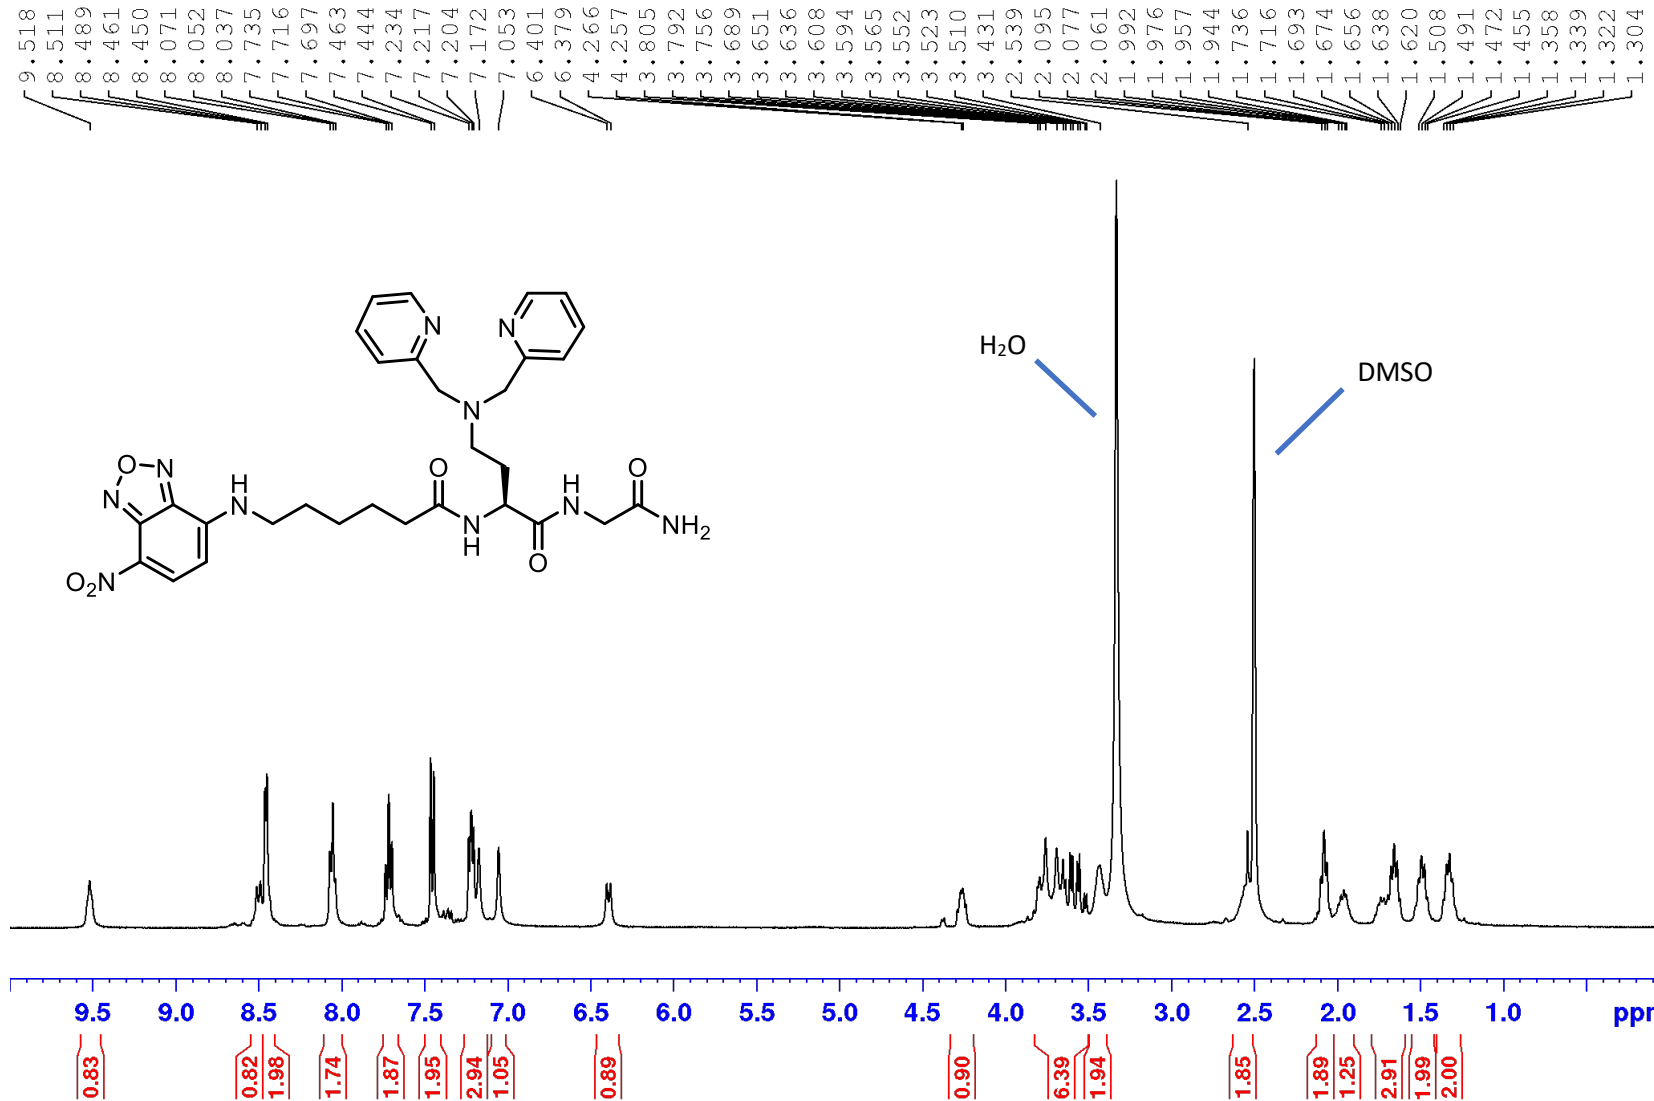

NBD-1—<sup>13</sup>C NMR, 101 MHz, DMSO-d<sub>6</sub>

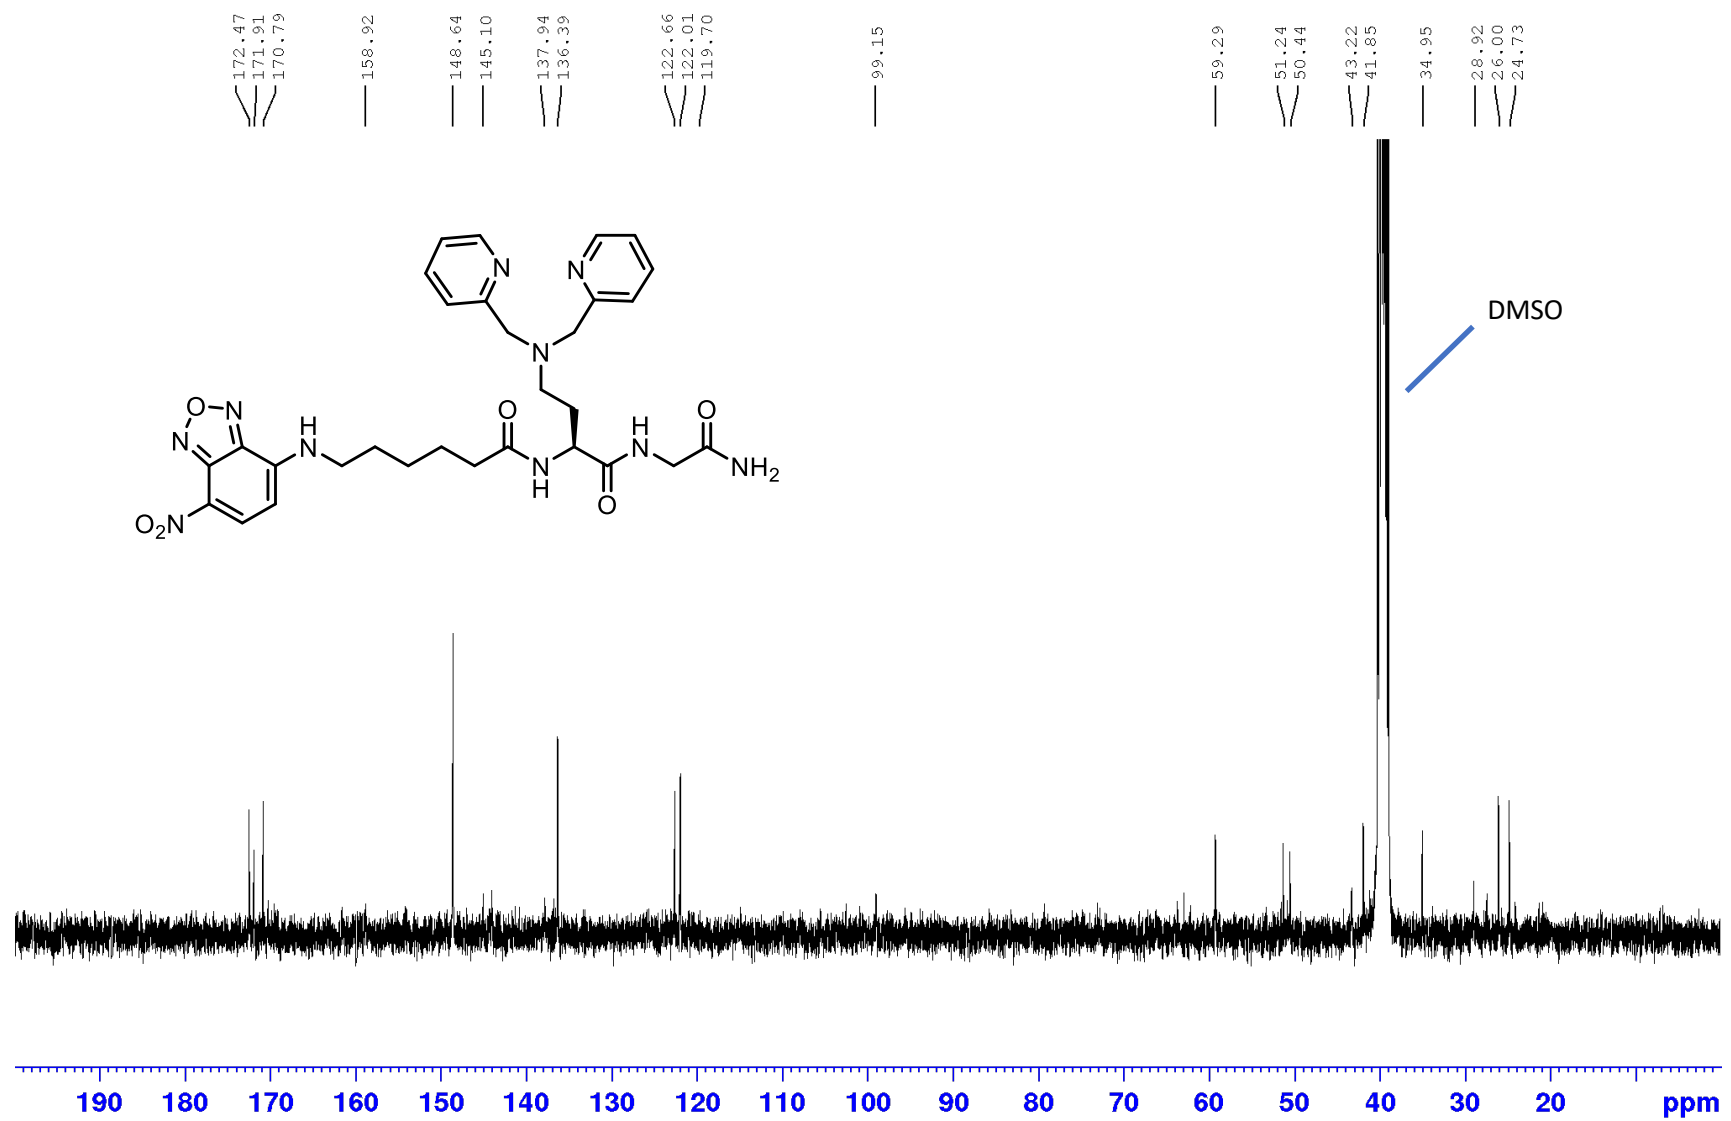

NBD-1-Zn-<sup>1</sup>H NMR, 400 MHz, MeOD

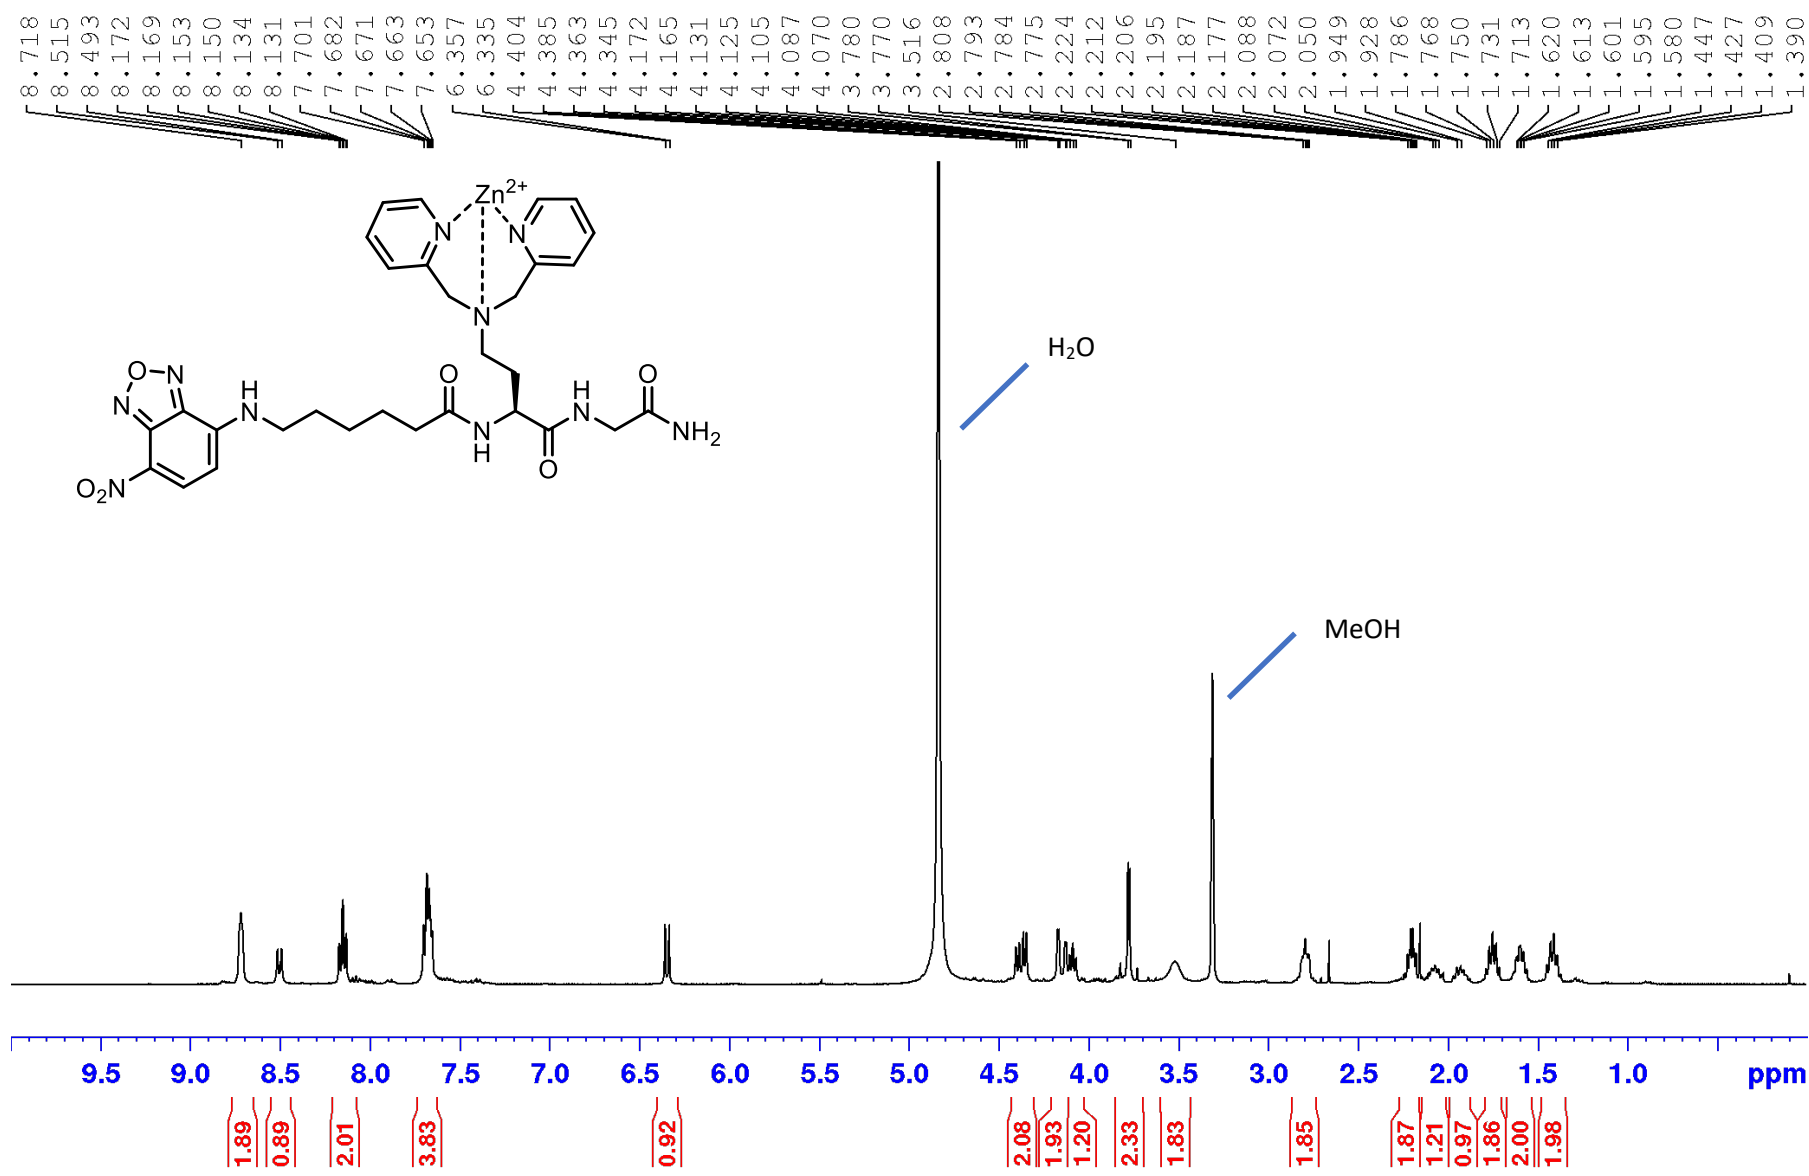

NBD-1-Zn—<sup>13</sup>C NMR, 101 MHz, MeOD

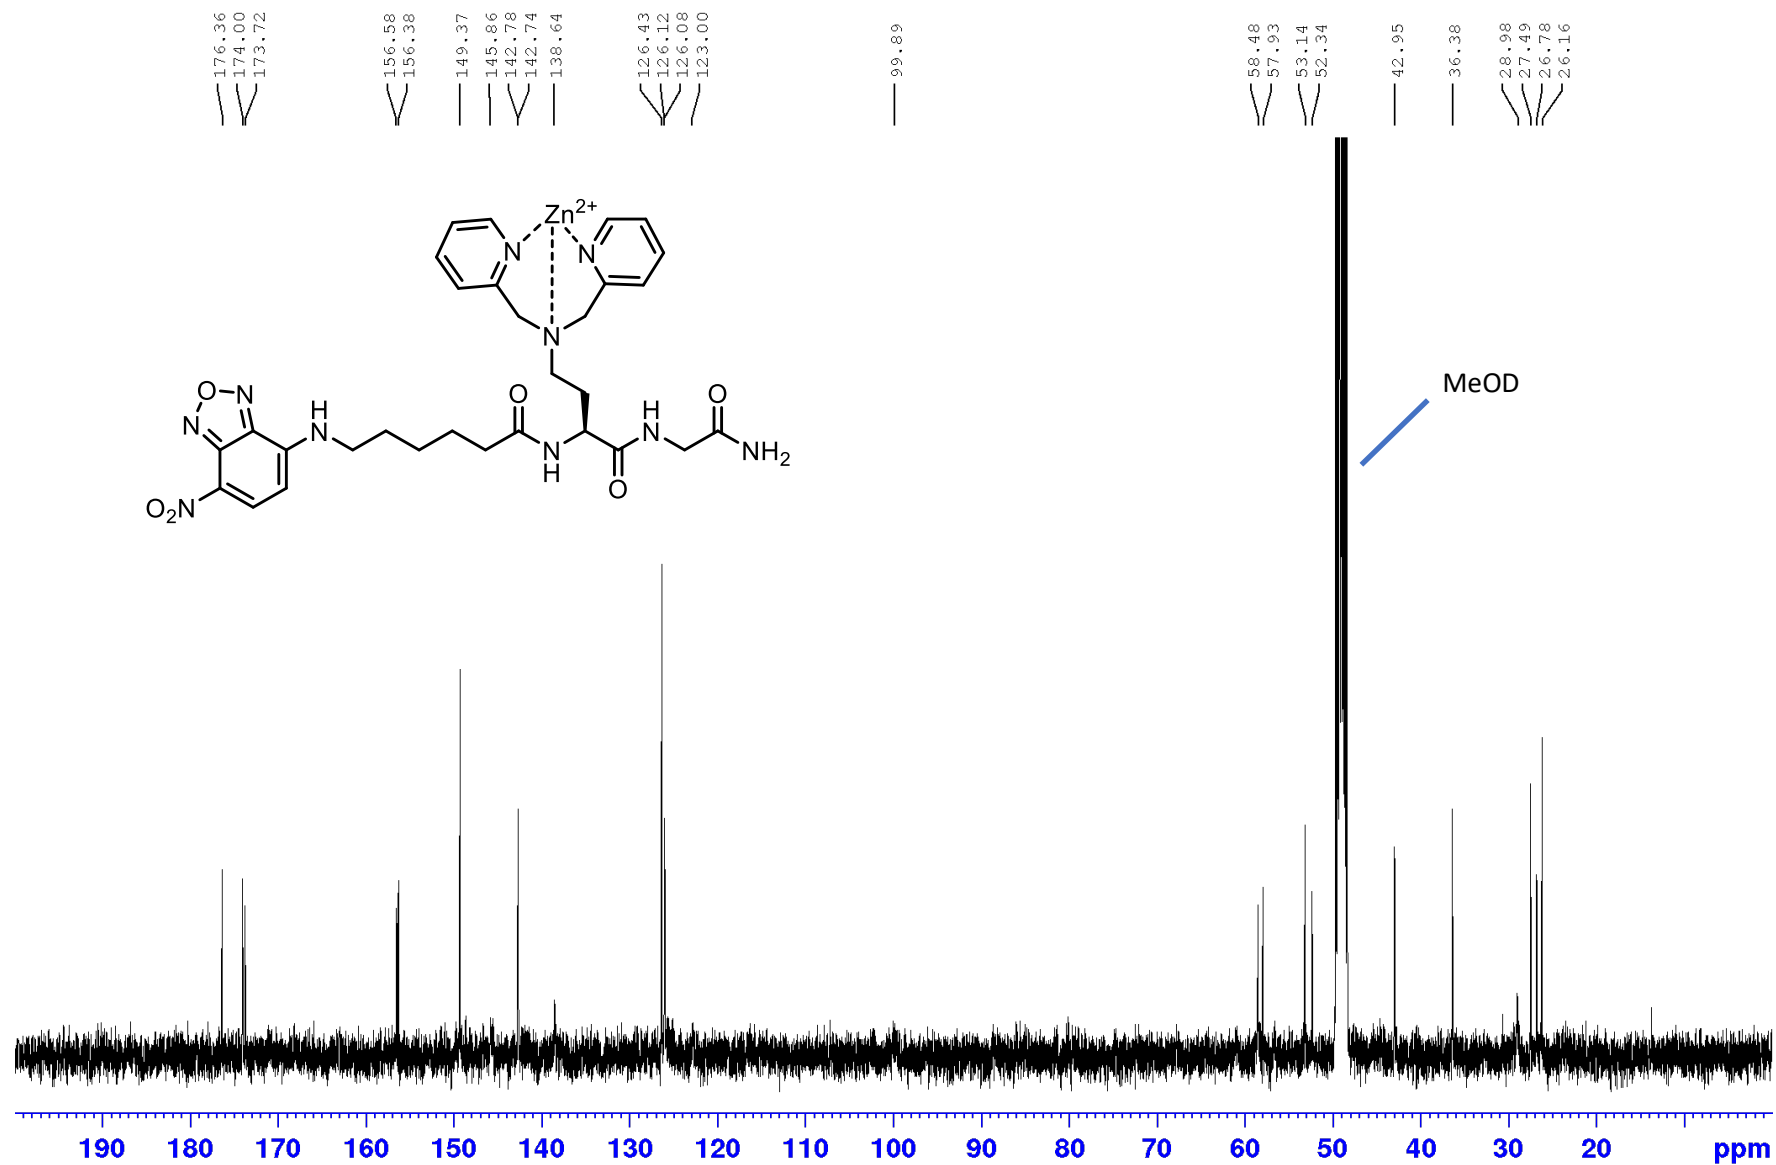

NBD-2—<sup>1</sup>H NMR, 500 MHz, DMSO-*d*<sub>6</sub>

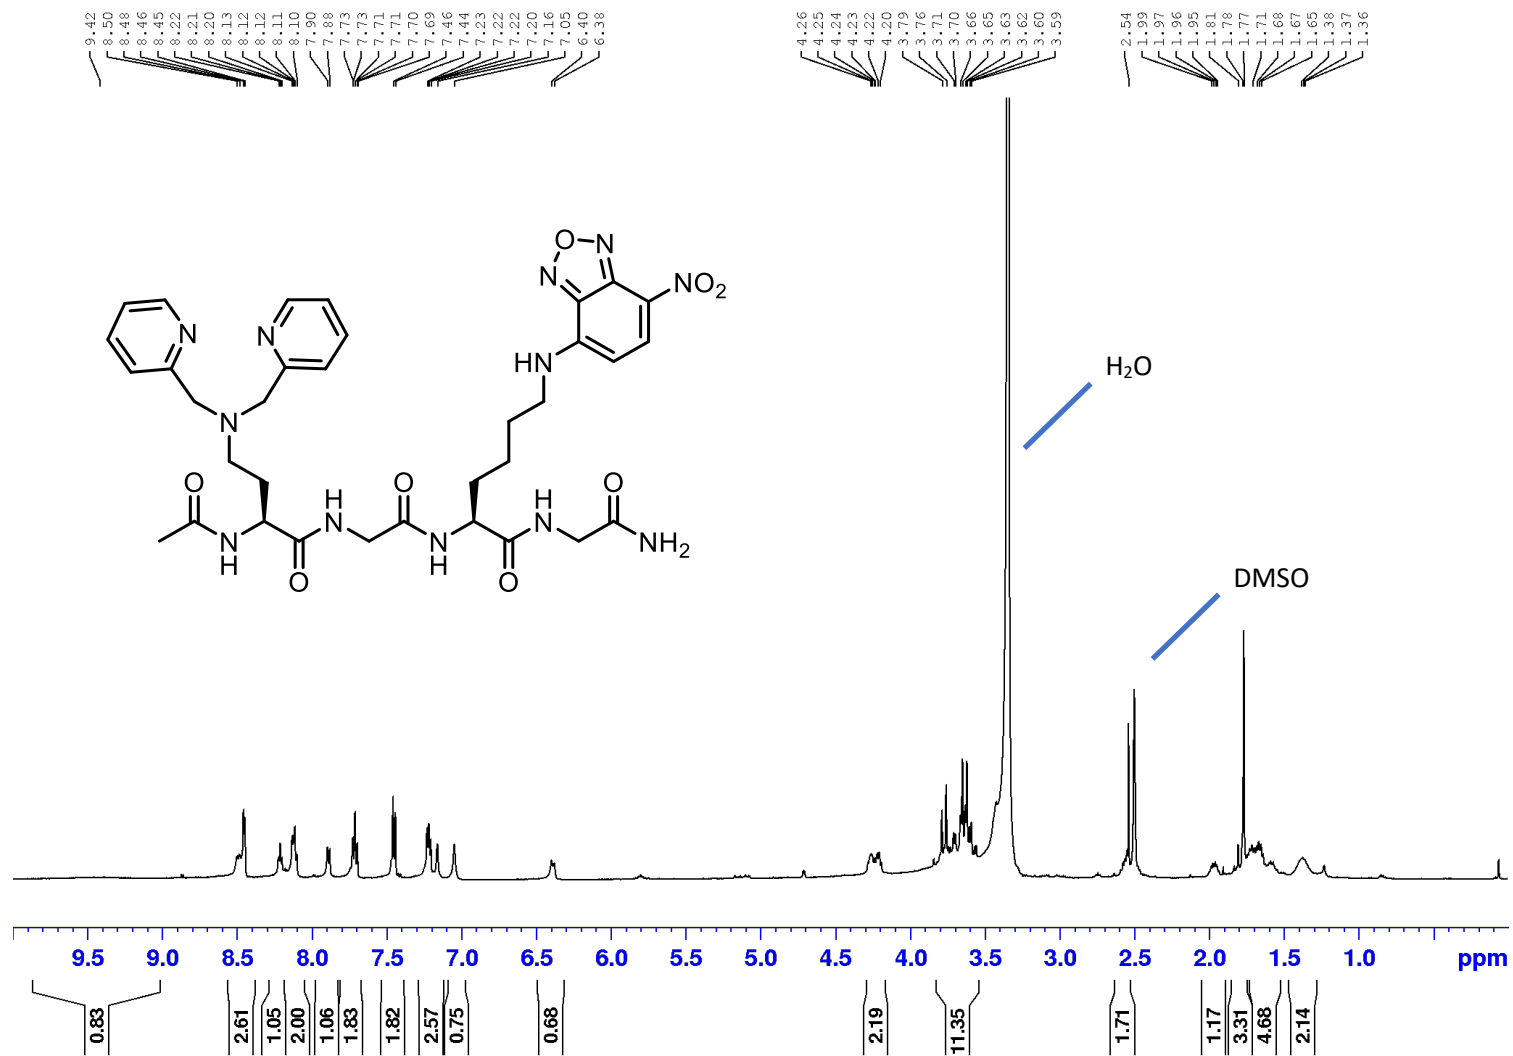





NBD-2-Zn-<sup>1</sup>H NMR, 500 MHz, DMSO-*d*<sub>6</sub>

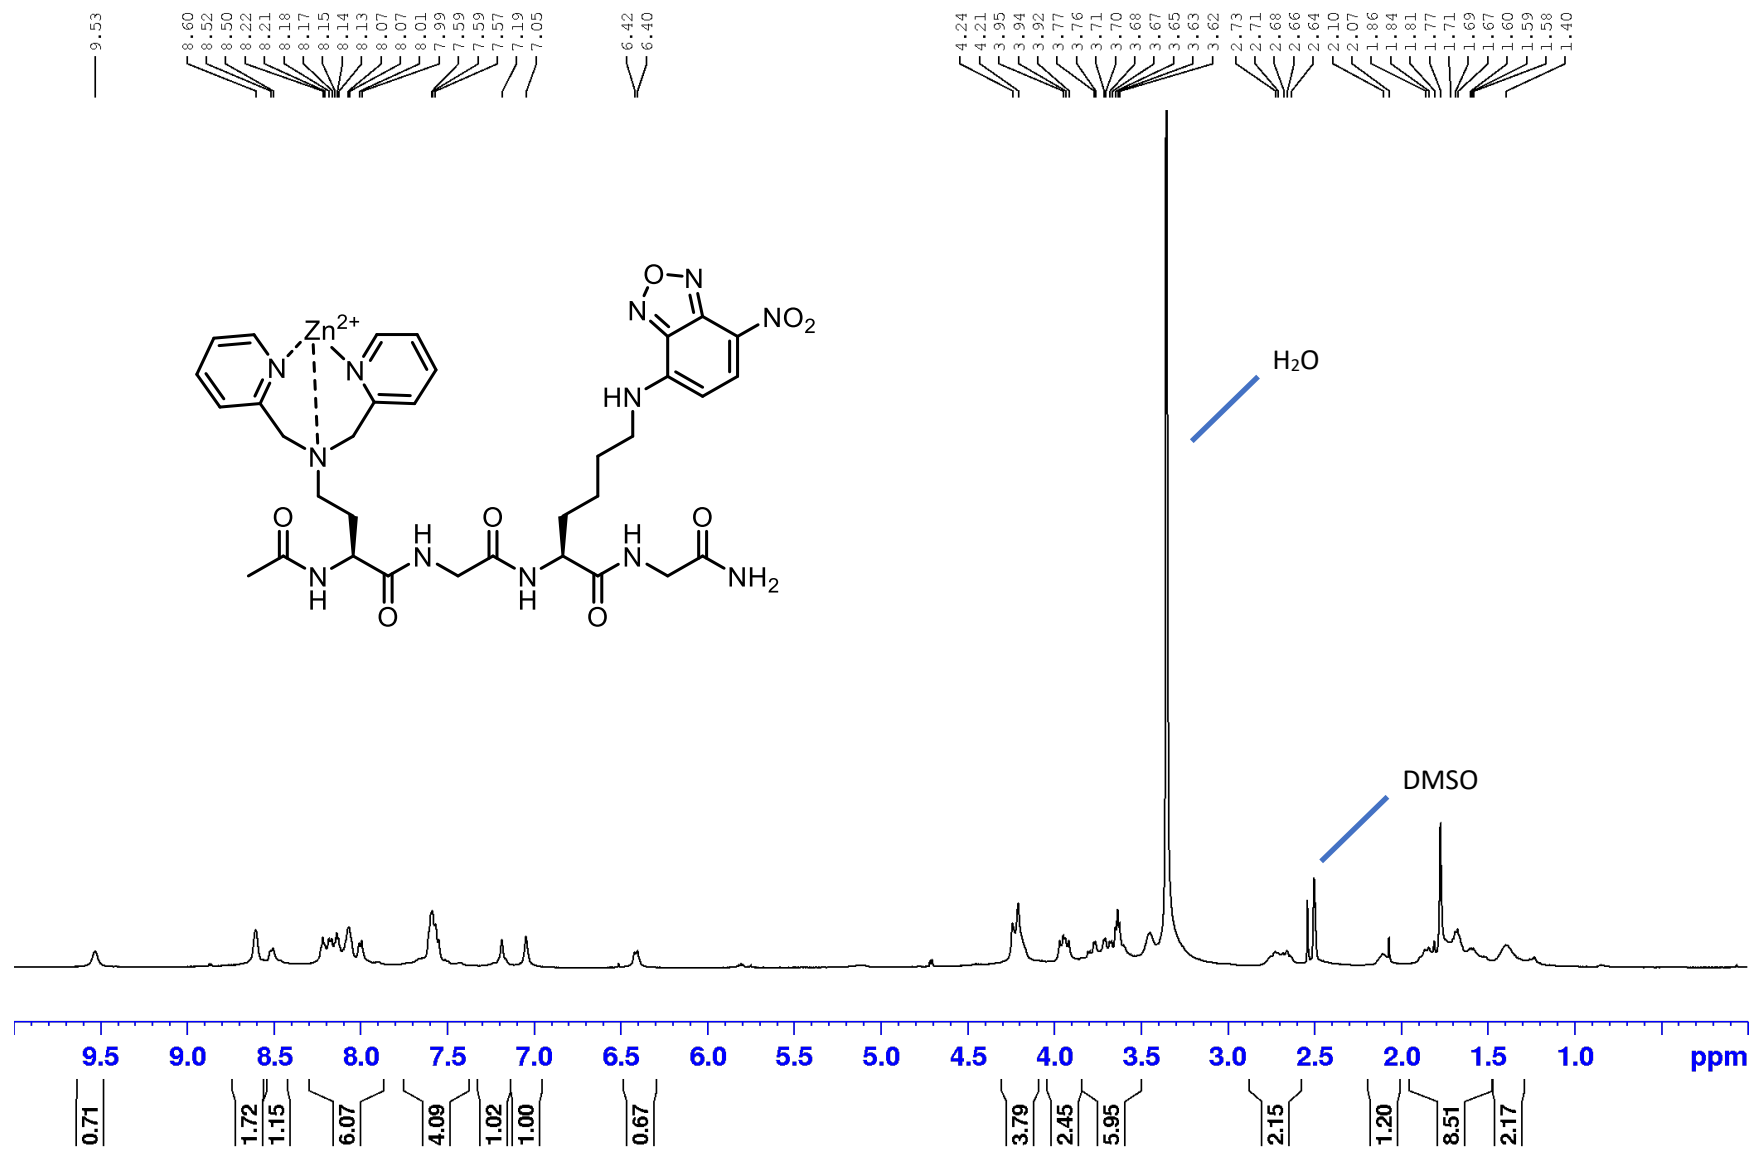

NBD-2-Zn—<sup>13</sup>C NMR, 125 MHz, DMSO-*d*<sub>6</sub>

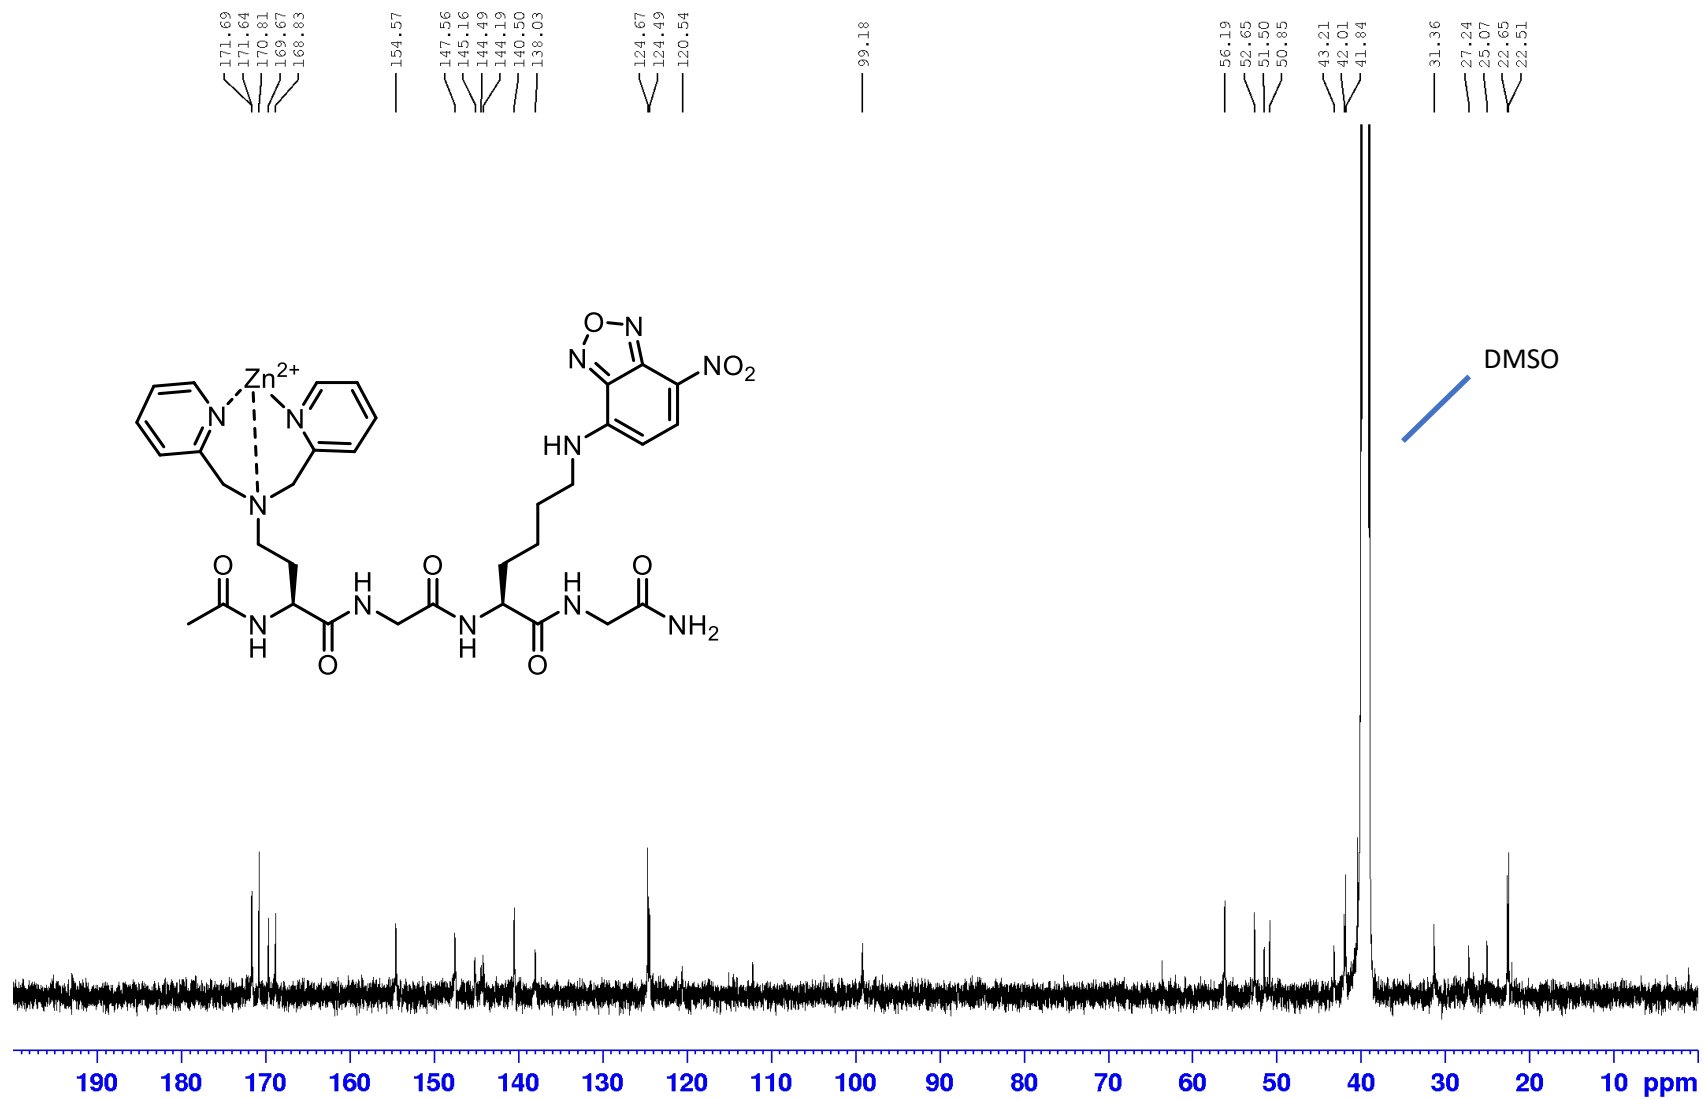

Peptide 1—<sup>1</sup>H NMR, 400 MHz, DMSO-d<sub>6</sub>

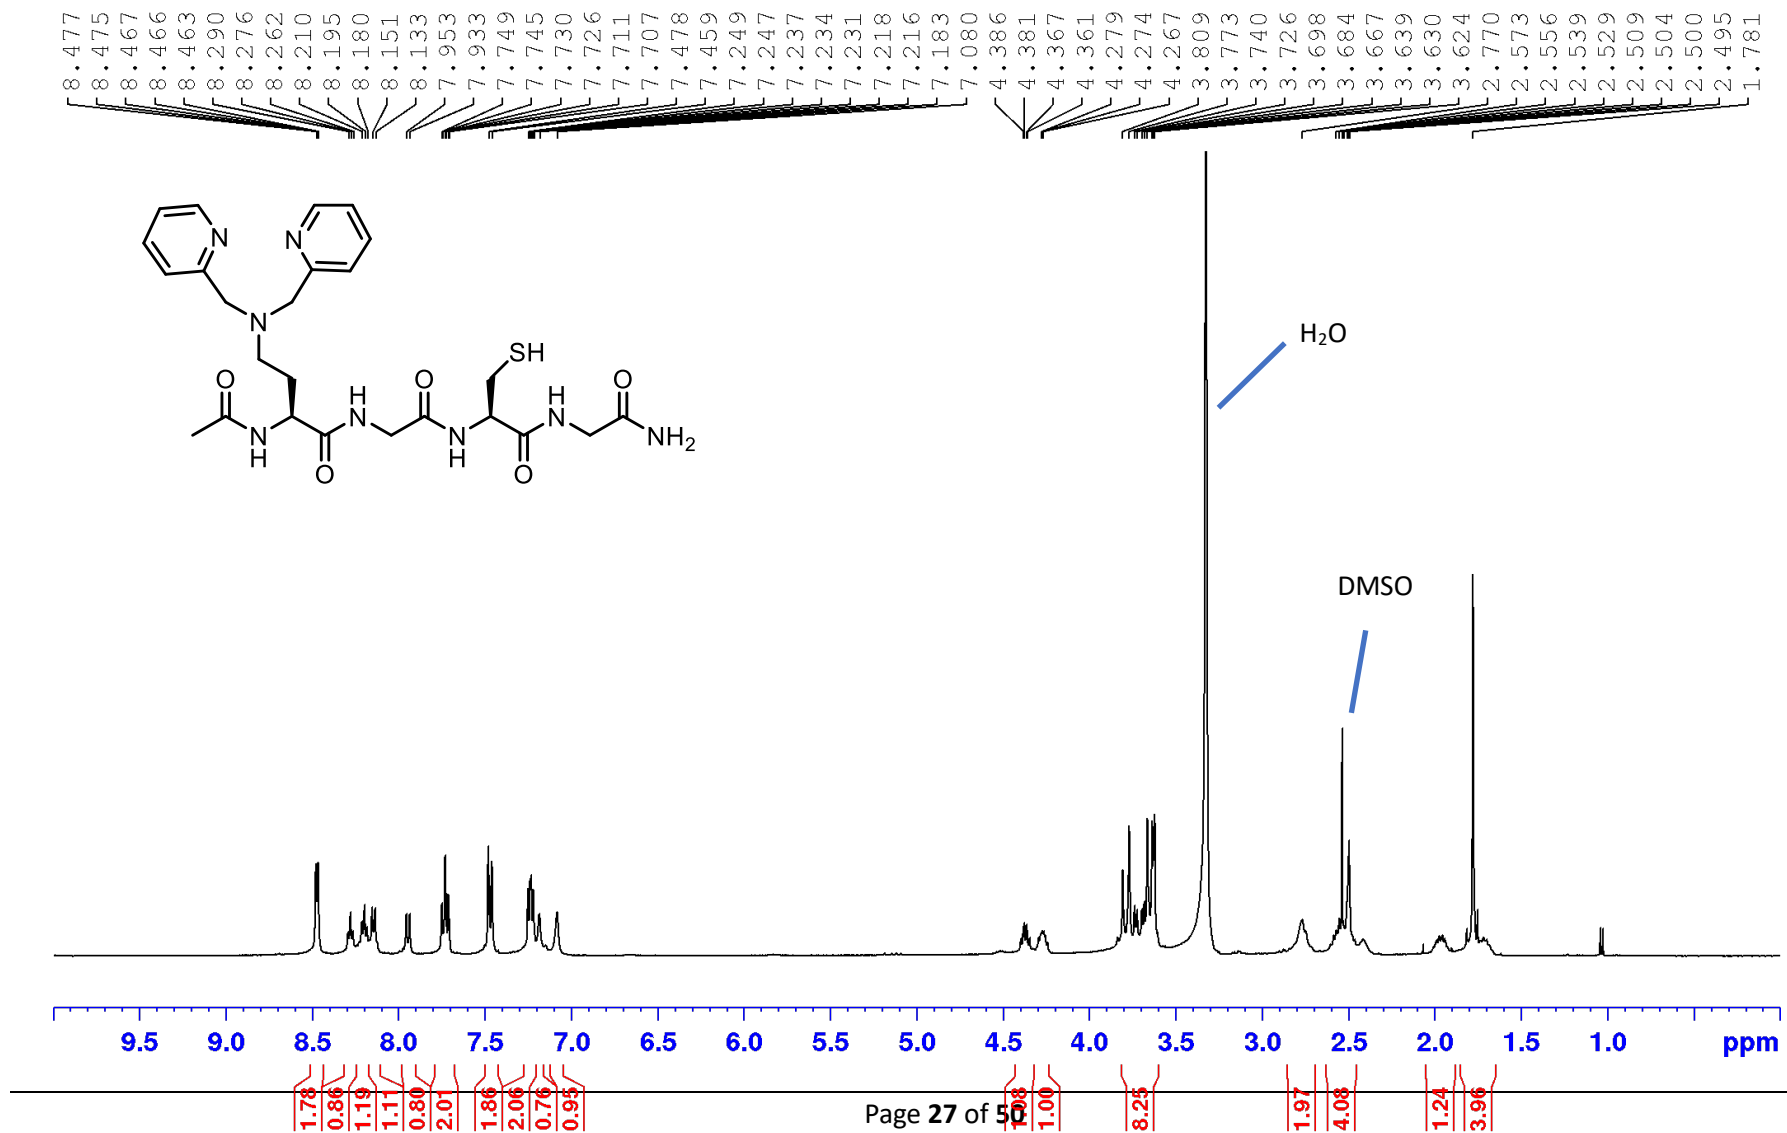

Peptide 1—<sup>13</sup>C NMR, 101 MHz, DMSO-d<sub>6</sub>

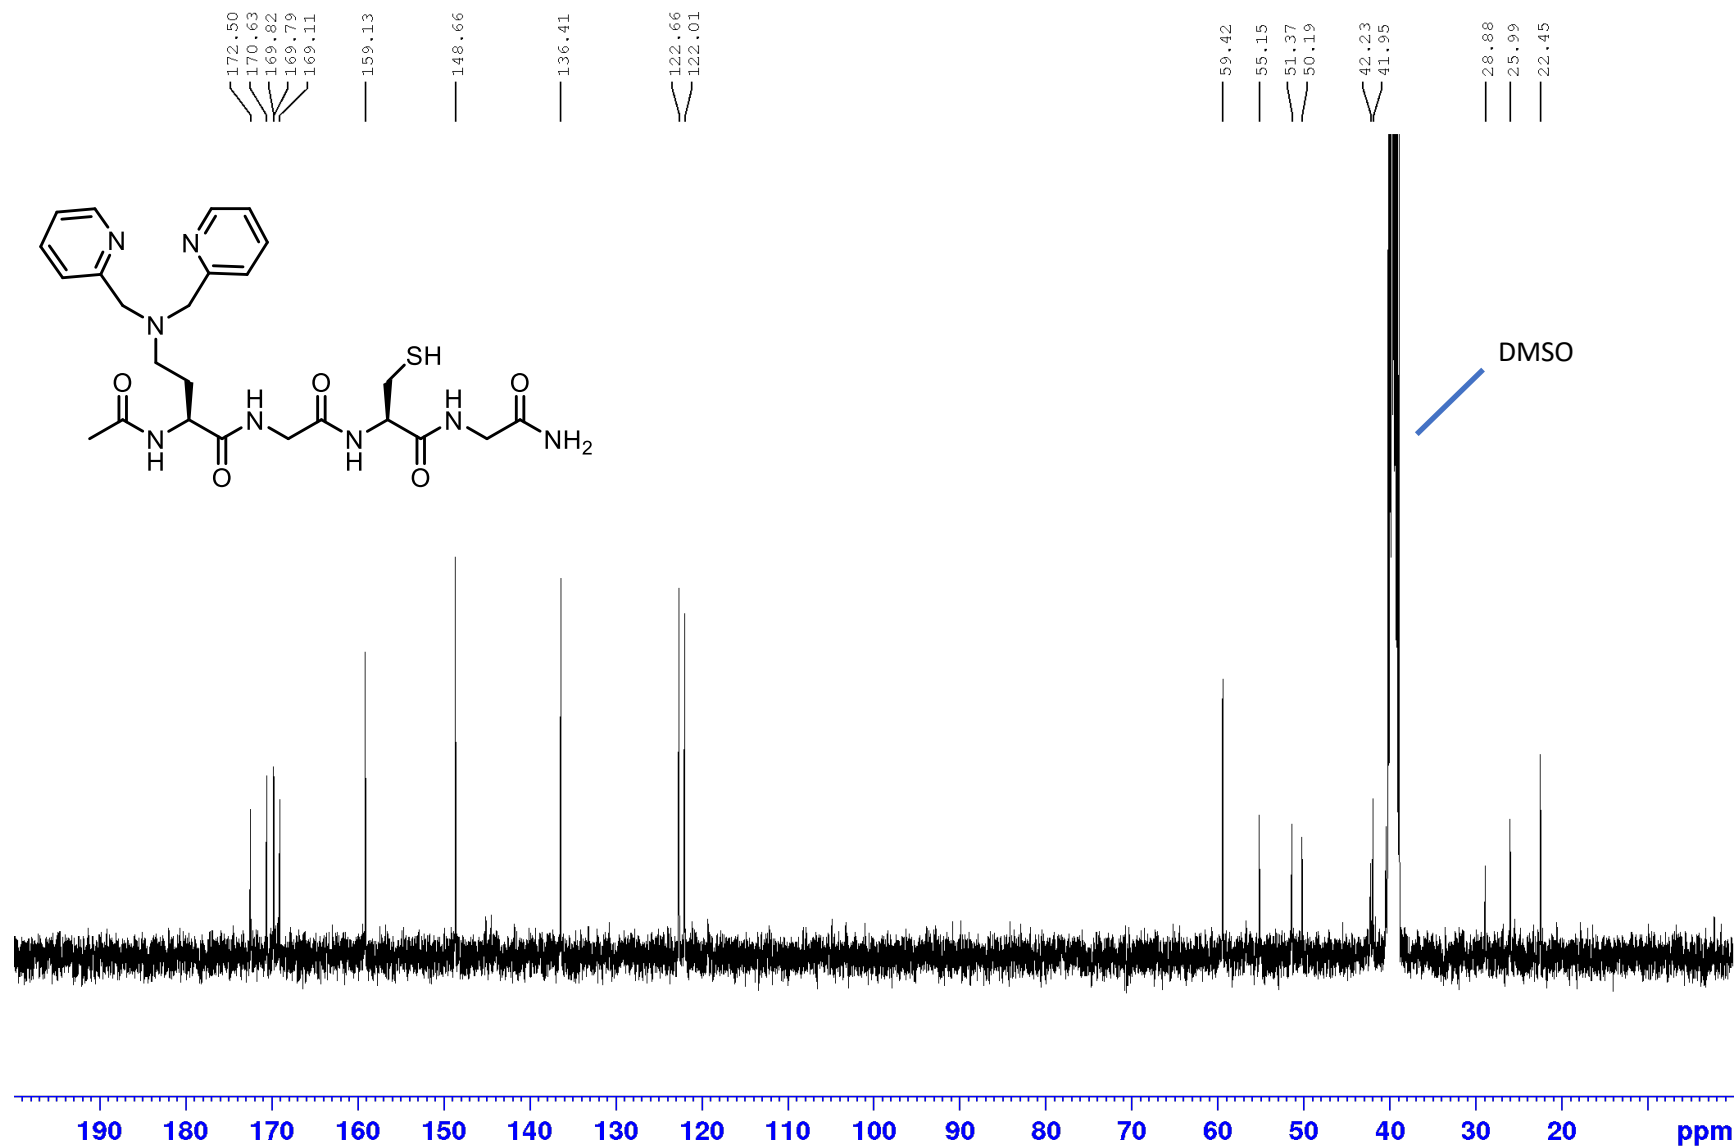

PRODAN-1—<sup>1</sup>H NMR, 400 MHz, MeOD

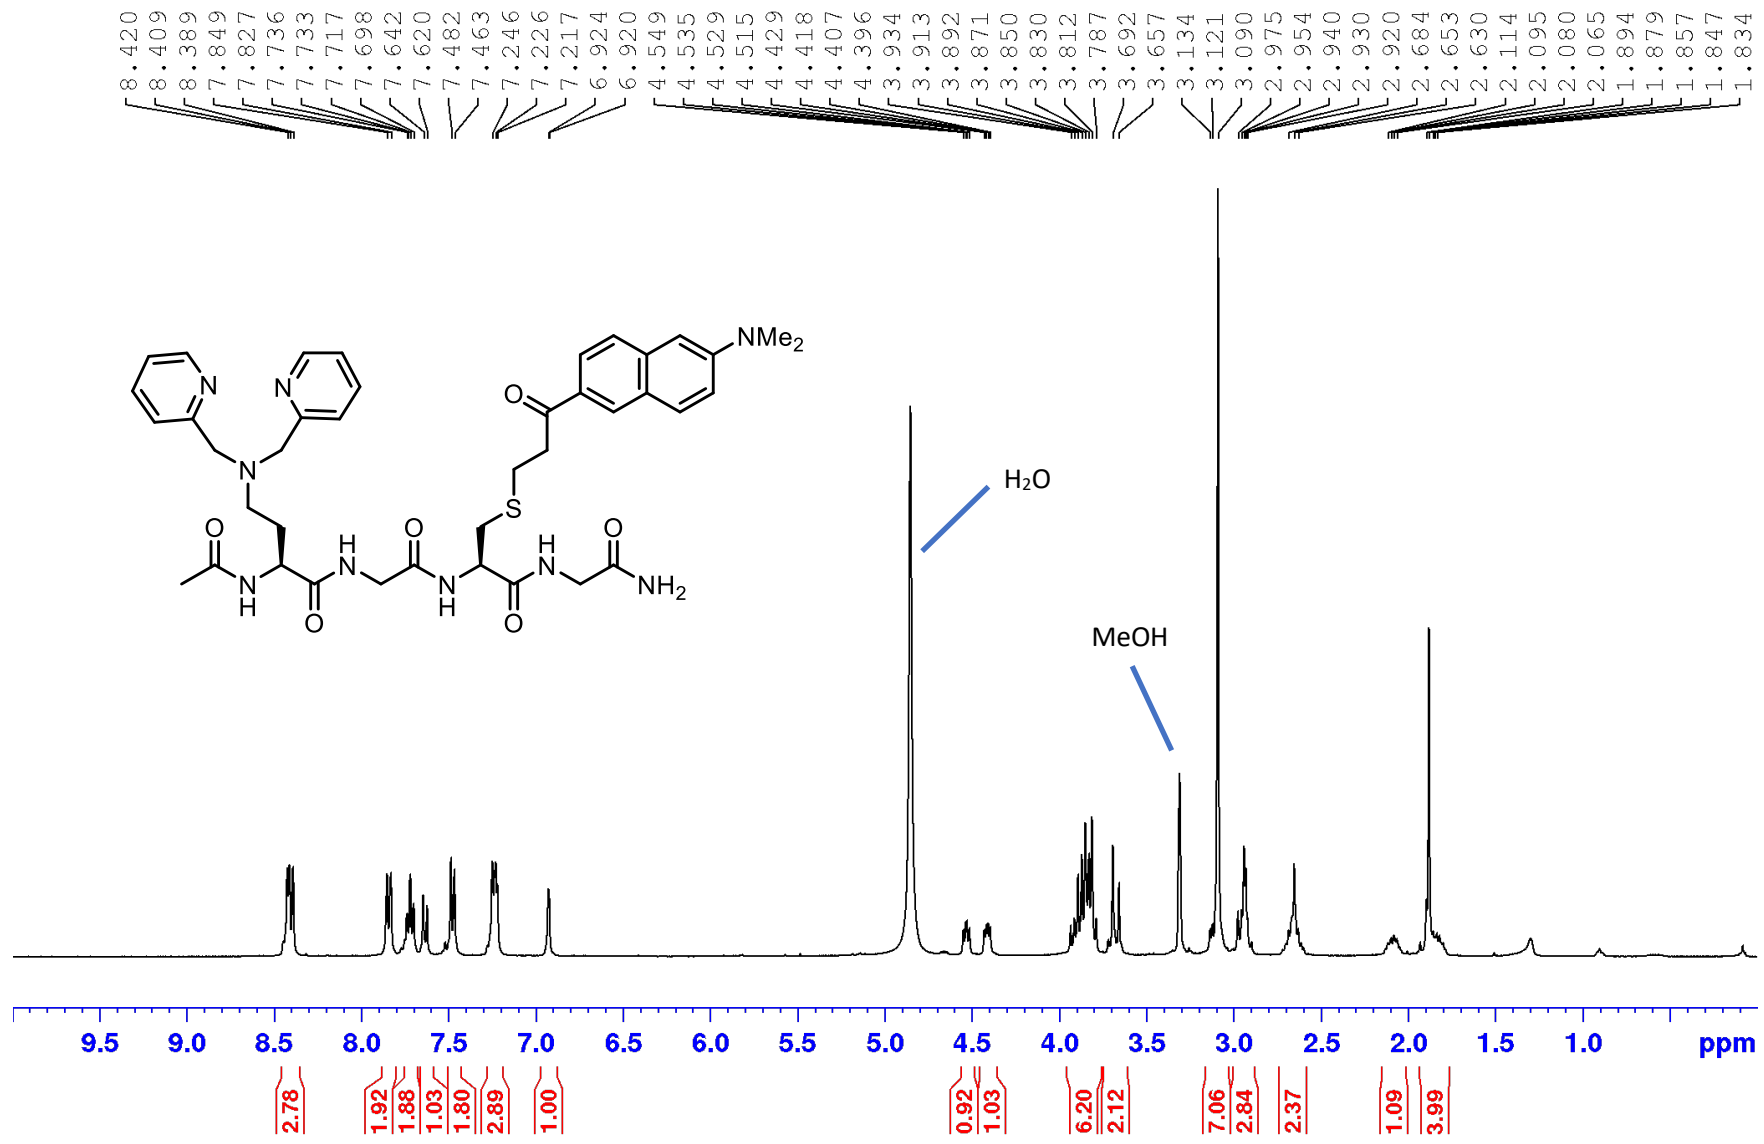

PRODAN-1—<sup>13</sup>C NMR, 101 MHz, MeOD

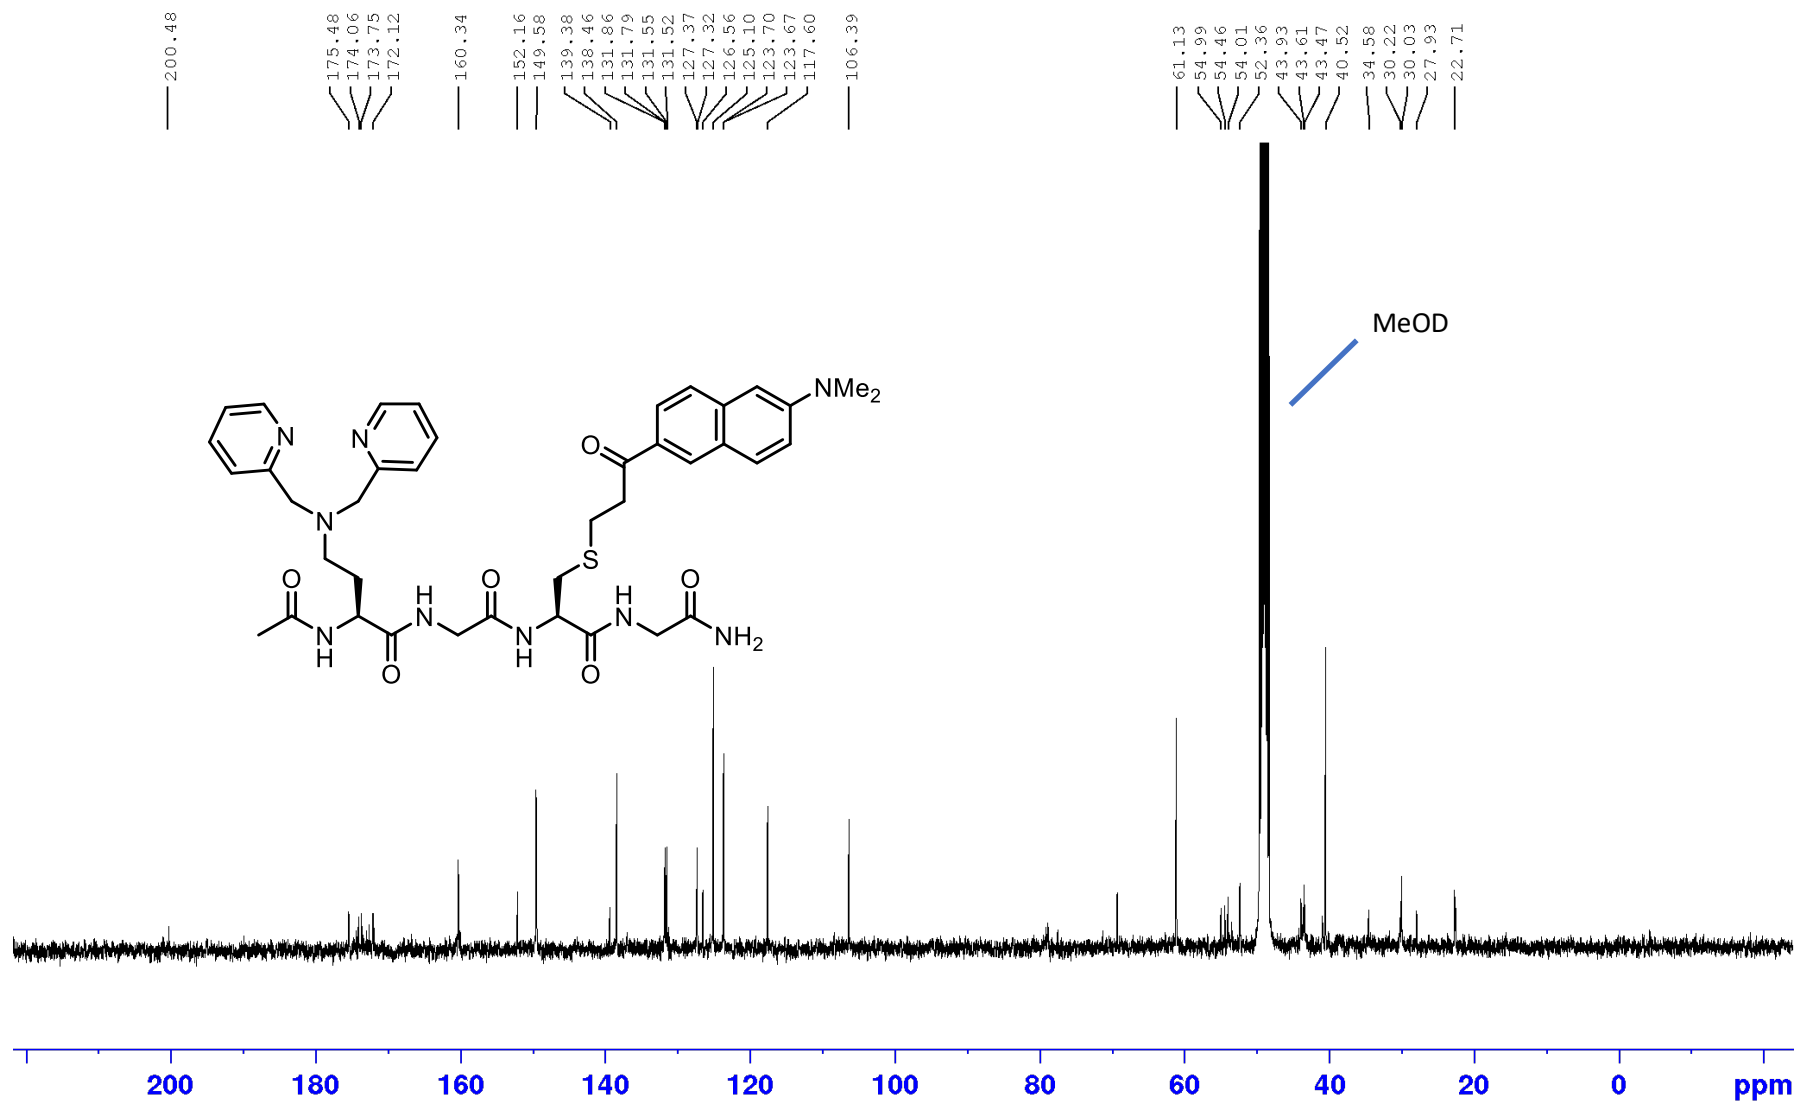

PRODAN-1-Zn—<sup>1</sup>H NMR, 400 MHz, MeOD

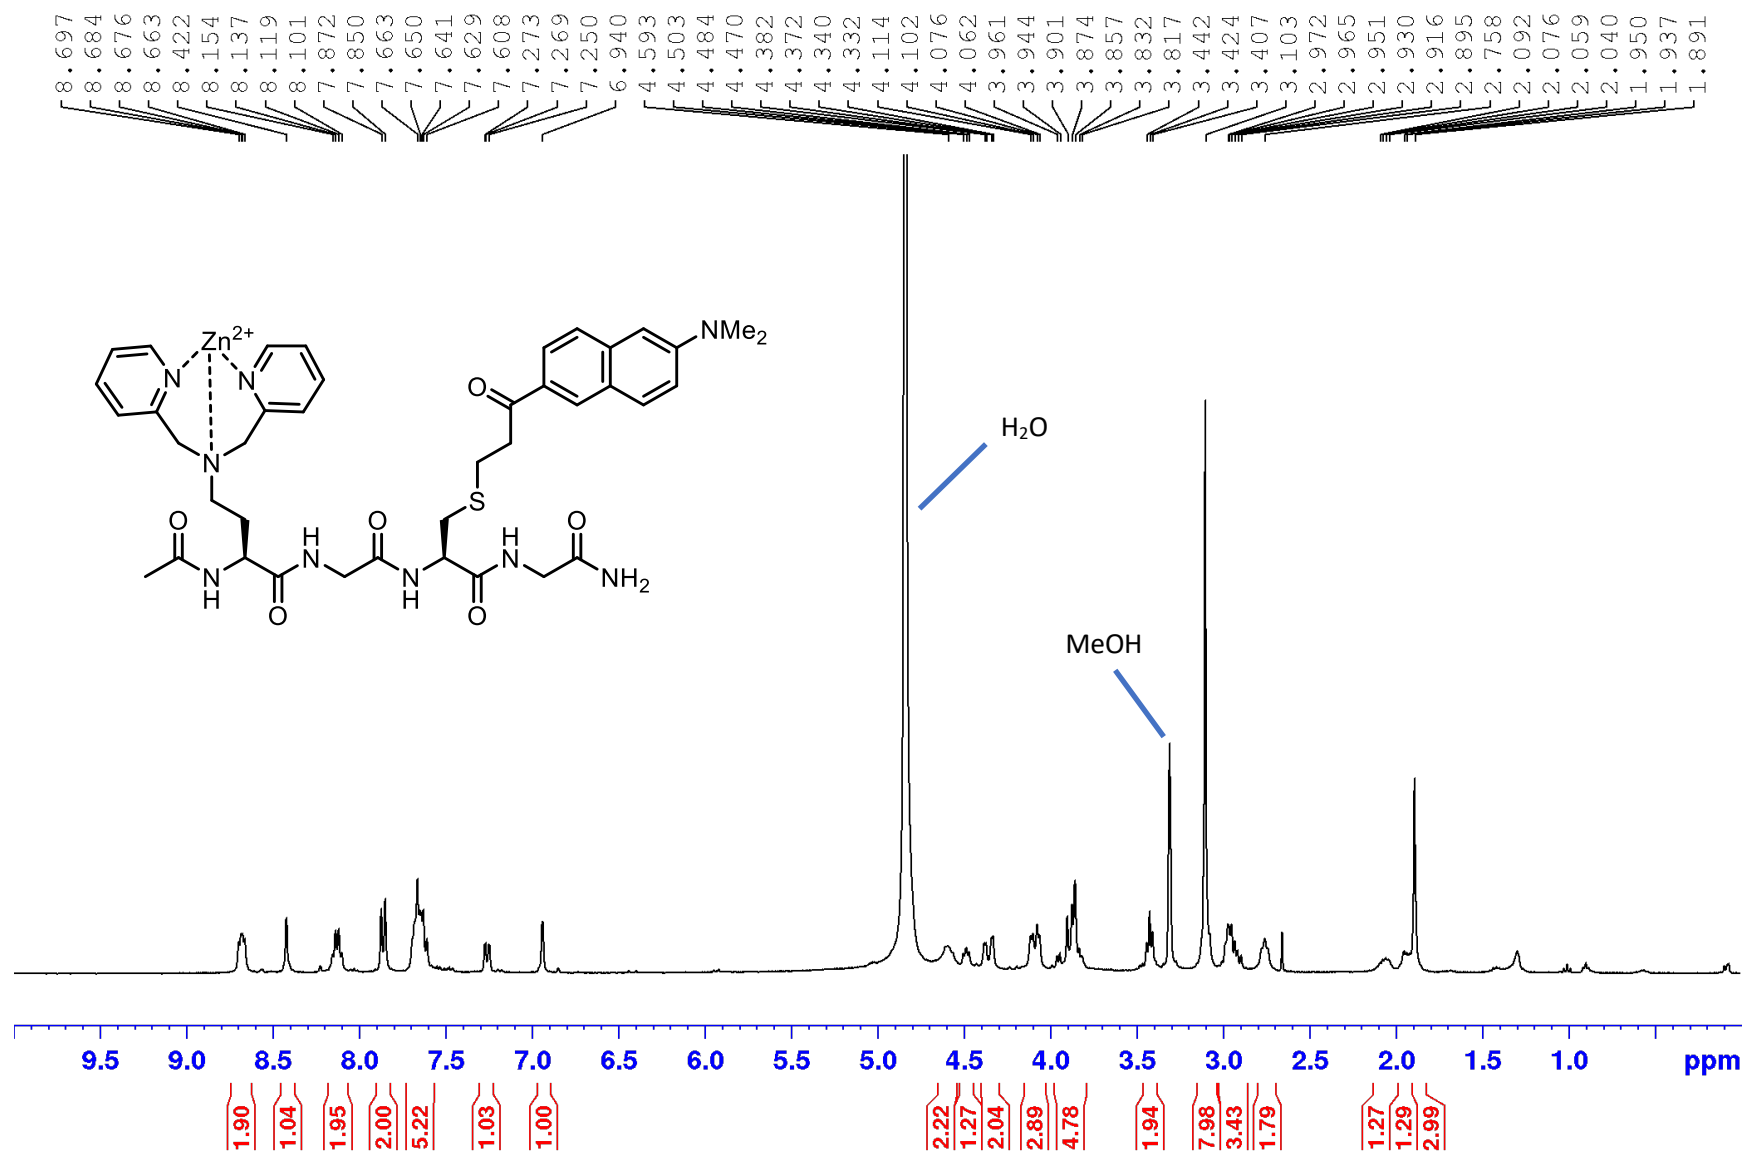

PRODAN-1-Zn—<sup>13</sup>C NMR, 101 MHz, MeOD

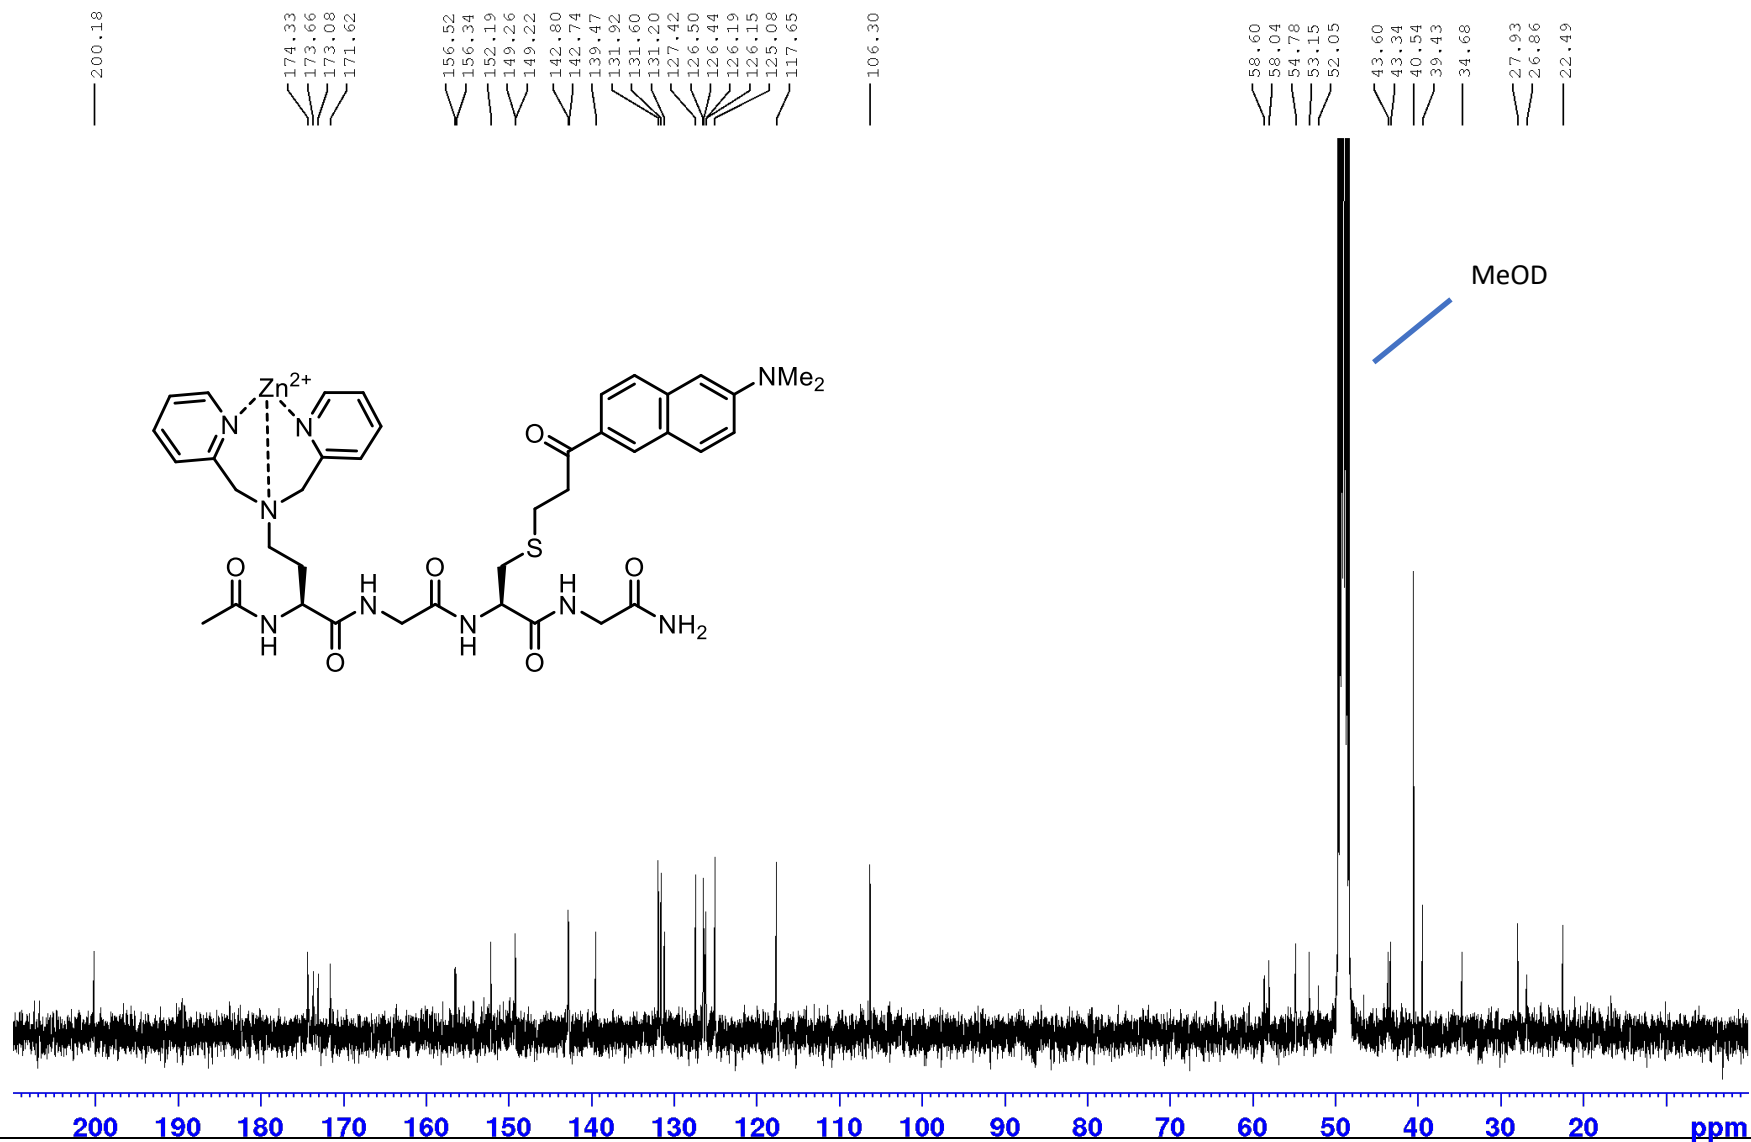



## Mass Spectra

For all compounds, experimental data is shown above, and simulated spectra below.

**NBD-1:** HRMS (ESI) Calc. for  $C_{30}H_{35}N_{10}O_6$  ( $M-H$ )<sup>-</sup> 631.27465, found 631.27453;

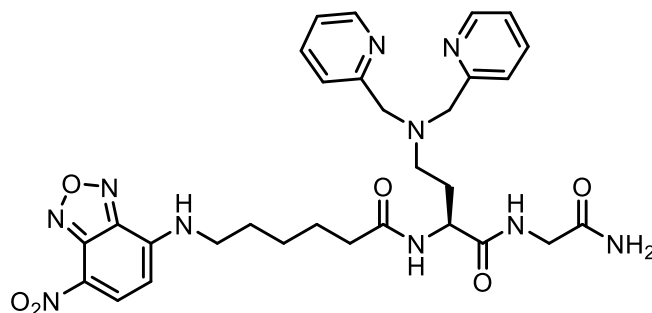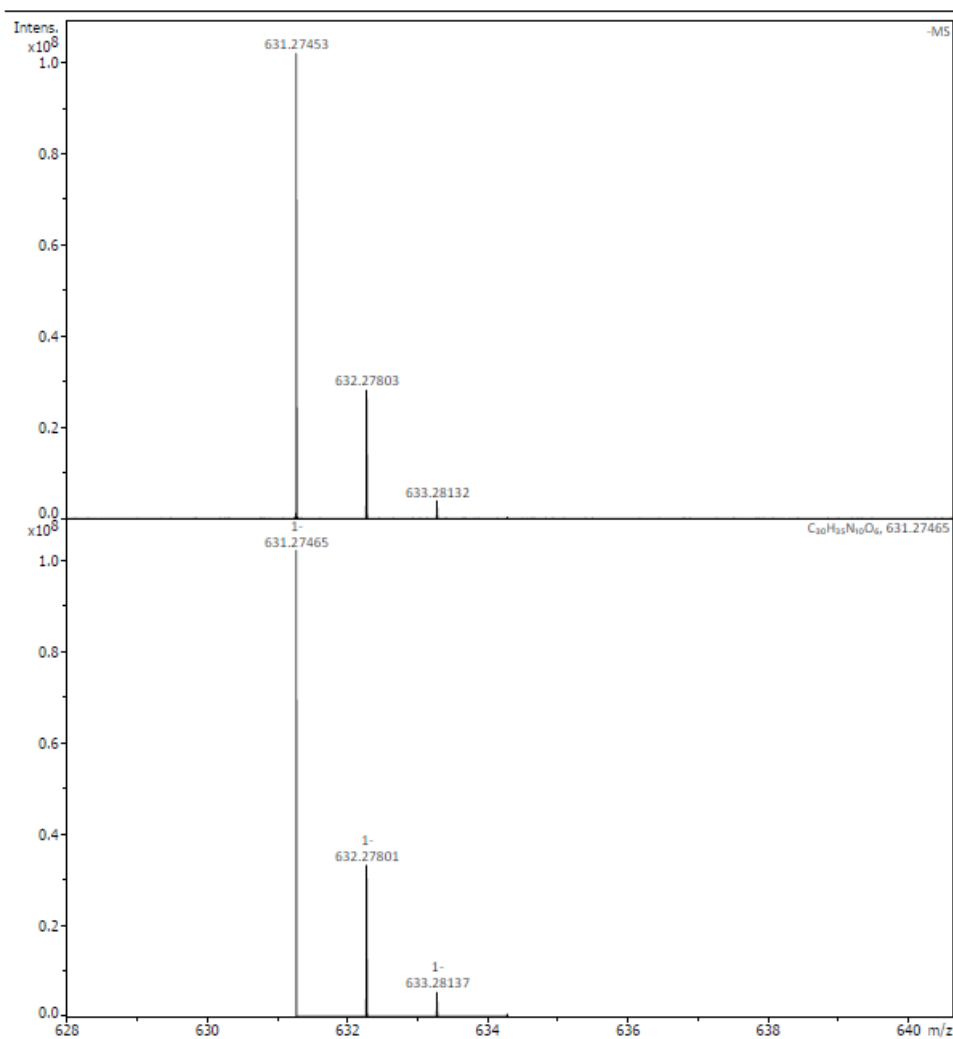

**NBD-1-Zn:** HRMS (ESI) Calc. for  $C_{30}H_{36}N_{10}O_6Zn^{2+}$  ( $M$ ) $^{2+}$  348.10499, found 348.10497

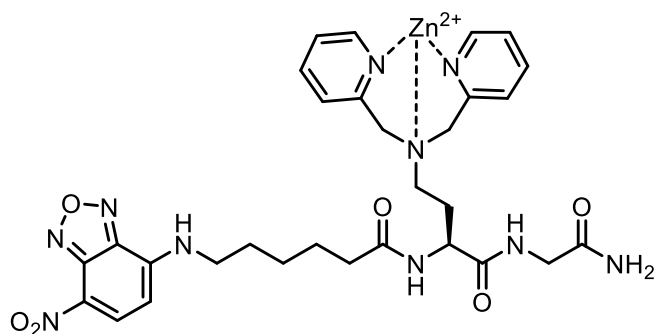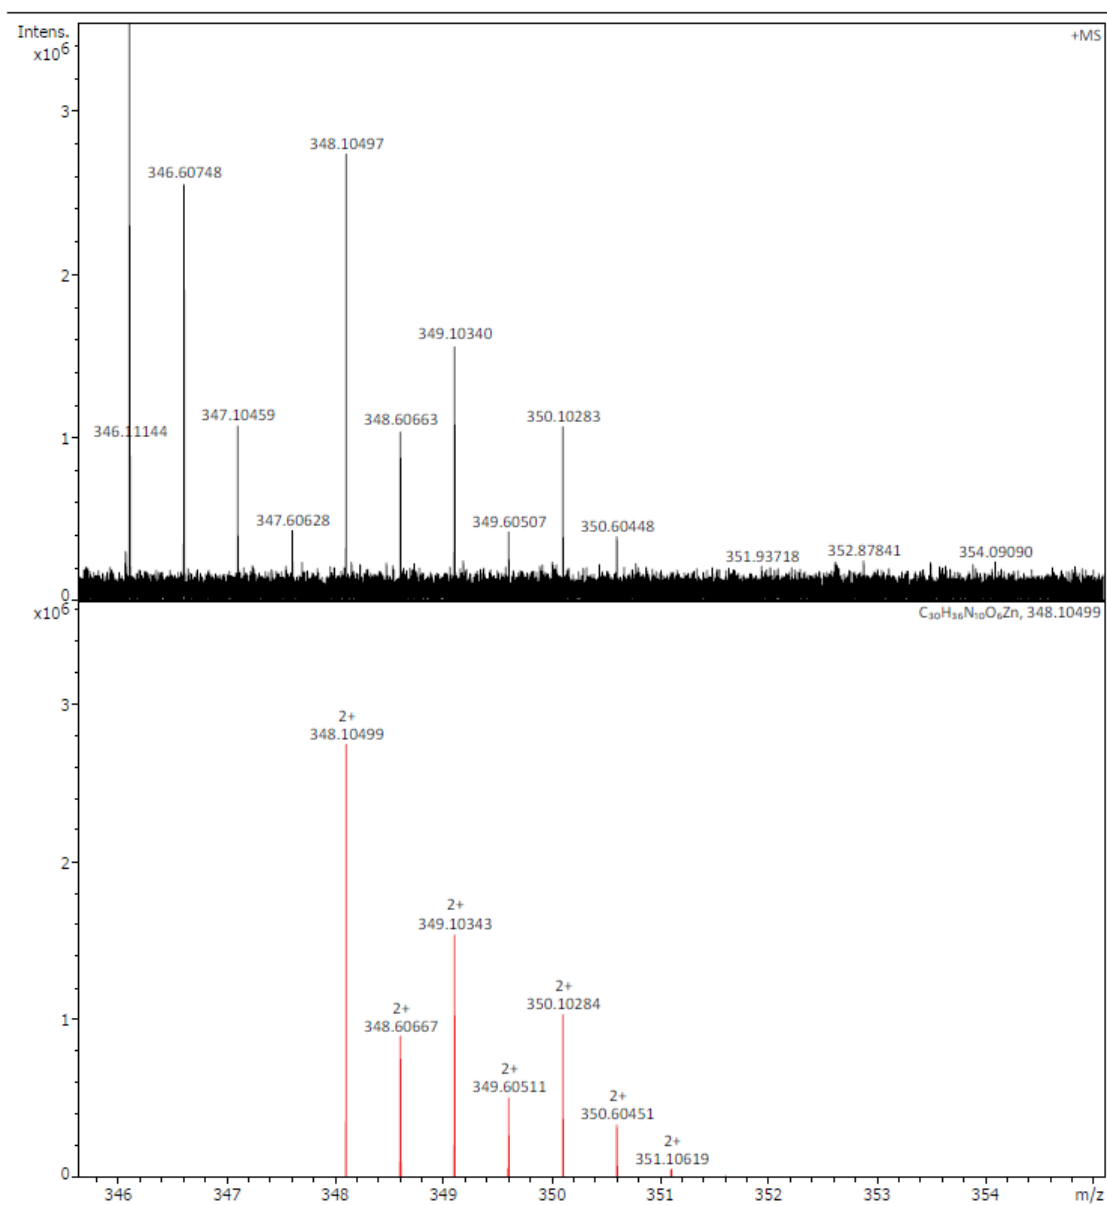

**NBD-1-Ni:** HRMS (ESI) Calc. for  $C_{30}H_{36}N_{10}O_6Ni^{2+}$  ( $M$ ) $^{2+}$  345.10809, found 345.10834

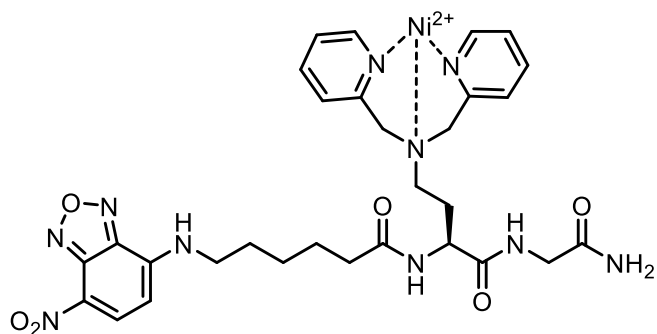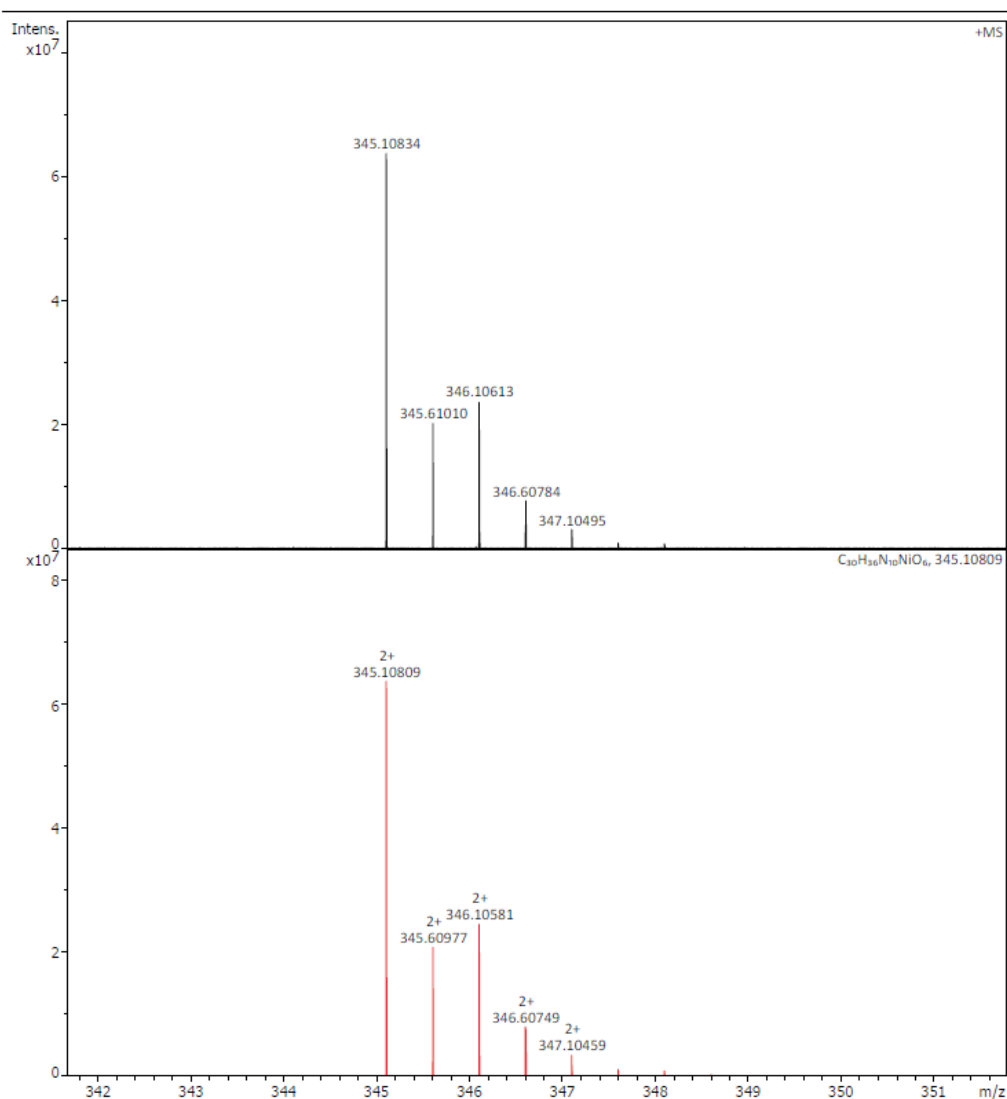

**NBD-1-Co:** HRMS (ESI) Calc. for  $C_{30}H_{36}N_{10}O_6Co^{2+}$  (M) $^{2+}$  345.60701, found 345.60747

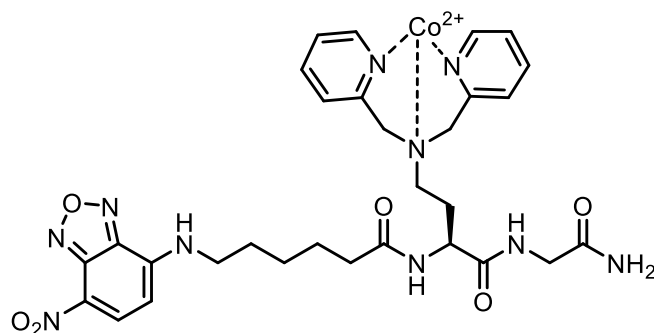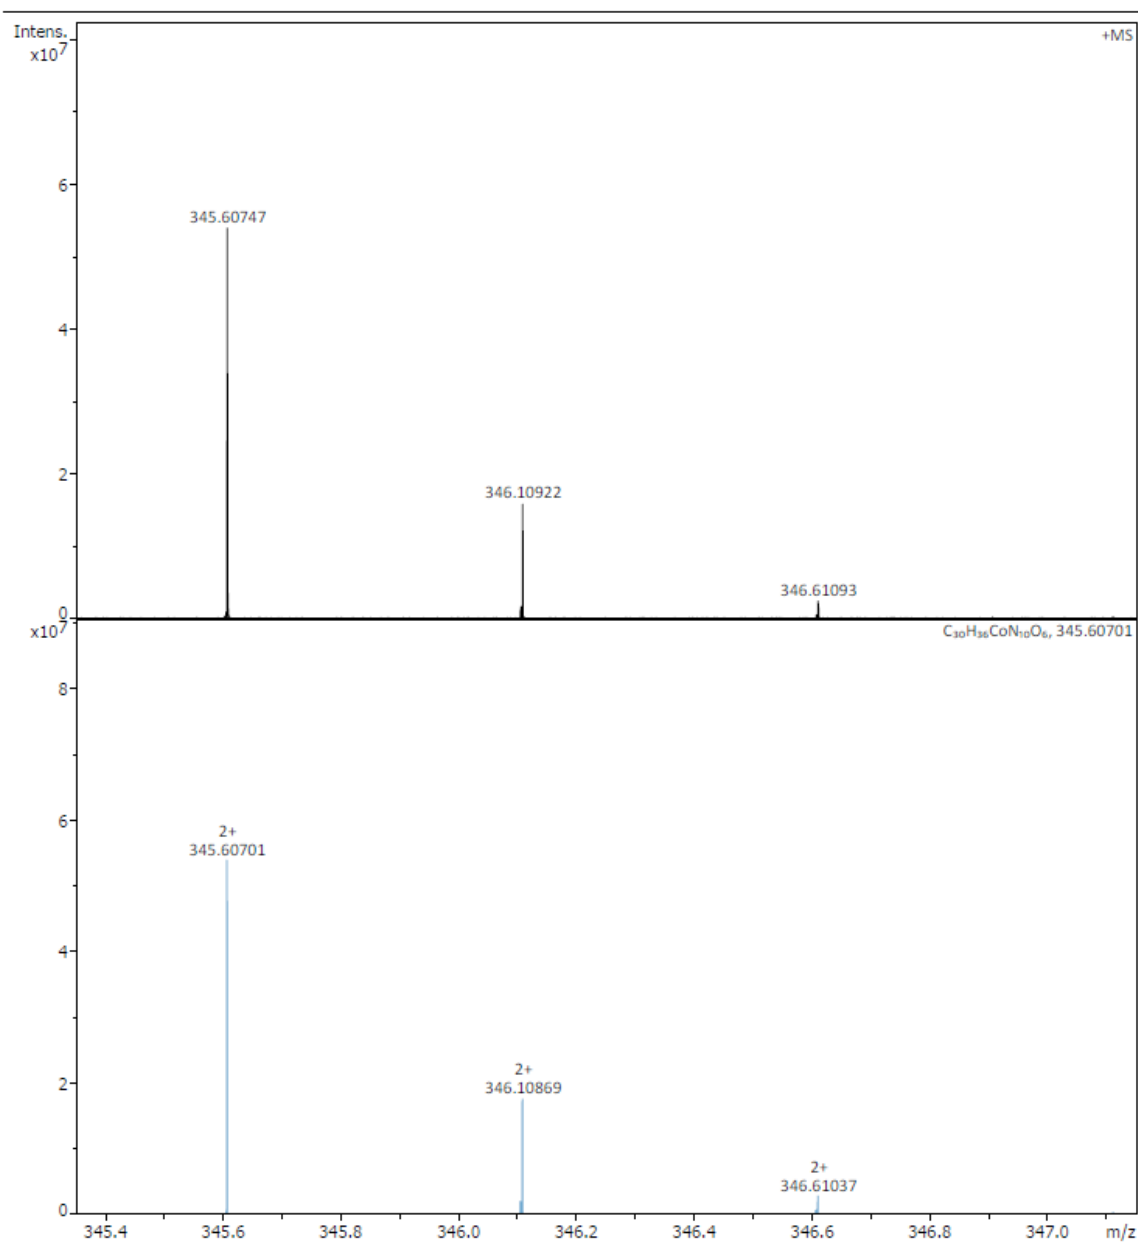

**NBD-1-Mn:** HRMS (ESI) Calc. for  $C_{30}H_{36}N_{10}O_6Mn^{2+}$  ( $M$ ) $^{2+}$  343.60944, found 343.60968

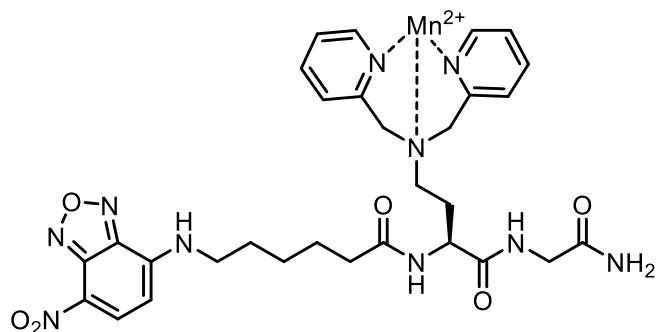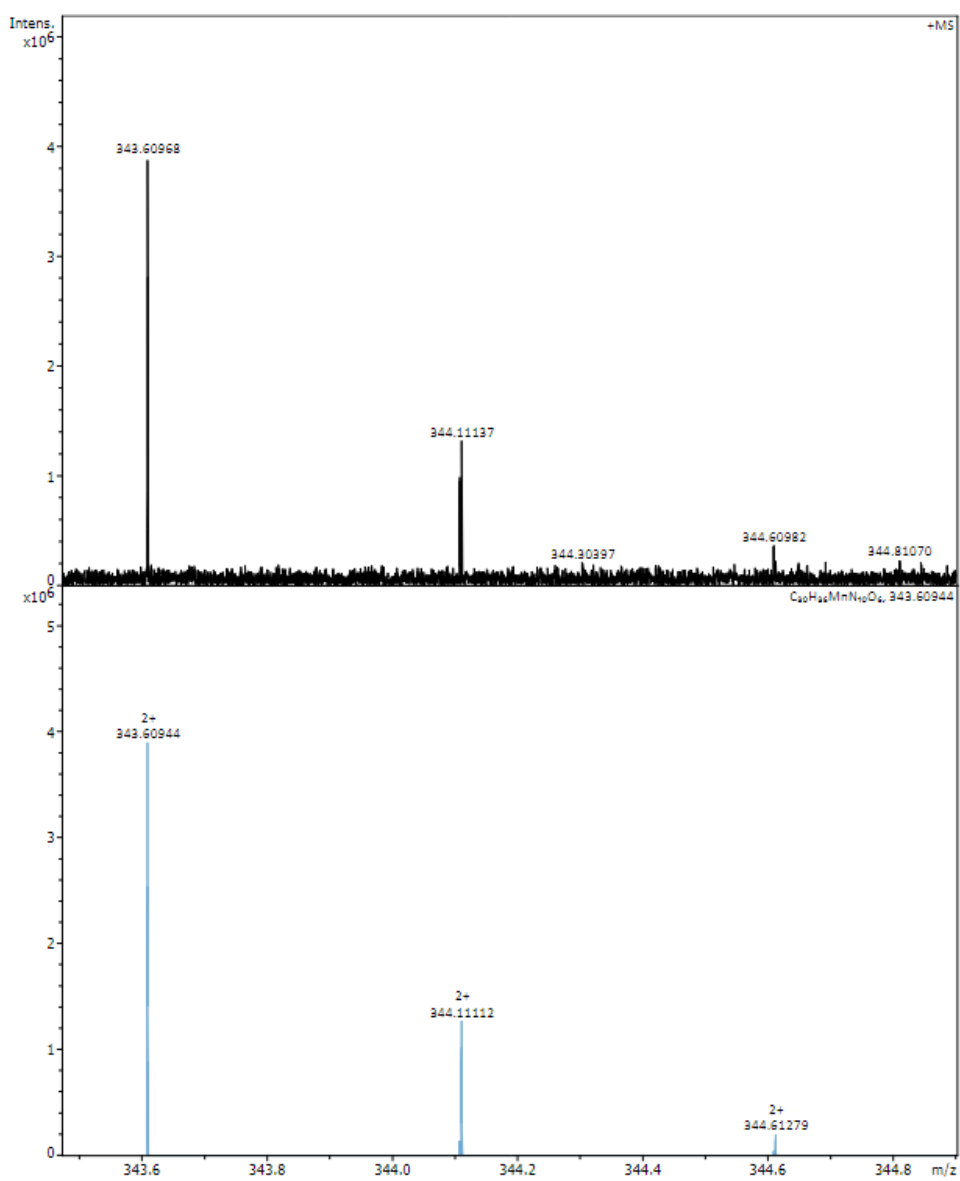

**NBD-2:** HRMS (ESI) Calc. for C<sub>34</sub>H<sub>43</sub>N<sub>12</sub>O<sub>8</sub> (M+H)<sup>+</sup> 747.33300, found 747.33213

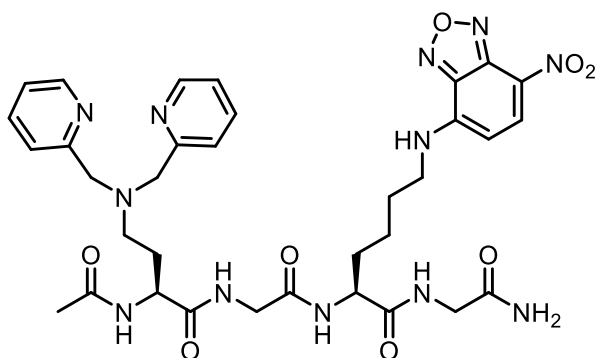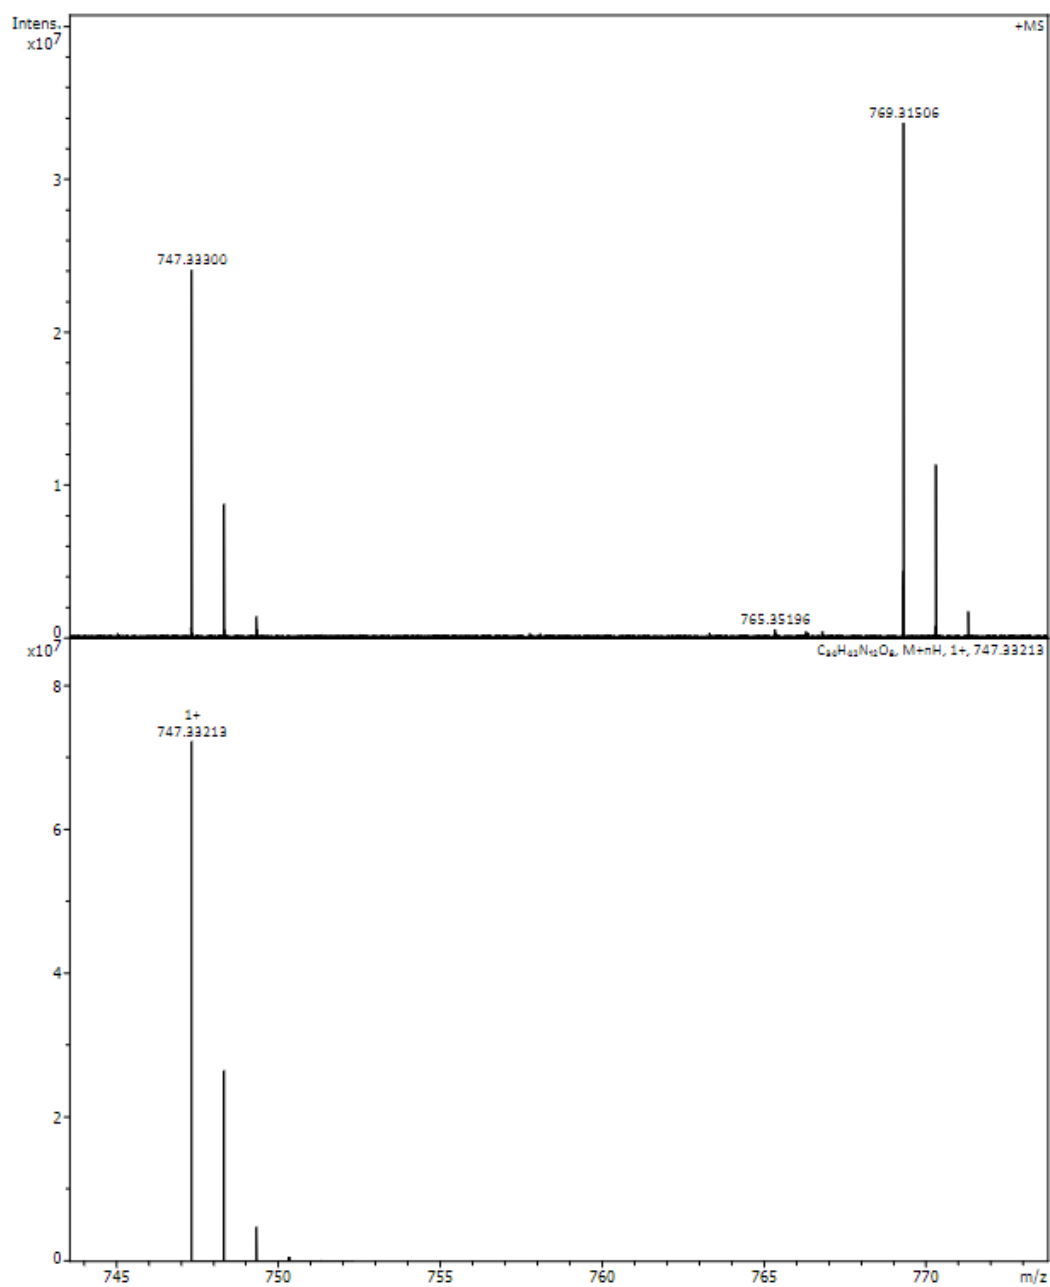

**NBD-2-Zn:** HRMS (ESI) Calc. for  $C_{34}H_{42}N_{12}O_8Zn^{2+}$  (M) $^{2+}$  405.12645, found 405.12668

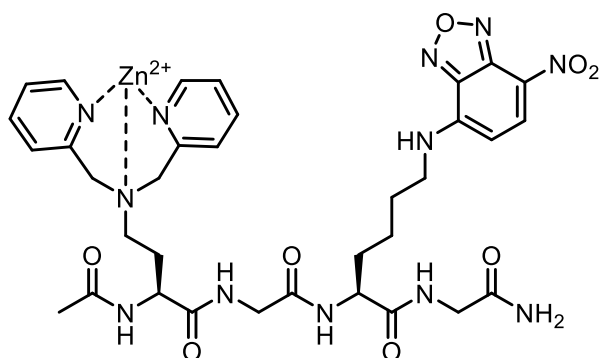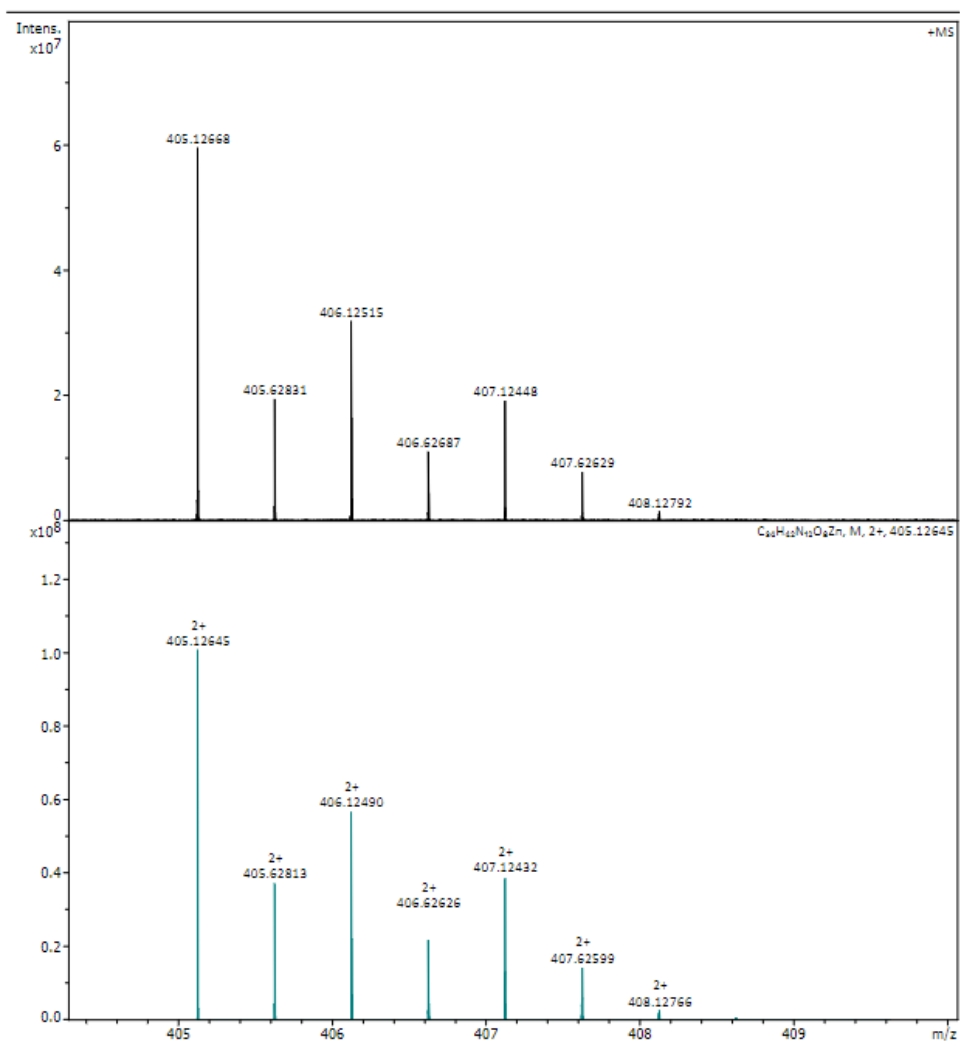

**NBD-2-Ni:** HRMS (ESI) Calc. for  $C_{34}H_{42}N_{12}NiO_8$  (M)<sup>2+</sup> 402.12955, found 402.13008

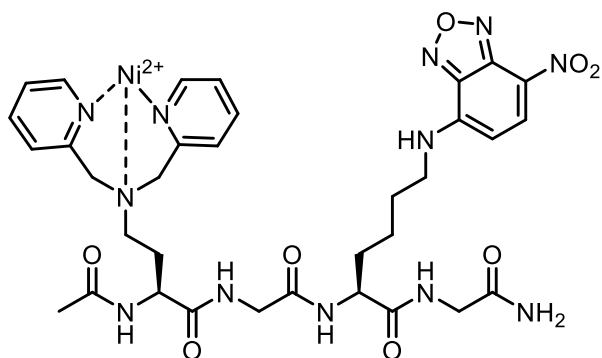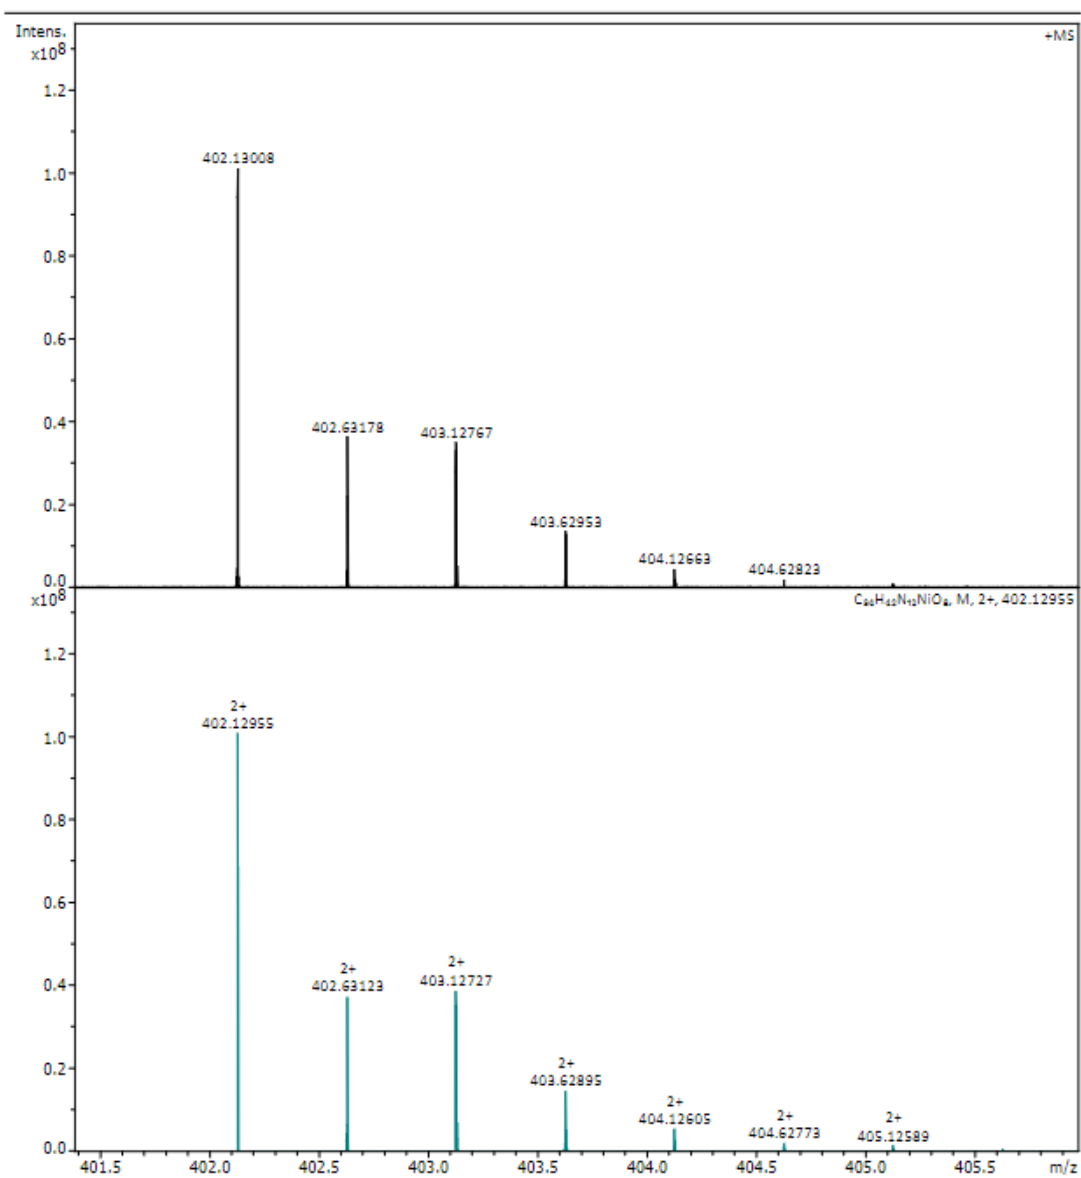



**Peptide 1:** HRMS (ESI) Calc. for  $C_{25}H_{33}N_8O_5S$  (M-H)<sup>-</sup> 557.23001, found 557.22977

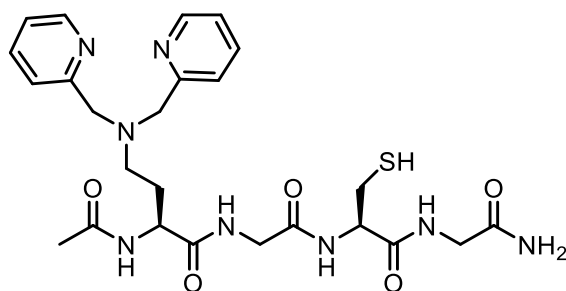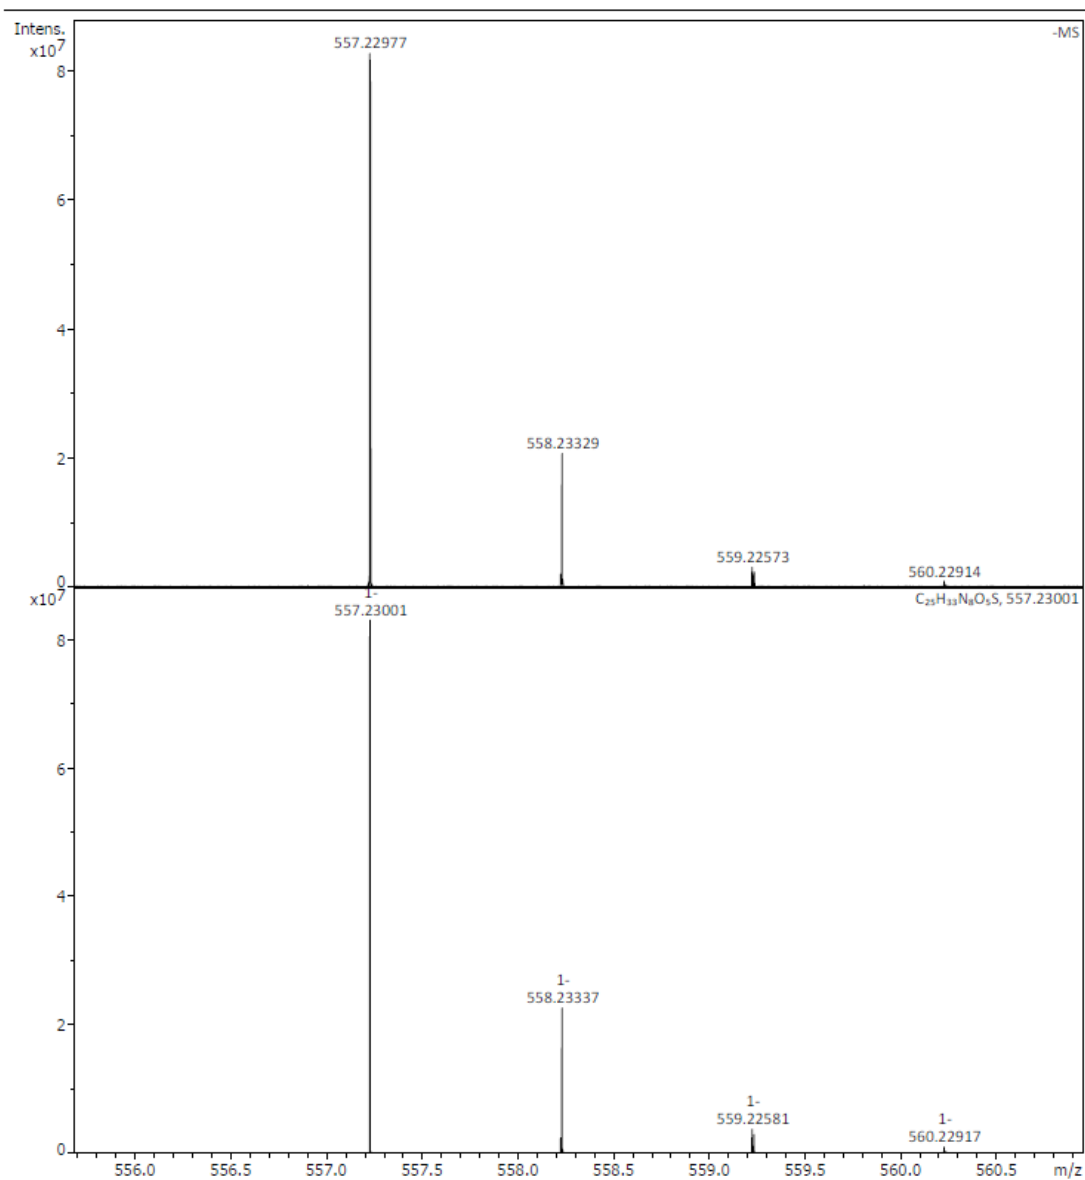

**PRODAN-1:** HRMS (ESI) Calc. for C<sub>40</sub>H<sub>50</sub>N<sub>9</sub>O<sub>6</sub>S (M+H)<sup>+</sup> 784.35993, found 784.35927

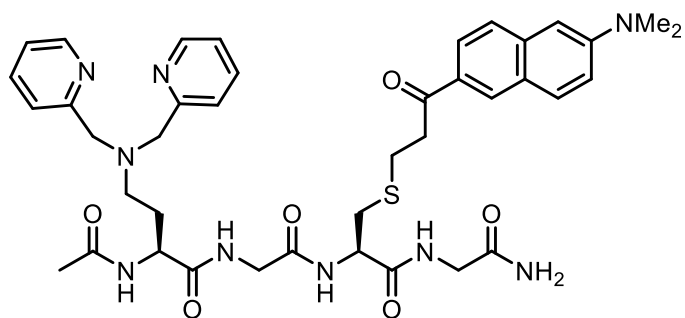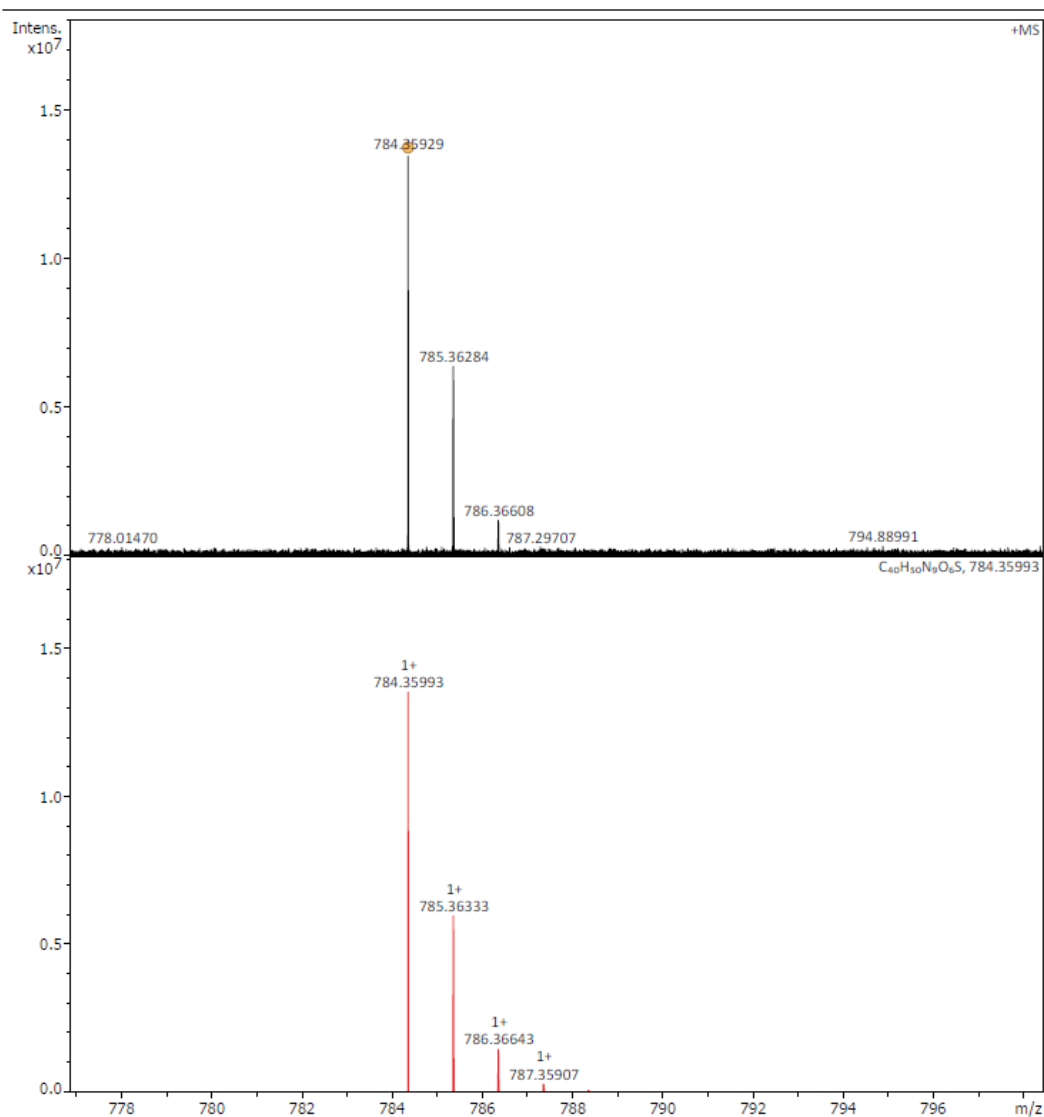

**PRODAN-1-Zn:** HRMS (ESI) Calc. for  $C_{40}H_{50}N_9O_6SZn^{2+}$  ( $M$ ) $^{2+}$  423.64035, found 423.64107

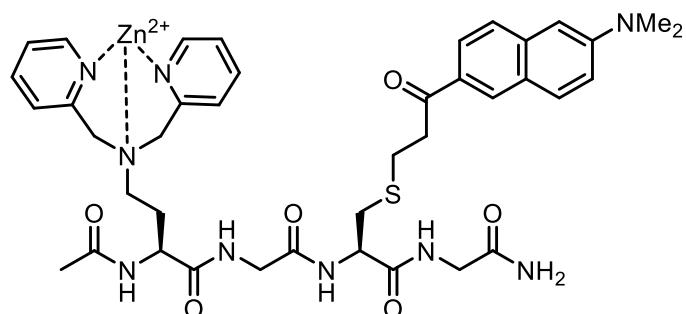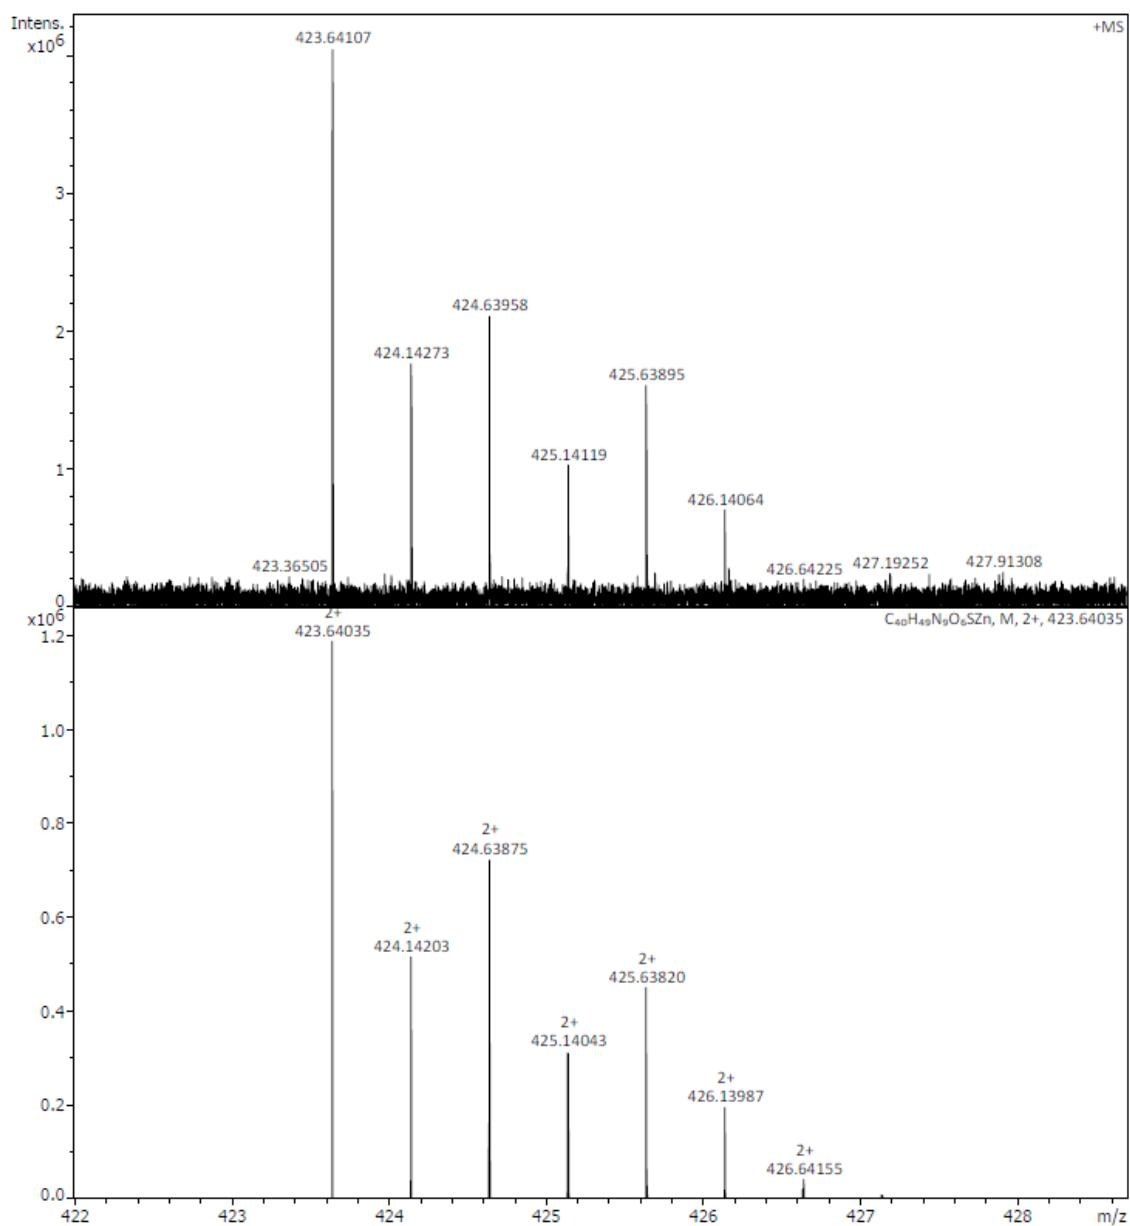

**PRODAN-1-Ni:** HRMS (ESI) Calc. for  $C_{40}H_{50}N_9O_6S Ni^{2+}$  (M) $^{2+}$  420.64345, found 420.64305

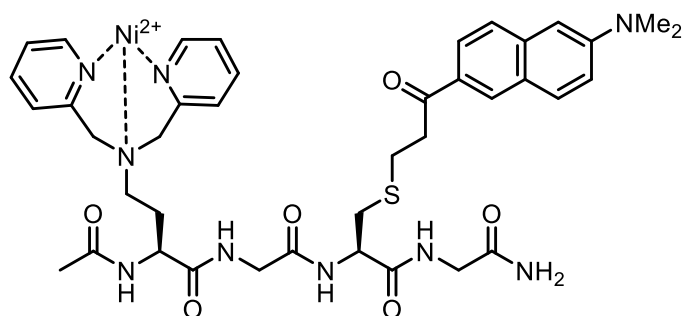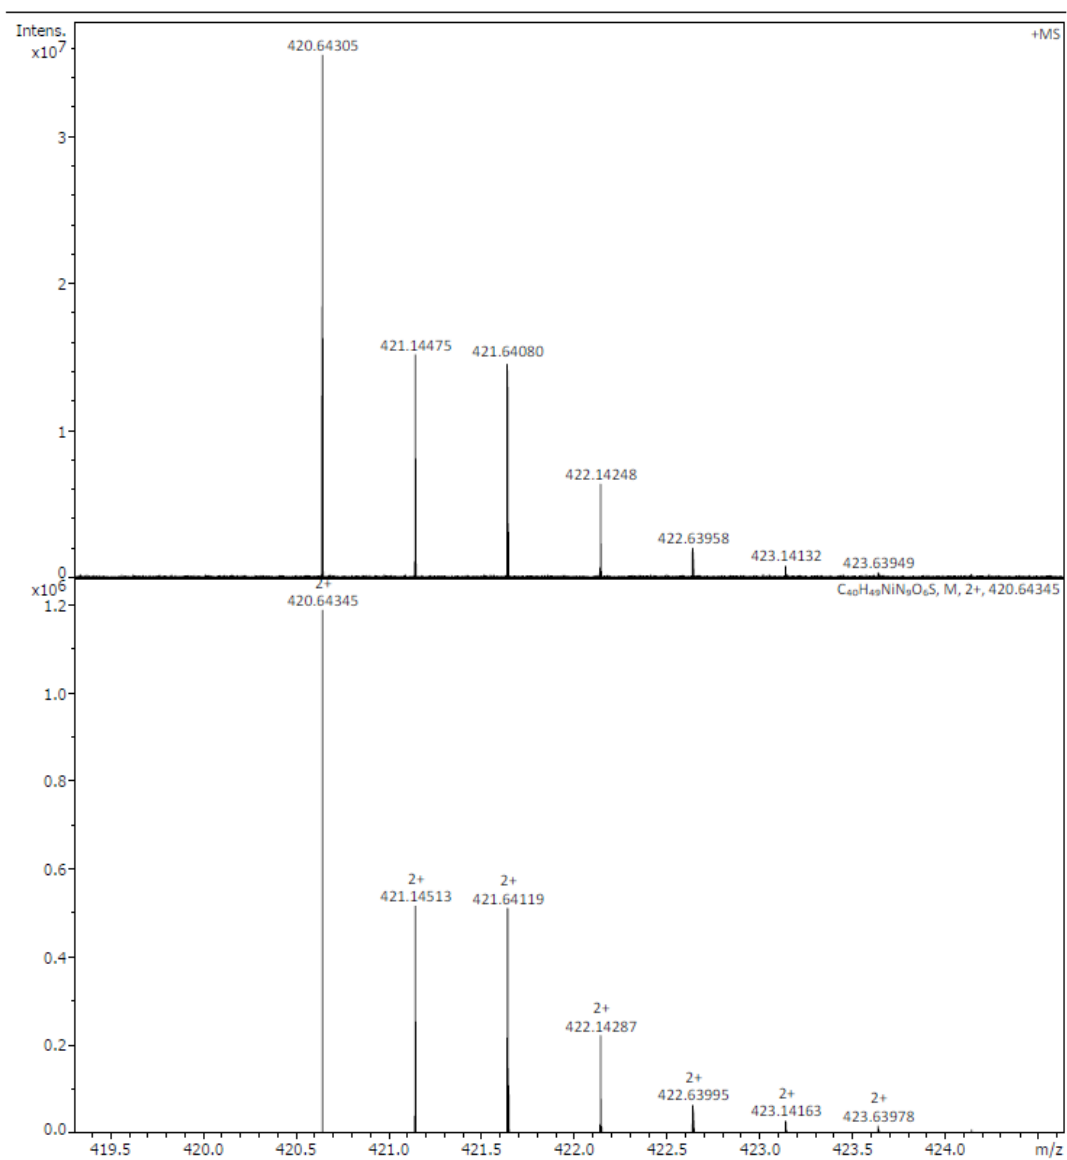

**PRODAN-1-Co:** HRMS (ESI) Calc. for  $C_{40}H_{50}N_9O_6SCo^{2+}$  (M) $^{2+}$  421.14237, found 421.14193

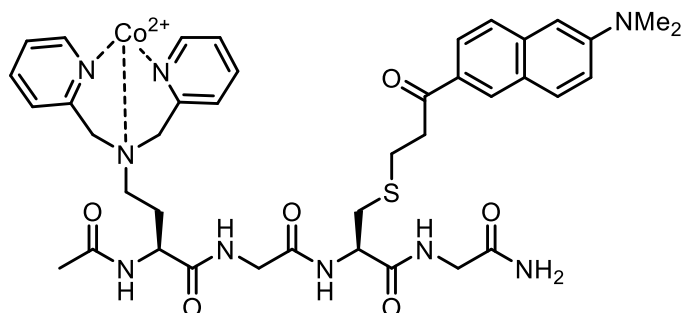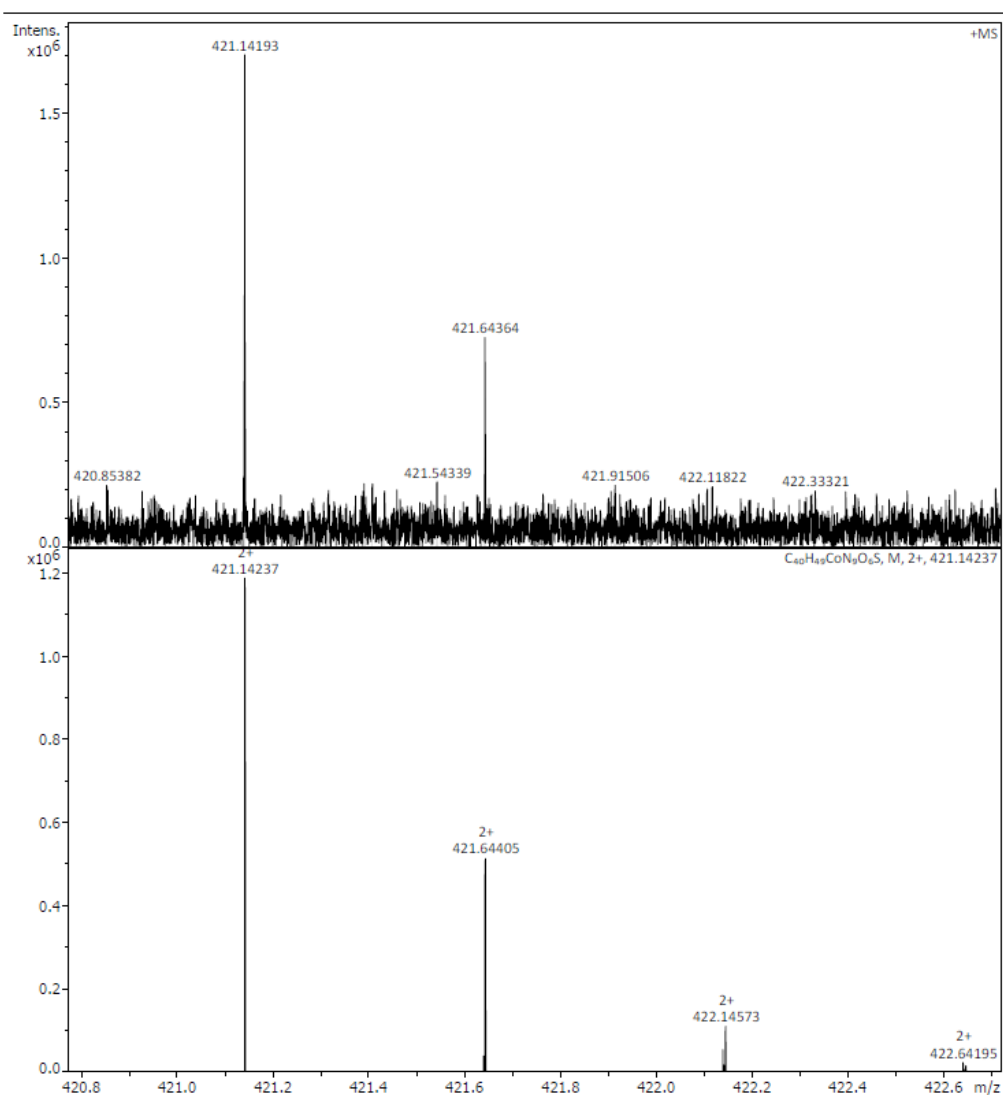

**PRODAN-1-Mn: HRMS (ESI) Calc. for C<sub>40</sub>H<sub>50</sub>N<sub>9</sub>O<sub>6</sub>S Mn<sup>2+</sup> (M)<sup>2+</sup> 419.14480, found 419.14440**

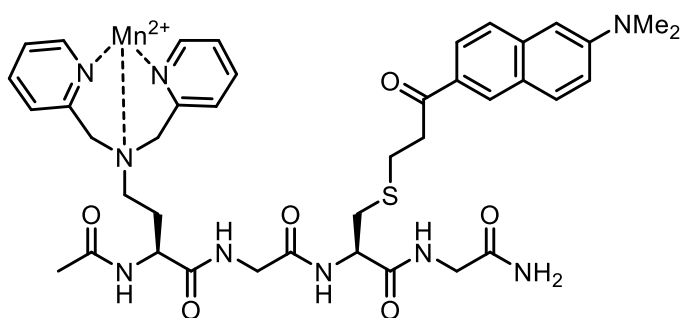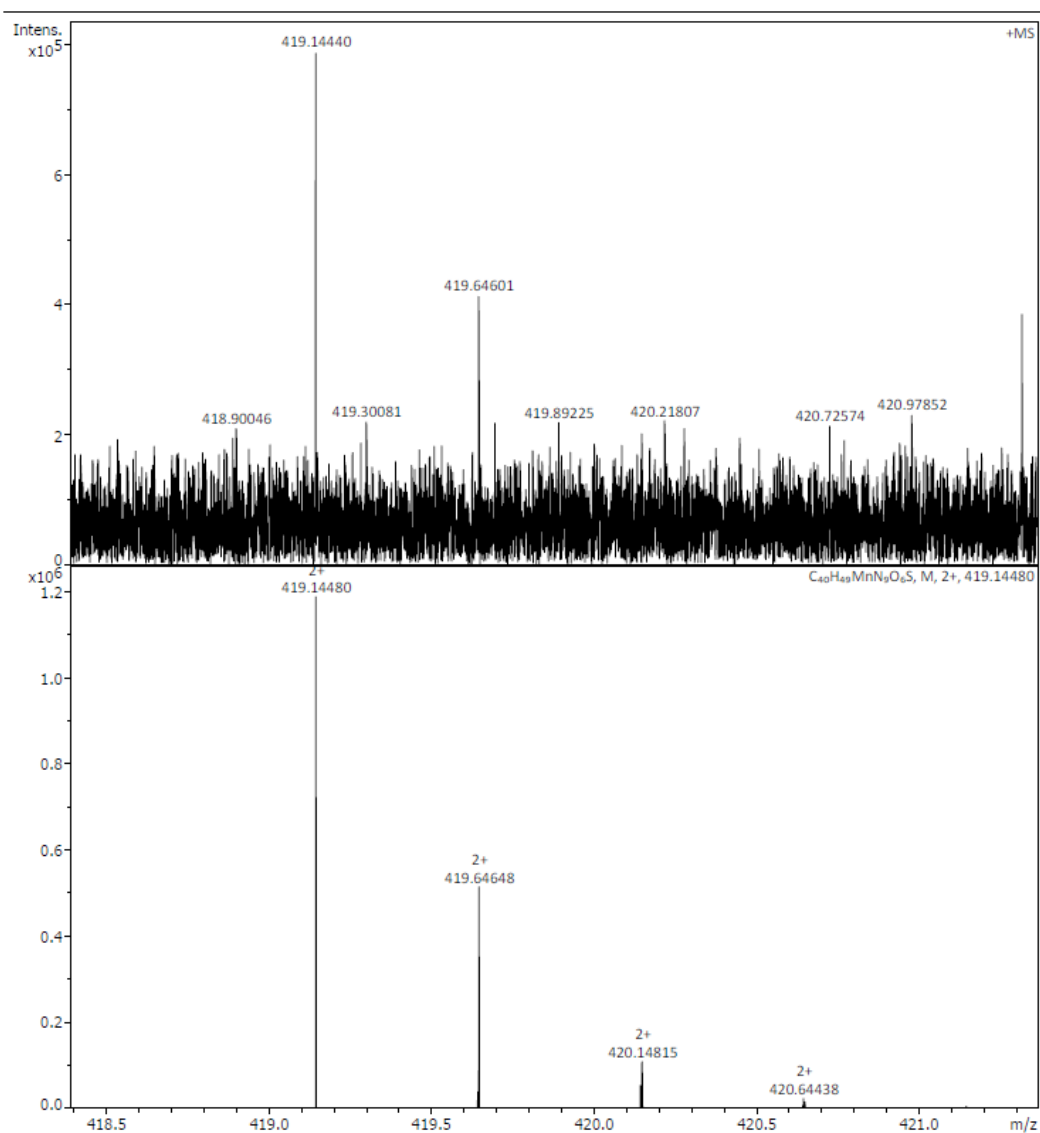

## Excitation-Emission Spectra

### PRODAN-1-Zn

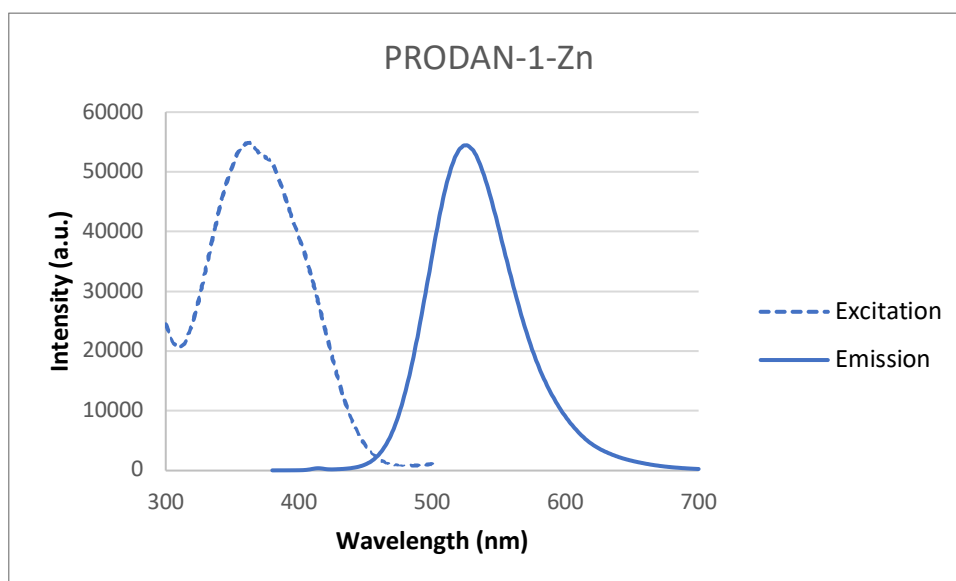

Excitation ( $\lambda_{em} = 528$  nm) and emission ( $\lambda_{ex} = 362$  nm) spectra of **PRODAN-1-Zn** (8  $\mu$ M) in HEPES buffer (120 mM KOAc, 50 mM HEPES, pH 7.5).

### PRODAN-1-Ni

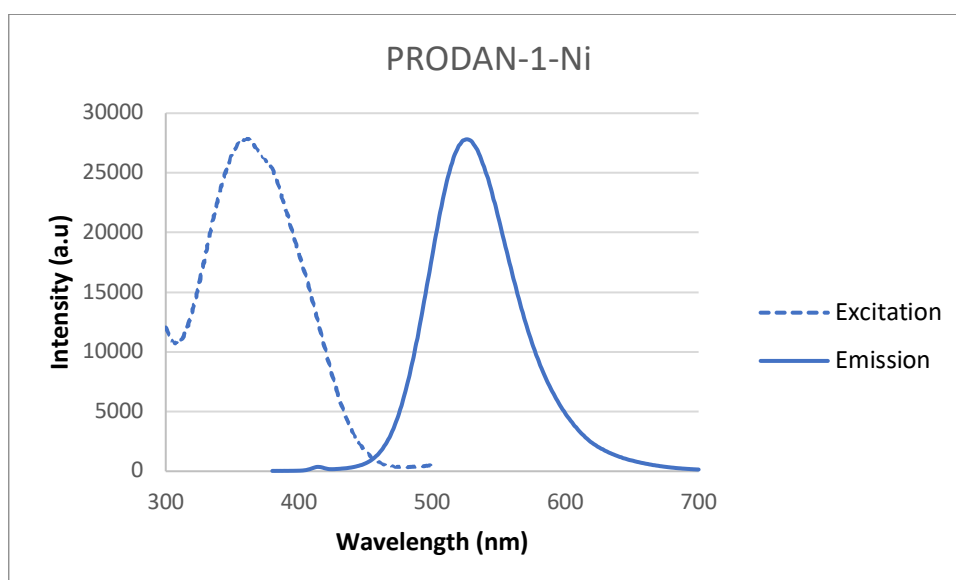

Excitation ( $\lambda_{em} = 528$  nm) and emission ( $\lambda_{ex} = 362$  nm) spectra of **PRODAN-1-Ni** (8  $\mu$ M) in HEPES buffer (120 mM KOAc, 50 mM HEPES, pH 7.5).

### NBD-1-Zn

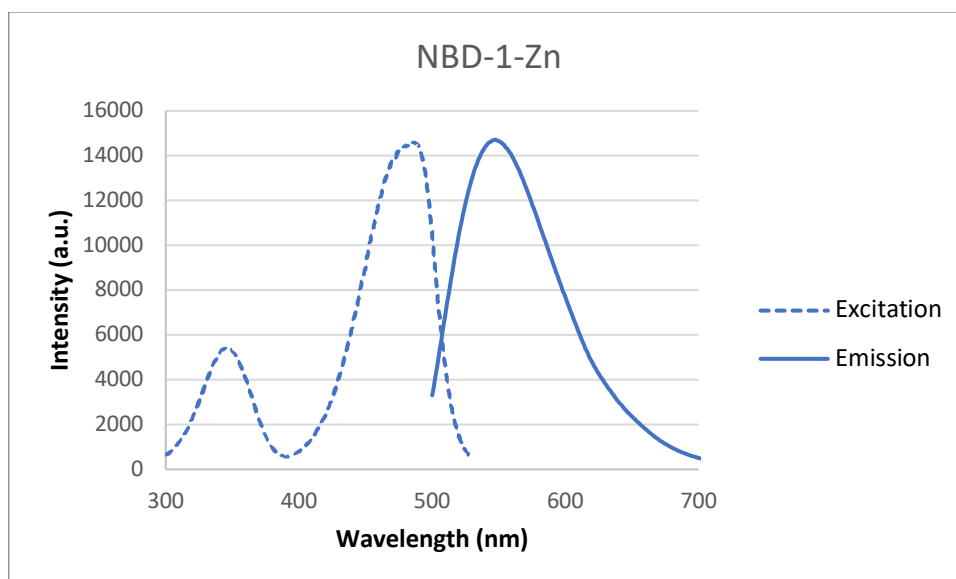

Excitation ( $\lambda_{em} = 548$  nm) and emission ( $\lambda_{ex} = 484$  nm) spectra of **NBD-1-Zn** (8  $\mu$ M) in HEPES buffer (120 mM KOAc, 50 mM HEPES, pH 7.5).

### NBD-1\_Ni

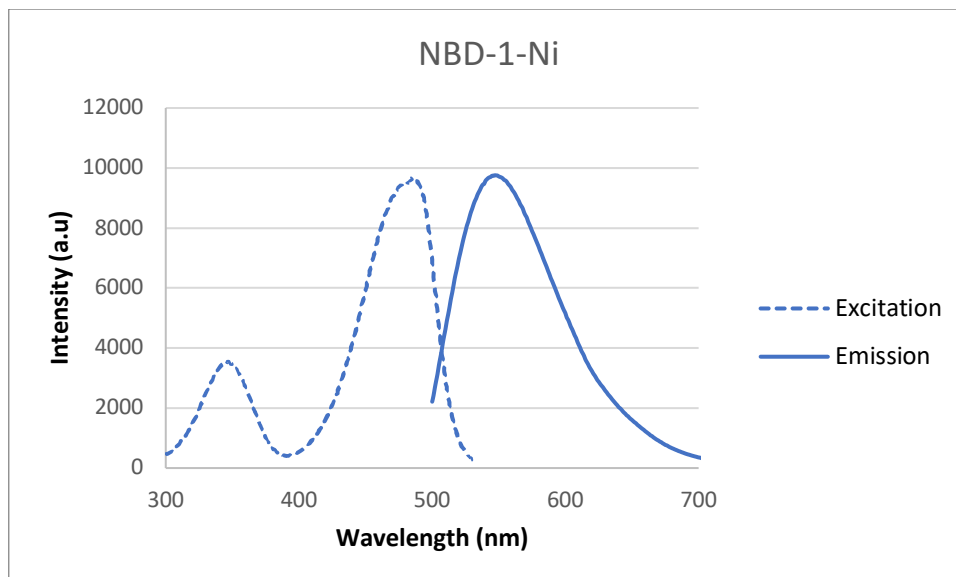

Excitation ( $\lambda_{em} = 548$  nm) and emission ( $\lambda_{ex} = 484$  nm) spectra of **NBD-1-Ni** (8  $\mu$ M) in HEPES buffer (120 mM KOAc, 50 mM HEPES, pH 7.5).



### NBD-2-Zn

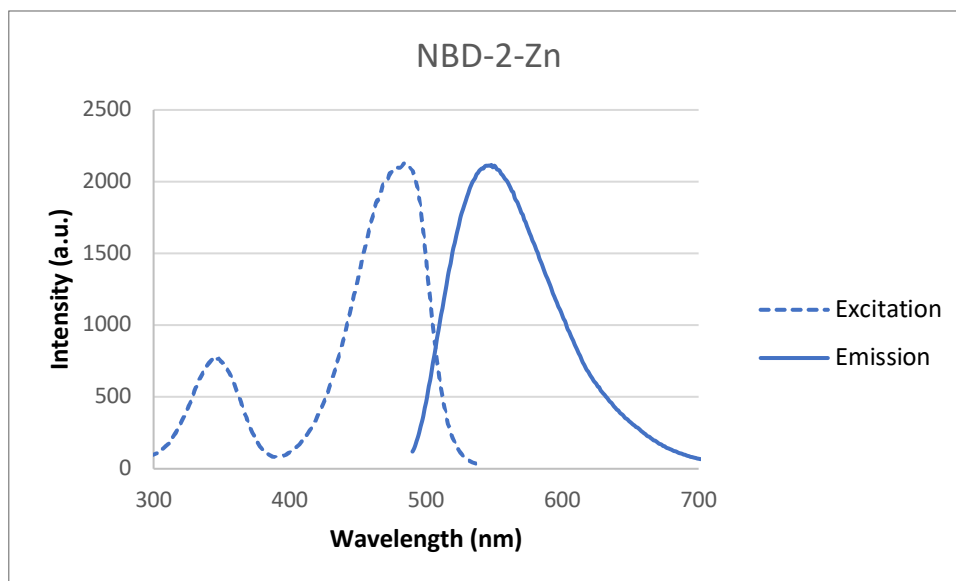

Excitation ( $\lambda_{em} = 548$  nm) and emission ( $\lambda_{ex} = 484$  nm) spectra of **NBD-2-Zn** (8  $\mu$ M) in HEPES buffer (120 mM KOAc, 50 mM HEPES, pH 7.5).

### NBD-2-Ni

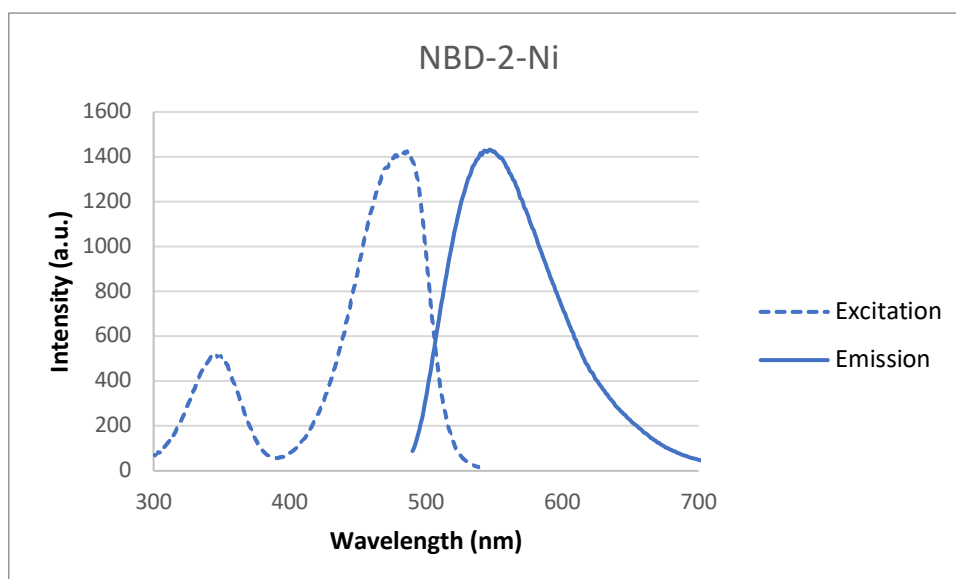

Excitation ( $\lambda_{em} = 548$  nm) and emission ( $\lambda_{ex} = 484$  nm) spectra of **NBD-2-Ni** (8  $\mu$ M) in HEPES buffer (120 mM KOAc, 50 mM HEPES, pH 7.5).

## References

1. B. Ercan, T. Naito, D. H. Z. Koh, D. Dharmawan and Y. Saheki, *The EMBO Journal*, 2021, **40**, e106524.
2. P. Thordarson, supramolecular.org, <http://app.supramolecular.org/bindfit/>, (accessed 24/01/24, 2024).
3. P. Thordarson, *Chemical Society Reviews*, 2011, **40**, 1305-1323.
4. K. M. DiVittorio, J. R. Johnson, E. Johansson, A. J. Reynolds, K. A. Jolliffe and B. D. Smith, *Org. Biomol. Chem.*, 2006, **4**, 1966-1976.
